# Supplementary material
Source: publisher figshare collection journal article supplement (https://gsapubs.figshare.com/ndownloader/files/28005396)
Supplement: Supplementary file 1 [file 28005396]

## Sheet: Table S1 Gooley Data
This Supplemental Material accompanies Gooley, J.T., Grove, M., and Graham, S.A., 2021,
Tectonic evolution of the central California margin as reflected by detrital zircon composition
in the Mount Diablo region, in Sullivan, R., Sloan, D., Unruh, J.R., and Schwartz, D.P., eds.,
Regional Geology of Mount Diablo, California: Its Tectonic Evolution on the North America
Plate Boundary: Geological Society of America Memoir 217, https://doi.org/10.1130/2021.1217(14).
Table S1. U-Th-Pb isotopic composition of detrital zircons analyzed at the University of Arizona LaserChron Center
				Isotopic Ratios								Apparent Ages
Analysis	U	206Pb	U/Th	206Pb*	±	207Pb*	±	206Pb*	±	error		206Pb*	±	207Pb*	±	206Pb*	±	Best	±	Conc
	(ppm)	204Pb		207Pb*	(%)	235U	(%)	238U	(%)	corr.		238U	Ma	235U	Ma	207Pb*	Ma	age†	Ma	(%)
JG-BH5
JG-BH3-81	553.349	3652.77	0.664912	20.1044	17.3441	0.0194903	18.4285	0.0028419	6.22816	0.337964		18.2941	1.13777	19.5998	3.57732	182.861	406.662	18.2941	1.13777	NA
JG-BH3-8	379.642	4816.15	1.84255	26.506	27.581	0.0205779	28.452	0.00395589	6.98602	0.245537		25.451	1.77451	20.6823	5.82509	-504.364	746.472	25.451	1.77451	NA
JG-BH3-105	225.104	6748.69	1.25704	32.7268	38.5233	0.0214732	39.1482	0.00509682	6.9664	0.17795		32.7728	2.27729	21.5728	8.35645	NA	NA	32.7728	2.27729	NA
JG-BH3-20	379.522	5319.63	1.08599	24.966	15.1521	0.0361937	15.4339	0.00655361	2.93576	0.190215		42.1095	1.23221	36.101	5.47397	-347.423	392.816	42.1095	1.23221	NA
JG-BH3-52	358.956	7785.53	1.56362	20.4438	5.80901	0.074055	6.32362	0.0109803	2.49871	0.395139		70.3977	1.74946	72.5402	4.42717	143.739	136.422	70.3977	1.74946	NA
JG-BH3-102	518.377	28905.1	2.19436	20.7493	5.37478	0.0944744	8.44037	0.0142172	6.50782	0.771034		91.0049	5.88082	91.6629	7.39789	108.827	126.991	91.0049	5.88082	NA
JG-BH3-32	831.948	47018.5	9.80882	21.0409	3.67781	0.0932378	3.84096	0.0142283	1.10757	0.288358		91.0753	1.00163	90.515	3.3262	75.7459	87.3955	91.0753	1.00163	NA
JG-BH3-61	752.135	45965.5	0.891536	20.7031	6.3718	0.0964325	7.12823	0.0144796	3.1956	0.448302		92.6724	2.94025	93.4779	6.36588	114.066	150.442	92.6724	2.94025	NA
JG-BH3-79	353.702	11710.7	1.44331	20.1127	7.33757	0.100709	7.58391	0.0146906	1.91724	0.252803		94.0128	1.78937	97.431	7.04576	181.892	171.138	94.0128	1.78937	NA
JG-BH3-35	227.388	7831.25	2.31379	23.0003	13.5783	0.0909265	14.7757	0.0151678	5.82668	0.394342		97.0438	5.61208	88.3661	12.5053	-140.155	337.527	97.0438	5.61208	NA
JG-BH3-11	520.257	3699.33	1.85071	19.2434	11.9103	0.108916	11.941	0.0152011	0.855644	0.0716562		97.2551	0.825911	104.974	11.9092	283.927	273.263	97.2551	0.825911	NA
JG-BH3-6	462.51	14543.1	1.02711	21.0786	4.21279	0.100272	4.3543	0.0153292	1.10104	0.252863		98.0687	1.07161	97.0274	4.0293	71.4853	100.2	98.0687	1.07161	NA
JG-BH3-54	224.742	14799.7	2.05413	22.885	16.8694	0.0925181	17.0729	0.015356	2.62843	0.153953		98.2386	2.56255	89.8464	14.6813	-127.733	419.207	98.2386	2.56255	NA
JG-BH3-40	285.747	18449.9	1.72403	22.6776	10.4413	0.0935232	10.6094	0.0153821	1.88108	0.177303		98.4044	1.837	90.7801	9.21346	-105.285	257.399	98.4044	1.837	NA
JG-BH3-19	670.314	27706.9	5.343	20.5837	3.39116	0.103908	4.60409	0.0155121	3.1141	0.676378		99.23	3.06646	100.377	4.4004	127.733	79.8287	99.23	3.06646	NA
JG-BH3-47	451.712	6043.54	1.1925	21.4632	5.99234	0.0996581	6.22015	0.0155134	1.66797	0.268155		99.2378	1.64258	96.4607	5.72387	28.3143	143.754	99.2378	1.64258	NA
JG-BH3-31	397.794	34440.5	1.59937	21.1088	4.84993	0.101444	5.05036	0.0155306	1.40864	0.278919		99.3475	1.38872	98.1087	4.72303	68.1101	115.446	99.3475	1.38872	NA
JG-BH3-28	659.588	45396.8	1.48225	19.6803	4.20856	0.108956	4.2579	0.0155519	0.646324	0.151794		99.4823	0.638042	105.01	4.24782	232.296	97.2194	99.4823	0.638042	NA
JG-BH3-21	214.787	12337.7	1.19667	19.3852	16.9859	0.110672	17.2594	0.0155598	3.06053	0.177325		99.5328	3.02284	106.579	17.4642	267.072	392.133	99.5328	3.02284	NA
JG-BH3-46	232.185	9558.33	1.29151	21.8348	9.24681	0.0993351	9.36254	0.0157308	1.46753	0.156745		100.618	1.46514	96.1624	8.59026	-12.9638	223.827	100.618	1.46514	NA
JG-BH3-22	1307.03	104332	1.34689	20.6991	1.34467	0.104877	1.97067	0.0157445	1.44063	0.731033		100.705	1.43951	101.268	1.89937	114.521	31.7466	100.705	1.43951	NA
JG-BH3-63	553.328	43690.9	1.33915	20.3992	4.71241	0.109032	4.89184	0.0161312	1.31272	0.268349		103.158	1.34341	105.08	4.88333	148.888	110.496	103.158	1.34341	NA
JG-BH3-25	476.746	31284.1	1.42343	21.7027	4.07186	0.102646	4.53577	0.0161567	1.9983	0.440565		103.321	2.0482	99.2158	4.28736	1.64022	98.1407	103.321	2.0482	NA
JG-BH3-72	591.018	11929.3	1.88129	20.7156	4.77616	0.107689	4.9628	0.0161796	1.34823	0.271666		103.466	1.38382	103.849	4.89908	112.638	112.76	103.466	1.38382	NA
JG-BH3-64	353.312	47147.5	2.05011	19.2419	11.9449	0.116368	12.0875	0.0162397	1.85136	0.153163		103.847	1.90718	111.774	12.7943	284.083	274.061	103.847	1.90718	NA
JG-BH3-24	958.536	29439.1	1.83341	20.4987	3.09111	0.109962	3.73757	0.0163481	2.10108	0.562149		104.534	2.17863	105.93	3.75972	137.465	72.6415	104.534	2.17863	NA
JG-BH3-43	747.409	18015.4	2.46915	20.6287	2.34063	0.109395	2.7414	0.0163669	1.42714	0.520588		104.654	1.4815	105.411	2.74482	122.571	55.1195	104.654	1.4815	NA
JG-BH3-108	72.5841	2528.18	1.26726	28.8705	38.1886	0.0785195	38.9664	0.0164411	7.74665	0.198803		105.124	8.07756	76.7521	28.8129	-737.675	1101.75	105.124	8.07756	NA
JG-BH3-38	189.796	11993.3	1.68035	22.8737	11.5837	0.0992814	11.7521	0.0164704	1.98227	0.168673		105.31	2.07056	96.1128	10.7776	-126.509	286.868	105.31	2.07056	NA
JG-BH3-85	81.0043	3563.05	2.98257	32.9233	47.2522	0.06906	47.4134	0.0164903	3.90655	0.0823934		105.437	4.08543	67.8071	31.1094	-1121.02	1508.1	105.437	4.08543	NA
JG-BH3-98	280.15	12333.5	1.83321	21.7861	8.73742	0.105247	8.91842	0.0166298	1.78766	0.200446		106.321	1.88507	101.608	8.62339	-7.56404	211.247	106.321	1.88507	NA
JG-BH3-75	318.948	13274.5	2.33393	20.6344	10.1039	0.111654	10.2371	0.0167096	1.64571	0.16076		106.827	1.74357	107.477	10.4406	121.91	238.533	106.827	1.74357	NA
JG-BH3-27	185.209	13592.9	1.02555	20.0458	9.01829	0.115292	10.2017	0.0167618	4.76913	0.467485		107.158	5.06826	110.795	10.7085	189.649	210.169	107.158	5.06826	NA
JG-BH3-15	1393.79	15085.2	1.90138	20.1879	1.53771	0.116142	1.80313	0.0170051	0.941668	0.522241		108.7	1.01501	111.568	1.90514	173.187	35.8957	108.7	1.01501	NA
JG-BH3-9	250.962	10730.6	2.62586	19.0198	8.6785	0.123927	8.79893	0.0170951	1.45083	0.164887		109.271	1.57197	118.626	9.8515	310.557	197.878	109.271	1.57197	NA
JG-BH3-33	276.68	10657.4	2.44669	21.2136	8.0627	0.111144	8.45117	0.0171001	2.53281	0.2997		109.302	2.74509	107.011	8.58365	56.315	192.552	109.302	2.74509	NA
JG-BH3-12	108.721	5606.11	1.14941	23.4597	22.7221	0.100796	23.0148	0.01715	3.65915	0.158991		109.619	3.9772	97.5105	21.4011	-189.371	574.287	109.619	3.9772	NA
JG-BH3-99	692.479	31680.7	1.68904	20.6453	3.78972	0.11511	3.89503	0.0172359	0.899605	0.230962		110.163	0.982614	110.629	4.08263	120.679	89.3434	110.163	0.982614	NA
JG-BH3-76	213.92	14122.1	3.38573	22.6589	8.09918	0.106289	8.219	0.0174674	1.39831	0.170132		111.63	1.54749	102.565	8.01824	-103.258	199.394	111.63	1.54749	NA
JG-BH3-66	188.172	6821.96	1.52502	19.1785	25.1167	0.127941	25.3794	0.0177961	3.64251	0.143522		113.712	4.10566	122.246	29.2385	291.652	581.823	113.712	4.10566	NA
JG-BH3-57	100.401	6434.85	1.39072	27.2217	19.9295	0.0910408	20.061	0.0179743	2.29341	0.114322		114.841	2.61044	88.4725	16.9988	-575.891	543.34	114.841	2.61044	NA
JG-BH3-16	202.498	13044.8	1.05964	20.6674	13.1587	0.120456	13.7636	0.0180556	4.03561	0.293209		115.355	4.61389	115.485	15.0254	118.139	311.347	115.355	4.61389	NA
JG-BH3-86	301.231	36770.1	1.11297	19.9124	8.83667	0.125228	8.90107	0.0180853	1.06879	0.120075		115.543	1.22392	119.801	10.0589	205.188	205.357	115.543	1.22392	NA
JG-BH3-65	62.5103	2911.31	0.992129	21.2664	47.7714	0.119008	48.4101	0.0183555	7.83737	0.161896		117.255	9.10661	114.172	52.3229	50.3822	1203.8	117.255	9.10661	NA
JG-BH3-90	234.04	8937.4	1.25461	21.3649	10.9742	0.119838	11.0954	0.0185692	1.63575	0.147426		118.607	1.92238	114.925	12.0568	39.3532	263.209	118.607	1.92238	NA
JG-BH3-48	146.598	4283.38	2.27685	26.9132	52.0064	0.0954629	52.0432	0.0186337	1.95637	0.0375912		119.015	2.30701	92.5796	46.0817	-545.154	1485.57	119.015	2.30701	NA
JG-BH3-44	192.69	8115.23	1.02936	19.9793	13.6305	0.130626	13.8648	0.0189282	2.5385	0.183089		120.879	3.03991	124.66	16.2664	197.421	317.958	120.879	3.03991	NA
JG-BH3-70	99.1426	4261.72	1.93854	28.1945	35.2774	0.0929166	35.6582	0.0190001	5.1973	0.145753		121.334	6.2471	90.2166	30.7913	-671.822	998.966	121.334	6.2471	NA
JG-BH3-109	237.95	18815.7	1.82051	20.5325	9.61746	0.129178	9.86181	0.0192367	2.18168	0.221225		122.83	2.65439	123.359	11.456	133.575	226.512	122.83	2.65439	NA
JG-BH3-51	349.246	43340	0.968345	20.2876	5.90292	0.131237	5.97515	0.01931	0.926221	0.155012		123.294	1.13112	125.208	7.03861	161.734	138.161	123.294	1.13112	NA
JG-BH3-18	830.044	67863.5	0.868458	20.7796	2.57817	0.128792	2.76038	0.01941	0.986267	0.357294		123.926	1.21057	123.012	3.19798	105.349	60.9113	123.926	1.21057	NA
JG-BH3-37	155.718	7609.41	1.42951	26.4691	16.618	0.105684	16.7532	0.0202884	2.12433	0.126801		129.478	2.7231	102.01	16.2609	-500.652	444.933	129.478	2.7231	NA
JG-BH3-104	101.122	7888.6	1.33051	20.0658	14.1669	0.139457	14.5255	0.0202953	3.20767	0.22083		129.522	4.11317	132.56	18.053	187.328	331.186	129.522	4.11317	NA
JG-BH3-23	252.112	21020.9	1.11895	21.4186	7.12436	0.139986	7.18887	0.0217458	0.960872	0.133661		138.68	1.3183	133.032	8.9637	33.297	170.819	138.68	1.3183	NA
JG-BH3-74	96.1225	9754.39	2.54865	25.2836	27.8278	0.119115	27.9541	0.0218426	2.65401	0.0949417		139.29	3.65712	114.269	30.22	-380.144	734.543	139.29	3.65712	NA
JG-BH3-53	32.4525	2782.59	1.67252	11.825	173.312	0.258398	173.448	0.0221609	6.86546	0.0395823		141.299	9.59526	233.375	378.206	1305.61	532.469	141.299	9.59526	NA
JG-BH3-10	337.616	21096.5	1.43141	21.0423	5.75745	0.145635	5.98201	0.0222258	1.62361	0.271416		141.708	2.27568	138.05	7.72154	75.5808	136.895	141.708	2.27568	NA
JG-BH3-3	67.8515	7257.94	1.77713	32.391	33.0054	0.0955107	33.8736	0.0224375	7.62011	0.224957		143.043	10.78	92.6239	29.9953	NA	NA	143.043	10.78	NA
JG-BH3-1	294.089	22618.9	3.31081	19.9698	4.94463	0.154944	5.0829	0.0224413	1.17751	0.231662		143.066	1.66607	146.268	6.92408	198.525	114.908	143.066	1.66607	NA
JG-BH3-14	109.297	11838.5	1.61188	20.5216	13.4095	0.153501	13.7475	0.0228466	3.02974	0.220386		145.621	4.36249	144.998	18.5778	134.834	316.372	145.621	4.36249	NA
JG-BH3-49	147	11564.5	2.62901	20.9744	18.5907	0.152117	18.7737	0.0231402	2.61523	0.139303		147.471	3.81294	143.779	25.1739	83.2545	444.416	147.471	3.81294	NA
JG-BH3-92	86.8916	8620.74	1.96474	21.2897	17.9908	0.14993	19.7259	0.0231503	8.08955	0.410098		147.535	11.7994	141.85	26.1204	47.7532	432.737	147.535	11.7994	NA
JG-BH3-96	185.223	18171.7	4.36761	24.5321	23.2372	0.130445	23.3434	0.0232092	2.22463	0.0953		147.906	3.2529	124.497	27.3575	-302.386	600.86	147.906	3.2529	NA
JG-BH3-1	362.177	31247.4	1.06107	20.2126	4.84524	0.159444	4.94065	0.0233738	0.966237	0.195569		148.943	1.42265	150.217	6.8989	170.338	113.186	148.943	1.42265	NA
JG-BH3-101	527.177	67396.1	1.33045	19.8611	3.7151	0.163542	3.80808	0.0235576	0.836372	0.219631		150.101	1.2409	153.798	5.43484	211.165	86.101	150.101	1.2409	NA
JG-BH3-34	252.994	16988.8	1.89552	21.7384	9.75924	0.149673	9.92874	0.0235977	1.82682	0.183993		150.353	2.7149	141.623	13.1255	-2.27987	235.797	150.353	2.7149	NA
JG-BH3-58	626.055	36745.4	1.47945	20.1853	3.50167	0.161737	3.59403	0.0236779	0.809545	0.225247		150.858	1.20709	152.223	5.08062	173.497	81.7191	150.858	1.20709	NA
JG-BH3-67	252.835	18079	1.1579	22.2488	8.47866	0.146808	8.71052	0.0236895	1.99638	0.229192		150.932	2.97816	139.09	11.3227	-58.5468	206.966	150.932	2.97816	NA
JG-BH3-93	847.716	65937.1	1.68654	20.3523	1.66737	0.160847	1.8076	0.0237424	0.69808	0.386191		151.265	1.04366	151.444	2.54315	154.226	39.0497	151.265	1.04366	NA
JG-BH3-39	98.2777	5444.6	0.94072	22.3201	21.7024	0.147594	22.1702	0.0238927	4.53023	0.204338		152.211	6.81473	139.785	28.96	-66.3541	535.122	152.211	6.81473	NA
JG-BH3-26	138.365	16458.3	0.970612	20.5081	13.5125	0.16236	14.1426	0.0241491	4.17444	0.295168		153.825	6.34534	152.767	20.061	136.347	318.728	153.825	6.34534	NA
JG-BH3-62	149.62	13885.9	0.814413	19.5432	16.2336	0.170413	16.349	0.0241544	1.93946	0.118629		153.858	2.94869	159.777	24.175	248.462	375.834	153.858	2.94869	NA
JG-BH3-89	269.245	21299.1	3.57913	23.8438	8.85969	0.140996	9.26334	0.0243825	2.70469	0.291978		155.294	4.15004	133.93	11.6235	-230.133	223.671	155.294	4.15004	NA
JG-BH3-50	128.685	6983.71	1.68493	17.3005	17.8882	0.195184	17.9932	0.0244907	1.9409	0.107868		155.975	2.99099	181.043	29.8451	522.239	395.276	155.975	2.99099	NA
JG-BH3-73	84.0815	11168.3	2.91507	27.7539	22.5597	0.121816	22.7465	0.0245204	2.90915	0.127894		156.162	4.4884	116.717	25.0851	-628.55	623.293	156.162	4.4884	NA
JG-BH3-88	55.0189	5296.43	1.2563	27.9405	29.3076	0.121562	30.0925	0.0246339	6.82789	0.226897		156.876	10.582	116.487	33.1297	-646.913	818.79	156.876	10.582	NA
JG-BH3-29	711.151	41707.5	1.37864	20.5863	2.46829	0.166888	2.65377	0.0249173	0.974702	0.367289		158.659	1.52757	156.714	3.85381	127.44	58.0755	158.659	1.52757	NA
JG-BH3-17	37.7617	8245.55	0.84324	16.5076	32.4315	0.209223	33.1641	0.0250491	6.93236	0.209032		159.487	10.9206	192.9	58.3281	624.268	717.022	159.487	10.9206	NA
JG-BH3-103	91.1873	6705.44	1.21614	23.0075	16.5619	0.153032	16.8116	0.0255359	2.88657	0.171701		162.548	4.63341	144.586	22.6596	-140.933	412.531	162.548	4.63341	NA
JG-BH3-80	73.8545	6514.2	1.4354	23.781	16.9936	0.148436	17.1862	0.0256017	2.56572	0.14929		162.962	4.12874	140.53	22.5587	-223.491	430.304	162.962	4.12874	NA
JG-BH3-5	347.345	81814.7	1.17996	20.8591	4.64714	0.170192	5.13655	0.0257474	2.18819	0.426004		163.878	3.54076	159.586	7.58563	96.3423	110.039	163.878	3.54076	NA
JG-BH3-107	259.154	32403.9	0.975669	20.4004	7.88848	0.176282	7.95752	0.0260823	1.04595	0.131442		165.982	1.71393	164.856	12.1094	148.699	185.147	165.982	1.71393	NA
JG-BH3-60	71.1392	4721.83	1.5875	22.5825	30.0728	0.160023	30.1734	0.0262091	2.46281	0.0816217		166.779	4.05476	150.723	42.2884	-94.9642	752.738	166.779	4.05476	NA
JG-BH3-13	88.0414	7328.51	3.49458	24.6853	17.2743	0.151275	18.1659	0.0270834	5.62124	0.30944		172.268	9.55538	143.037	24.2413	-318.33	445.851	172.268	9.55538	NA
JG-BH3-55	149.452	14333.7	1.44755	20.9596	11.4801	0.181185	11.5949	0.0275426	1.62787	0.140396		175.15	2.81283	169.08	18.0612	84.9772	273.066	175.15	2.81283	NA
JG-BH3-45	237.234	19694.3	2.38947	19.7088	6.86724	0.194165	7.86049	0.0277542	3.8247	0.486573		176.477	6.65818	180.177	12.9781	228.962	158.785	176.477	6.65818	NA
JG-BH3-68	210.925	45300.6	1.50415	20.1581	5.02892	0.20033	5.19411	0.0292884	1.29953	0.250192		186.093	2.38375	185.406	8.80234	176.636	117.349	186.093	2.38375	NA
JG-BH3-59	149.455	48018.2	1.12876	18.5912	4.31664	0.26619	4.84922	0.035892	2.20942	0.455623		227.319	4.93491	239.643	10.3516	362.196	97.393	227.319	4.93491	NA
JG-BH3-91	43.6049	5959.61	2.35536	17.3536	32.0221	0.295094	32.5089	0.0371405	5.60492	0.172412		235.084	12.9389	262.561	75.3507	515.508	720.377	235.084	12.9389	NA
JG-BH3-82	62.5491	4316.99	1.15642	20.7647	34.937	0.249093	35.1398	0.0375134	3.76977	0.107279		237.401	8.78671	225.839	71.2703	107.092	848.299	237.401	8.78671	NA
JG-BH3-87	31.8915	4061.18	3.18197	20.6135	35.2793	0.348954	35.7649	0.0521697	5.87368	0.16423		327.828	18.7742	303.934	94.2109	124.286	854.431	327.828	18.7742	NA
JG-BH3-77	49.0867	9505.98	2.11023	17.1054	9.3027	0.633015	13.228	0.0785319	9.40423	0.710934		487.354	44.143	497.973	52.1109	547.063	203.593	487.354	44.143	89.0855
JG-BH3-84	93.5332	71885	2.36339	13.654	2.23093	1.76306	2.29229	0.174592	0.526818	0.229822		1037.36	5.04796	1031.97	14.8528	1020.55	45.1895	1020.55	45.1895	101.647
JG-BH3-110	101.661	57477.5	2.40215	12.4355	0.9906	2.26307	1.40201	0.204108	0.992141	0.707656		1197.35	10.8414	1200.86	9.87339	1207.2	19.4901	1207.2	19.4901	99.1844
JG-BH3-100	345.017	156947	1.17058	12.2399	0.533035	2.40673	0.749045	0.213651	0.526254	0.702566		1248.24	5.97206	1244.61	5.37319	1238.36	10.4681	1238.36	10.4681	100.798
JG-BH3-41	369.556	183466	3.28497	11.3731	0.588238	2.87664	0.897912	0.23728	0.678397	0.755527		1372.54	8.38677	1375.81	6.7655	1380.88	11.3028	1380.88	11.3028	99.3963
JG-BH3-83	111.018	64718.7	2.26013	11.0825	0.828741	3.08774	3.02592	0.248187	2.91022	0.961764		1429.12	37.3033	1429.65	23.2124	1430.43	15.8171	1430.43	15.8171	99.9083
JG-BH3-36	32.3183	29640.8	3.17965	10.9027	2.41683	3.15508	2.87021	0.249483	1.54825	0.539419		1435.81	19.9284	1446.24	22.1332	1461.59	45.939	1461.59	45.939	98.2361
JG-BH3-106	103.286	44362.9	0.6888	10.107	0.64428	3.97561	1.26647	0.291423	1.09035	0.860932		1648.64	15.8613	1629.23	10.2754	1604.25	12.0161	1604.25	12.0161	102.767
JG-BH3-3	204.607	89846.9	1.21069	9.15041	0.483489	4.7298	1.28009	0.313893	1.18527	0.925928		1759.84	18.2541	1772.54	10.7298	1787.51	8.8089	1787.51	8.8089	98.452
JG-BH3-94	124.371	82419.2	1.30281	9.10195	0.441377	4.8821	6.21413	0.322285	6.19843	0.997474		1800.88	97.3976	1799.17	52.4167	1797.18	8.03371	1797.18	8.03371	100.206
JG-BH3-97	139.648	147638	0.941391	5.81617	0.273491	11.787	0.595828	0.497209	0.529352	0.888431		2601.79	11.3323	2587.63	5.57686	2576.55	4.56973	2576.55	4.56973	100.98
JG-BH6
JG-BH6_58	234.848	5757.07	0.814857	29.7456	52.0123	0.0184651	52.4746	0.00398358	6.95032	0.132451		25.6288	1.77775	18.5782	9.66046	-822.033	1573.42	25.6288	1.77775	NA
JG-BH6_82	288.912	12776	0.766391	22.888	19.5628	0.0399498	19.7479	0.00663166	2.69746	0.136595		42.6093	1.14558	39.7751	7.70303	-128.054	487.177	42.6093	1.14558	NA
JG-BH6_61	107.159	11221.5	1.84257	24.9295	27.1216	0.0639782	27.4222	0.0115676	4.04943	0.147669		74.1417	2.98511	62.9689	16.7445	-343.647	710.078	74.1417	2.98511	NA
JG-BH6_51	1435.06	4652.67	4.18004	18.7501	1.86314	0.0864942	4.72947	0.0117622	4.34703	0.919135		75.3818	3.25778	84.2323	3.823	342.982	42.1479	75.3818	3.25778	NA
JG-BH6_118	1421.49	4494.31	1.61121	18.8453	2.04139	0.0916284	7.73051	0.0125237	7.4561	0.964504		80.2315	5.94507	89.0192	6.58869	331.511	46.278	80.2315	5.94507	NA
JG-BH6_109	731.792	26266.8	0.475376	20.162	2.62185	0.0899997	3.61586	0.0131606	2.49005	0.688646		84.285	2.08508	87.5031	3.0315	176.181	61.1489	84.285	2.08508	NA
JG-BH6_41	768.804	7750.92	1.31251	19.3893	9.36322	0.0947216	9.80215	0.0133202	2.9004	0.295894		85.3004	2.45775	91.8922	8.61206	266.588	215.235	85.3004	2.45775	NA
JG-BH6_59	966.482	117148	1.46954	20.8022	3.30957	0.0896019	3.35643	0.0135184	0.558893	0.166514		86.5615	0.480553	87.1325	2.80258	102.787	78.258	86.5615	0.480553	NA
JG-BH6_50	414.983	23902	1.02082	21.0836	5.69875	0.0896168	6.6147	0.0137035	3.35834	0.507709		87.7388	2.92661	87.1463	5.52407	70.9509	135.621	87.7388	2.92661	NA
JG-BH6_93	270.767	8229.62	1.54697	20.1676	15.1503	0.0947961	15.9204	0.0138657	4.89161	0.307255		88.7702	4.31253	91.9613	13.9981	175.543	355.14	88.7702	4.31253	NA
JG-BH6_37	318.105	85268.6	1.63111	21.051	12.1477	0.0921935	12.2815	0.0140758	1.80798	0.147212		90.1057	1.61776	89.5447	10.5269	74.6179	289.605	90.1057	1.61776	NA
JG-BH6_11	627.127	21904.7	1.11644	20.8036	2.71044	0.0941816	3.53577	0.0142103	2.2705	0.642153		90.9608	2.05077	91.3913	3.09024	102.627	64.0714	90.9608	2.05077	NA
JG-BH6_90	248.686	34436.5	0.640245	20.7835	4.85623	0.0958888	5.08798	0.0144539	1.51808	0.298367		92.5091	1.39434	92.9743	4.52043	104.912	114.803	92.5091	1.39434	NA
JG-BH6_92	432.138	71897.7	1.38425	20.8078	6.94829	0.096072	7.1379	0.0144984	1.63428	0.228958		92.7918	1.50561	93.144	6.35278	102.161	164.441	92.7918	1.50561	NA
JG-BH6_98	779.313	132076	1.01032	20.878	1.64598	0.0959226	1.94139	0.0145247	1.02944	0.530259		92.9588	0.95009	93.0056	1.72538	94.2259	38.9843	92.9588	0.95009	NA
JG-BH6_101	394.185	3186.95	0.505436	17.8547	9.79283	0.112264	10.3887	0.0145376	3.46779	0.333804		93.0407	3.20329	108.034	10.6473	452.648	217.883	93.0407	3.20329	NA
JG-BH6_36	460.898	42850.5	1.60127	20.6954	3.99305	0.0977999	4.17331	0.0146795	1.2133	0.290728		93.9421	1.13153	94.7434	3.7751	114.942	94.2334	93.9421	1.13153	NA
JG-BH6_113	267.356	22328.5	1.38517	23.1291	10.4703	0.0879465	10.6759	0.0147528	2.0848	0.195282		94.4082	1.95388	85.5886	8.76302	-154.002	260.564	94.4082	1.95388	NA
JG-BH6_116	360.101	13956.7	1.15889	20.2	8.76594	0.10111	9.18382	0.014813	2.73876	0.298216		94.7902	2.57709	97.8	8.56299	171.793	204.936	94.7902	2.57709	NA
JG-BH6_56	151.767	19348.2	1.16883	19.4835	12.6468	0.105215	12.7938	0.0148676	1.93393	0.151161		95.1375	1.82638	101.579	12.3675	255.469	291.75	95.1375	1.82638	NA
JG-BH6_40	406.93	4606.07	2.54365	18.5388	9.91778	0.111311	10.0446	0.0149664	1.59104	0.158398		95.7647	1.51239	107.164	10.216	368.566	223.927	95.7647	1.51239	NA
JG-BH6_24	655.001	77709.4	0.711835	21.4492	3.54015	0.0963467	3.77527	0.0149881	1.31148	0.347387		95.9026	1.24843	93.3985	3.36875	29.875	84.8729	95.9026	1.24843	NA
JG-BH6_87	233.385	39610.8	1.47013	20.2687	12.2046	0.103276	12.2407	0.0151818	0.93877	0.0766926		97.1327	0.905017	99.7959	11.6351	163.867	286.204	97.1327	0.905017	NA
JG-BH6_42	274.181	21807.8	1.63598	21.0471	4.67866	0.0996205	6.37268	0.0152069	4.32679	0.67896		97.2918	4.17801	96.426	5.86223	75.0507	111.219	97.2918	4.17801	NA
JG-BH6_100	950.307	6701.15	1.42259	19.3289	1.72488	0.108655	2.38959	0.015232	1.65377	0.692072		97.4513	1.5995	104.735	2.37798	273.741	39.512	97.4513	1.5995	NA
JG-BH6_119	604.191	39745.5	1.01421	21.3064	4.23683	0.0988563	4.37367	0.0152761	1.08546	0.248182		97.7314	1.05284	95.72	3.99522	45.8966	101.273	97.7314	1.05284	NA
JG-BH6_94	217.407	24059.5	0.582633	20.346	12.7224	0.103624	12.8428	0.0152911	1.75447	0.136611		97.8265	1.70338	100.116	12.2447	155	298.928	97.8265	1.70338	NA
JG-BH6_17	742.998	51426.4	2.16552	21.1158	3.76343	0.100109	3.93548	0.0153314	1.15091	0.292446		98.0825	1.1203	96.8774	3.63637	67.2899	89.5965	98.0825	1.1203	NA
JG-BH6_54	493.394	28548.4	1.58759	21.8603	5.85249	0.0974558	5.94019	0.0154512	1.01696	0.171201		98.8431	0.997532	94.4251	5.35617	-15.7765	141.597	98.8431	0.997532	NA
JG-BH6_72	519.306	56205.7	1.81509	20.6946	4.04391	0.103634	4.08666	0.0155546	0.589602	0.144275		99.4996	0.582147	100.125	3.89653	115.027	95.4217	99.4996	0.582147	NA
JG-BH6_25	968.172	11623.9	1.79415	19.4398	3.67779	0.111048	4.07681	0.0156567	1.75904	0.431474		100.148	1.74802	106.923	4.13742	260.658	84.5192	100.148	1.74802	NA
JG-BH6_63	431.791	1350.47	1.43143	14.0592	31.6102	0.153704	32.3494	0.0156727	6.8762	0.21256		100.249	6.84003	145.177	43.7881	961.104	661.936	100.249	6.84003	NA
JG-BH6_32	156.848	19603.8	1.19224	27.1174	20.0579	0.0807657	20.5829	0.0158845	4.61894	0.224407		101.594	4.65577	78.8646	15.6194	-565.517	545.691	101.594	4.65577	NA
JG-BH6_108	397.663	41678.1	1.68061	21.0041	6.1433	0.105502	6.25509	0.0160718	1.17732	0.188217		102.781	1.20047	101.842	6.06135	79.8956	145.965	102.781	1.20047	NA
JG-BH6_83	1028.98	55965.7	2.15932	21.0771	3.45579	0.105754	3.75577	0.0161662	1.47082	0.391615		103.38	1.50841	102.074	3.64728	71.7014	82.201	103.38	1.50841	NA
JG-BH6_84	1210.38	4041.25	3.34427	19.2602	2.93	0.116607	3.67005	0.0162887	2.21006	0.602188		104.157	2.28344	111.991	3.8916	281.93	67.0498	104.157	2.28344	NA
JG-BH6_89	195.635	13665	1.53249	19.8726	12.7329	0.113238	12.8568	0.016321	1.78019	0.138464		104.362	1.84289	108.923	13.2798	209.847	296.175	104.362	1.84289	NA
JG-BH6_67	100.547	11593.7	3.38677	20.4907	21.9712	0.109894	22.2727	0.0163317	3.65216	0.163975		104.43	3.78323	105.869	22.3958	138.359	521.47	104.43	3.78323	NA
JG-BH6_91	502.366	56598.1	1.8261	21.4161	3.07096	0.105752	3.2776	0.0164258	1.14535	0.349448		105.027	1.19319	102.072	3.18286	33.5953	73.5688	105.027	1.19319	NA
JG-BH6_12	304.583	11345.5	1.23044	20.0964	9.50314	0.11319	9.65253	0.0164979	1.69162	0.175252		105.484	1.76988	108.88	9.9661	183.776	221.75	105.484	1.76988	NA
JG-BH6_45	627.449	21704.9	1.14032	20.9549	3.00045	0.108624	3.17986	0.0165087	1.05298	0.331142		105.553	1.1024	104.706	3.1636	85.5036	71.1894	105.553	1.1024	NA
JG-BH6_102	319.466	27082.3	1.57403	20.5463	5.29631	0.110795	5.57981	0.0165102	1.75595	0.314697		105.562	1.83853	106.692	5.65117	131.985	124.623	105.562	1.83853	NA
JG-BH6_66	88.0093	16076.9	2.47766	27.4186	21.9062	0.08346	22.1097	0.0165967	2.99258	0.135352		106.111	3.14947	81.3928	17.295	-595.416	600.672	106.111	3.14947	NA
JG-BH6_55	286.473	28340.8	1.37363	20.0664	7.38081	0.114081	7.51851	0.0166028	1.43235	0.19051		106.15	1.50799	109.692	7.81748	187.263	171.979	106.15	1.50799	NA
JG-BH6_1	159.656	25006.6	1.58598	23.3575	13.982	0.0983645	14.1817	0.0166634	2.3715	0.167223		106.534	2.50569	95.2655	12.8965	-178.462	350.239	106.534	2.50569	NA
JG-BH6_44	547.627	10536.1	1.19397	20.2214	5.1187	0.114243	5.30545	0.0167549	1.39524	0.262983		107.114	1.48215	109.84	5.52341	169.316	119.603	107.114	1.48215	NA
JG-BH6_104	416.32	51888.9	1.64335	20.1893	6.62082	0.114481	7.57153	0.0167631	3.67325	0.48514		107.166	3.90394	110.056	7.8974	173.034	154.68	107.166	3.90394	NA
JG-BH6_29	369.33	859.34	1.65339	14.5502	21.5951	0.160793	21.9624	0.0169682	3.99987	0.182123		108.466	4.30221	151.397	30.8999	890.594	451.027	108.466	4.30221	NA
JG-BH6_22	596.722	46311.1	1.87705	19.6152	7.52509	0.121105	7.82293	0.0172288	2.13805	0.273306		110.118	2.33438	116.073	8.58075	239.952	173.676	110.118	2.33438	NA
JG-BH6_114	608.114	123444	1.61763	20.3629	2.45614	0.116731	2.93564	0.0172394	1.6079	0.547717		110.185	1.75662	112.104	3.1158	153.04	57.5416	110.185	1.75662	NA
JG-BH6_57	230.115	22619.9	1.63734	19.2751	9.61302	0.123883	9.75312	0.0173183	1.64715	0.168884		110.685	1.80759	118.586	10.9164	280.168	220.473	110.685	1.80759	NA
JG-BH6_74	352.473	39215.6	1.74661	20.7439	7.62451	0.115215	7.77132	0.017334	1.50342	0.193457		110.785	1.65133	110.725	8.15241	109.418	180.256	110.785	1.65133	NA
JG-BH6_85	475.617	52879.9	1.53462	20.7367	3.38888	0.115671	3.66091	0.0173965	1.38483	0.378274		111.181	1.52646	111.14	3.85397	110.282	80.0452	111.181	1.52646	NA
JG-BH6_21	308.265	31744.4	2.45227	21.0484	4.44994	0.114894	4.68352	0.0175394	1.46061	0.311862		112.086	1.62299	110.433	4.90083	74.9215	105.778	112.086	1.62299	NA
JG-BH6_52	320.548	8269.94	1.84212	20.5278	7.99443	0.117831	8.14413	0.017543	1.55431	0.190851		112.109	1.72746	113.104	8.71706	134.111	188.148	112.109	1.72746	NA
JG-BH6_88	283.302	29593.5	1.13523	20.4077	8.51307	0.11853	8.73398	0.0175437	1.95194	0.223487		112.113	2.16946	113.738	9.39799	147.887	199.883	112.113	2.16946	NA
JG-BH6_97	121.848	27619.8	1.12691	18.6518	15.286	0.130907	15.8054	0.0177086	4.0185	0.254249		113.158	4.50757	124.913	18.5789	354.861	347.011	113.158	4.50757	NA
JG-BH6_78	819.14	156345	1.02494	20.6684	1.98899	0.119063	2.07433	0.0178477	0.588865	0.283882		114.039	0.665632	114.223	2.24095	118.023	46.8964	114.039	0.665632	NA
JG-BH6_77	383.389	38635.8	1.77618	21.7309	6.52832	0.113774	6.60736	0.0179315	1.01898	0.154219		114.57	1.15713	109.412	6.85345	-1.44272	157.545	114.57	1.15713	NA
JG-BH6_28	826.454	16144.9	2.24565	20.0905	2.22381	0.123397	3.52783	0.0179802	2.73867	0.776303		114.878	3.11826	118.147	3.93469	184.461	51.7718	114.878	3.11826	NA
JG-BH6_86	610.317	46883.5	3.55363	20.7403	2.02758	0.119673	2.22138	0.0180016	0.907441	0.408503		115.014	1.03443	114.776	2.41079	109.857	47.8823	115.014	1.03443	NA
JG-BH6_76	265.051	40096.6	1.34486	20.7147	4.44823	0.119907	4.54422	0.0180144	0.929075	0.204452		115.095	1.05983	114.987	4.9403	112.762	105.015	115.095	1.05983	NA
JG-BH6_10	1212.25	12660.6	2.05087	19.99	3.01125	0.124936	4.42205	0.0181134	3.23834	0.732317		115.721	3.71402	119.537	4.98674	196.179	69.969	115.721	3.71402	NA
JG-BH6_3	78.6747	15242.9	1.96372	20.6216	26.0809	0.122725	26.4553	0.018355	4.43497	0.16764		117.251	5.15304	117.539	29.3713	123.357	623.481	117.251	5.15304	NA
JG-BH6_31	154.306	17993.1	2.28186	22.5087	16.7394	0.113677	16.82	0.0185575	1.64534	0.0978205		118.533	1.93246	109.323	17.4346	-86.9263	412.673	118.533	1.93246	NA
JG-BH6_49	53.1341	2370.33	1.66281	18.2859	36.2695	0.140577	37.2035	0.0186436	8.28431	0.222675		119.078	9.77422	133.558	46.5918	399.431	838.173	119.078	9.77422	NA
JG-BH6_34	330.088	36725.5	1.1791	19.5503	4.35322	0.132133	4.37752	0.0187354	0.460601	0.105219		119.659	0.546066	126.013	5.18772	247.611	100.265	119.659	0.546066	NA
JG-BH6_69	288.05	27651.9	1.11244	20.7831	6.82211	0.125219	7.96109	0.0188746	4.10339	0.51543		120.54	4.90026	119.793	8.99595	104.959	161.364	120.54	4.90026	NA
JG-BH6_120	279.149	30530.7	1.87054	20.3518	8.10166	0.129214	8.35381	0.0190726	2.03697	0.243837		121.792	2.45757	123.391	9.70644	154.29	189.991	121.792	2.45757	NA
JG-BH6_95	131.082	32455.9	1.15153	23.1778	19.3398	0.114106	19.5066	0.0191813	2.54517	0.130478		122.479	3.08788	109.714	20.2885	-159.224	484.473	122.479	3.08788	NA
JG-BH6_9	106.114	30942.4	1.86539	19.1516	16.9654	0.139383	17.2251	0.0193604	2.97953	0.172976		123.612	3.64798	132.494	21.399	294.808	389.716	123.612	3.64798	NA
JG-BH6_71	307.411	2716.75	1.50512	18.0588	4.39754	0.147964	6.76203	0.0193796	5.1368	0.759654		123.734	6.29536	140.113	8.85006	427.356	98.1032	123.734	6.29536	NA
JG-BH6_62	189.548	19674.4	1.83589	21.0062	20.8469	0.129354	21.044	0.0197072	2.87346	0.136545		125.805	3.57991	123.517	24.4788	79.6662	499.645	125.805	3.57991	NA
JG-BH6_13	120.434	10368.1	2.70467	21.379	22.6682	0.129034	22.8482	0.0200075	2.86279	0.125296		127.703	3.61989	123.23	26.5204	37.7222	548.524	127.703	3.61989	NA
JG-BH6_4	154.484	38332.2	1.67248	19.2393	8.71981	0.146066	9.72647	0.0203815	4.30918	0.443037		130.066	5.54864	138.432	12.5877	284.407	199.732	130.066	5.54864	NA
JG-BH6_14	111.905	10776.1	1.20394	23.2762	17.4735	0.123459	17.5345	0.0208417	1.46133	0.0833402		132.974	1.92328	118.203	19.5678	-169.774	437.968	132.974	1.92328	NA
JG-BH6_2	79.4443	15982.1	1.65525	22.2126	17.2797	0.133267	17.4842	0.0214695	2.66644	0.152506		136.937	3.61282	127.029	20.8799	-54.5747	423.515	136.937	3.61282	NA
JG-BH6_75	265.686	36645.8	1.66586	20.2661	3.64085	0.147021	3.8209	0.0216096	1.15908	0.303353		137.821	1.5805	139.278	4.97287	164.166	85.1313	137.821	1.5805	NA
JG-BH6_103	71.4059	10872.5	1.36925	24.6037	25.0666	0.123793	25.3074	0.02209	3.48326	0.137638		140.851	4.85302	118.505	28.3139	-309.845	650.355	140.851	4.85302	NA
JG-BH6_7	185.231	18014.7	2.91426	21.3518	11.3474	0.143531	11.4317	0.0222269	1.38588	0.121231		141.715	1.94257	136.184	14.5703	40.8119	272.158	141.715	1.94257	NA
JG-BH6_15	187.722	20041	3.25843	20.5622	5.94398	0.151364	6.12607	0.0225731	1.48252	0.242001		143.897	2.10967	143.115	8.1777	130.178	139.902	143.897	2.10967	NA
JG-BH6_107	73.7363	9612.09	2.10014	20.5174	18.0604	0.153039	18.7953	0.0227731	5.20448	0.276904		145.158	7.47032	144.591	25.3353	135.317	427.425	145.158	7.47032	NA
JG-BH6_79	174.268	21338.3	1.60332	20.0932	2.61266	0.157399	3.31868	0.0229376	2.04637	0.616623		146.195	2.95803	148.423	4.58264	184.152	60.8727	146.195	2.95803	NA
JG-BH6_39	76.0061	8924.86	3.22799	21.1557	29.6575	0.149564	29.807	0.0229485	2.98155	0.100029		146.263	4.31182	141.527	39.3967	62.8306	720.232	146.263	4.31182	NA
JG-BH6_35	150.87	31421.3	0.966988	20.2529	11.1295	0.156961	11.2594	0.0230557	1.70569	0.15149		146.939	2.47797	148.04	15.5115	165.683	260.755	146.939	2.47797	NA
JG-BH6_27	496.54	42180.4	0.859007	20.3772	3.15836	0.157325	3.6894	0.0232509	1.90695	0.516872		148.169	2.79328	148.359	5.0925	151.399	74.0256	148.169	2.79328	NA
JG-BH6_8	410.046	22211.5	1.37149	20.1812	4.30338	0.159193	4.40348	0.0233007	0.933589	0.212012		148.482	1.37037	149.996	6.14043	173.971	100.438	148.482	1.37037	NA
JG-BH6_70	49.786	19426.6	2.83495	20.8767	25.4959	0.156081	26.7566	0.0236325	8.11645	0.303344		150.573	12.0796	147.267	36.6954	94.3232	612.345	150.573	12.0796	NA
JG-BH6_26	467.746	62188.5	1.48854	18.8791	7.48452	0.174571	7.61563	0.0239031	1.40705	0.184759		152.276	2.1175	163.379	11.4934	327.447	170.09	152.276	2.1175	NA
JG-BH6_16	399.461	33494.4	0.55712	19.5548	3.072	0.176386	3.19956	0.0250159	0.894439	0.27955		159.279	1.40719	164.946	4.87123	247.07	70.7462	159.279	1.40719	NA
JG-BH6_117	562.27	199980	2.01648	20.0525	3.26632	0.172662	3.39551	0.025111	0.927696	0.273213		159.877	1.46493	161.727	5.07648	188.873	76.0238	159.877	1.46493	NA
JG-BH6_73	38.1368	9841.92	1.90445	22.9399	131.537	0.151628	131.586	0.0252272	3.59577	0.0273263		160.607	5.70373	143.348	177.709	-133.651	1455.1	160.607	5.70373	NA
JG-BH6_111	184.84	17404.5	2.45316	19.6672	10.4389	0.177546	10.4916	0.0253251	1.05026	0.100104		161.223	1.67226	165.947	16.0636	233.886	241.496	161.223	1.67226	NA
JG-BH6_43	380.891	65578.2	1.67899	20.5276	4.23361	0.172495	6.51606	0.0256811	4.95334	0.760174		163.461	7.99499	161.582	9.73407	134.129	99.5741	163.461	7.99499	NA
JG-BH6_60	201.989	15266.8	1.29696	19.0917	5.38916	0.188147	5.89962	0.0260519	2.40051	0.406893		165.791	3.92909	175.047	9.48623	301.98	122.942	165.791	3.92909	NA
JG-BH6_5	300.411	14006.4	2.36332	19.9507	5.51579	0.180699	5.83754	0.0261465	1.91126	0.327408		166.385	3.13936	168.662	9.0717	200.728	128.166	166.385	3.13936	NA
JG-BH6_110	458.542	34655.7	2.82156	19.2965	4.65026	0.18846	4.69989	0.0263753	0.681198	0.144939		167.823	1.12845	175.315	7.56765	277.623	106.533	167.823	1.12845	NA
JG-BH6_53	342.01	6929.68	1.90977	18.606	3.96056	0.196375	6.49193	0.0264996	5.14384	0.792344		168.603	8.56024	182.054	10.8203	360.4	89.3913	168.603	8.56024	NA
JG-BH6_30	152.298	37758.1	1.27226	19.7517	7.01918	0.185986	7.12006	0.026643	1.19431	0.167739		169.504	1.99802	173.199	11.3379	223.977	162.443	169.504	1.99802	NA
JG-BH6_6	217.934	37571.1	1.50063	19.6311	8.13421	0.187982	8.17794	0.0267645	0.844604	0.103278		170.267	1.41925	174.906	13.1403	238.113	187.857	170.267	1.41925	NA
JG-BH6_105	271.929	32619.1	0.797304	20.4902	4.972	0.180426	5.22377	0.026813	1.60221	0.306715		170.571	2.69706	168.427	8.10746	138.404	116.821	170.571	2.69706	NA
JG-BH6_47	150.553	36168.4	1.71228	19.0406	10.821	0.217676	11.0129	0.0300601	2.0471	0.185882		190.924	3.85111	199.973	19.9925	308.062	247.052	190.924	3.85111	NA
JG-BH6_48	1176.94	77877.3	3.81716	19.4472	1.11784	0.259717	1.34874	0.0366316	0.754665	0.559536		231.92	1.71911	234.438	2.82348	259.735	25.6792	231.92	1.71911	NA
JG-BH6_20	170.856	59895.6	1.2193	19.1041	6.41982	0.28746	6.49514	0.0398294	0.986242	0.151843		251.776	2.43525	256.558	14.7263	300.518	146.531	251.776	2.43525	NA
JG-BH6_68	231.024	64061.5	3.5274	15.1224	1.76777	0.515643	5.12038	0.0565547	4.80555	0.938514		354.639	16.5821	422.237	17.69	810.378	36.981	354.639	16.5821	NA
JG-BH6_99	334.146	13052.6	1.74895	17.7039	4.1102	0.462852	4.35708	0.0594307	1.44582	0.331833		372.162	5.22843	386.24	13.9989	471.46	90.9902	372.162	5.22843	NA
JG-BH6_115	1053.69	16746.1	0.784391	17.5872	1.06957	0.524932	5.50136	0.0669573	5.39639	0.980918		417.798	21.831	428.441	19.2311	486.078	23.6098	417.798	21.831	85.953
JG-BH6_46	281.606	161035	2.45594	12.3005	0.484252	2.28761	1.21901	0.204082	1.11869	0.91771		1197.21	12.223	1208.47	8.61287	1228.63	9.50709	1228.63	9.50709	97.4428
JG-BH6_106	301.967	53922	0.806031	10.3983	1.27498	3.44526	2.54946	0.259825	2.20775	0.865969		1488.95	29.3523	1514.79	20.0659	1551.08	23.9438	1551.08	23.9438	95.9943
JG-BH6_23	99.5352	275385	1.41235	9.14466	0.60625	4.80973	0.891656	0.318998	0.653843	0.733291		1784.83	10.1938	1786.6	7.49549	1788.65	11.0445	1788.65	11.0445	99.7864
JG-BH6_79	72.0365	87343.6	0.647871	8.36836	1.48632	5.61617	3.35694	0.340862	3.00997	0.89664		1890.82	49.3269	1918.58	28.9418	1948.71	26.5621	1948.71	26.5621	97.0292
JG-BH7
JG_BH-7_76	122.212	822.095	0.738481	2.15423	748.558	0.119007	749.433	0.00185937	36.1951	0.0482966		11.9751	4.33038	114.172	1107.19	4131.36	200.081	11.9751	4.33038	NA
JG_BH-7_73	265.322	152.471	0.801362	19.0938	49.5166	0.0143508	50.3543	0.00198732	9.14694	0.181652		12.7984	1.1695	14.468	7.23374	301.747	1199.25	12.7984	1.1695	NA
JG_BH-7_86	576.384	4752.04	0.900532	20.6764	25.3915	0.0138482	26.1236	0.00207668	6.14142	0.23509		13.3732	0.820455	13.9648	3.62315	117.115	607.21	13.3732	0.820455	NA
JG_BH-7_55	121.592	47.5075	1.8107	7.77884	45.1464	0.0370154	46.9883	0.00208832	13.027	0.277238		13.4481	1.75005	36.9059	17.0317	2078.27	843.609	13.4481	1.75005	NA
JG_BH-7_33	968.02	8869.95	1.01778	26.9342	27.0612	0.0107792	27.7998	0.00210566	6.36562	0.228981		13.5597	0.862253	10.8865	3.01026	-547.253	738.476	13.5597	0.862253	NA
JG_BH-7_63	238.625	1885.24	1.47248	13.402	28.907	0.0217411	34.8064	0.00211325	19.3874	0.557006		13.6085	2.63556	21.839	7.52036	1058.18	594.092	13.6085	2.63556	NA
JG_BH-7_45	1280.49	10321.1	0.680238	22.7716	17.9599	0.0128295	18.0934	0.00211886	2.19368	0.121242		13.6446	0.299003	12.944	2.32715	-115.474	445.622	13.6446	0.299003	NA
JG_BH-7_125	425.038	1915.75	1.4922	28.0044	53.2349	0.0105737	53.6709	0.00214759	6.82713	0.127204		13.8294	0.943138	10.68	5.70206	-653.181	1559.78	13.8294	0.943138	NA
JG_BH-7_37	190.961	1555.92	1.72864	7.99337	166.021	0.0371721	167.102	0.00215499	18.9765	0.113562		13.877	2.63054	37.0593	60.8833	2030.25	25.3296	13.877	2.63054	NA
JG_BH-7_39	140.151	1258.7	1.12921	28.915	69.3538	0.0103747	76.6519	0.0021757	32.6429	0.425859		14.0102	4.56838	10.4801	7.99202	-741.993	2195.43	14.0102	4.56838	NA
JG_BH-7_117	294.604	721.644	0.863253	18.9697	38.1743	0.0158674	38.5828	0.00218306	5.59992	0.14514		14.0576	0.786357	15.985	6.11926	316.555	898.103	14.0576	0.786357	NA
JG_BH-7_106	144.893	1214.32	1.27358	8.23985	193.663	0.0372939	194.682	0.00222872	19.8921	0.102177		14.3513	2.85159	37.1786	71.1873	1976.32	133.69	14.3513	2.85159	NA
JG_BH-7_64	846.689	6787.05	0.949241	24.3035	39.2703	0.0127772	39.4303	0.00225219	3.548	0.0899816		14.5022	0.51396	12.8916	5.0511	-278.506	1033.58	14.5022	0.51396	NA
JG_BH-7_88	334.587	728.158	0.893276	21.1368	36.9517	0.0148267	38.1862	0.00227291	9.63083	0.252207		14.6355	1.40792	14.9442	5.66491	64.926	907.34	14.6355	1.40792	NA
JG_BH-7_23	365.654	3195.38	0.978085	18.2514	36.7391	0.0171771	37.4076	0.00227375	7.04053	0.188211		14.6409	1.02963	17.2932	6.41428	403.66	849.141	14.6409	1.02963	NA
JG_BH-7_12	200.122	1105.34	0.939855	11.638	138.294	0.027276	138.768	0.00230228	11.4604	0.0825869		14.8244	1.69698	27.3246	37.4291	1336.49	313.223	14.8244	1.69698	NA
JG_BH-7_30	263.764	3918.36	1.5266	17.4426	122.314	0.018349	122.54	0.00232126	7.43738	0.0606937		14.9465	1.11034	18.4624	22.423	504.303	825.259	14.9465	1.11034	NA
JG_BH-7_15	118.332	1713.59	0.885869	10.93	154.79	0.0476295	155.057	0.0037757	9.09481	0.0586547		24.2939	2.20532	47.2458	71.6985	1456.82	318.938	24.2939	2.20532	NA
JG_BH-7_127	693.209	1162.88	0.856564	18.6753	15.4838	0.0280529	15.6997	0.00379964	2.59478	0.165276		24.4477	0.633162	28.0922	4.34996	352.033	351.734	24.4477	0.633162	NA
JG_BH-7_85	595.706	6854.38	1.31708	24.7537	20.7535	0.0213793	21.1494	0.00383824	4.07263	0.192565		24.6955	1.00383	21.4794	4.49507	-325.431	537.88	24.6955	1.00383	NA
JG_BH-7_34	878.087	3294.95	1.74457	21.4419	7.81548	0.0250959	7.98321	0.00390269	1.62786	0.20391		25.1094	0.40795	25.1674	1.98448	30.7295	187.534	25.1094	0.40795	NA
JG_BH-7_48	472.571	4985.42	1.75659	30.333	31.3043	0.018058	31.3861	0.00397268	2.26456	0.0721517		25.5588	0.577649	18.1722	5.65288	-878.114	921.233	25.5588	0.577649	NA
JG_BH-7_536	303.301	3843.5	1.18228	18.0221	22.0904	0.0310511	22.7825	0.00405864	5.57284	0.244611		26.1108	1.45217	31.0492	6.96682	431.897	497.662	26.1108	1.45217	NA
JG_BH-7_52	259.071	9804.54	1.42217	24.1603	32.2035	0.0234686	32.3918	0.00411234	3.48747	0.107665		26.4555	0.920737	23.5543	7.542	-263.488	835.355	26.4555	0.920737	NA
JG_BH-7_120	194.047	807.111	1.0917	17.7031	30.1743	0.0326786	30.8161	0.00419578	6.25636	0.203022		26.9911	1.68513	32.6506	9.90192	471.546	681.967	26.9911	1.68513	NA
JG_BH-7_103	325.867	2475.37	1.1724	21.7025	26.7409	0.028949	27.2262	0.00455662	5.11757	0.187965		29.3071	1.49641	28.9769	7.77795	1.68129	654.4	29.3071	1.49641	NA
JG_BH-7_130	166.901	6435.6	1.36926	19.3177	48.3565	0.0344221	48.5675	0.00482272	4.52216	0.0931108		31.0145	1.39916	34.3635	16.4117	275.065	1172.81	31.0145	1.39916	NA
JG_BH-7_71	393.573	4200.19	2.22638	19.9876	20.0815	0.0367245	20.2682	0.00532372	2.74507	0.135437		34.2279	0.937088	36.6211	7.29031	196.461	470.759	34.2279	0.937088	NA
JG_BH-7_5	269.13	5601.24	1.15803	14.2174	13.0593	0.0777417	13.4991	0.00801628	3.4178	0.253188		51.4702	1.75215	76.0195	9.88752	938.169	268.844	51.4702	1.75215	NA
JG_BH-7_1	619.934	12962.4	1.12253	21.2965	5.64059	0.0602677	5.98328	0.00930876	1.99585	0.333572		59.7306	1.18663	59.4216	3.45335	46.9784	134.826	59.7306	1.18663	NA
JG_BH-7_96	1005.18	35980.7	1.71135	21.0764	2.68281	0.0887912	2.74934	0.0135726	0.601167	0.218659		86.9064	0.518947	86.3767	2.27659	71.7815	63.8299	86.9064	0.518947	NA
JG_BH-7_98	796.552	56501.3	1.61718	21.2662	4.34943	0.0900532	4.45194	0.0138895	0.949885	0.213364		88.9216	0.838854	87.5529	3.7345	50.3936	103.884	88.9216	0.838854	NA
JG_BH-7_51	666.48	37897.6	1.98144	21.1361	4.28148	0.0909164	4.49998	0.0139369	1.38517	0.307817		89.2226	1.22737	88.3567	3.80797	65.0274	101.959	89.2226	1.22737	NA
JG_BH-7_10	478.298	34955.3	1.30909	22.1318	6.03082	0.0878297	6.10701	0.014098	0.961644	0.157466		90.2467	0.861806	85.4796	5.00659	-45.7083	146.753	90.2467	0.861806	NA
JG_BH-7_99	405.945	3575.52	1.61726	19.6204	9.54012	0.0999263	9.59249	0.0142196	1.00107	0.10436		91.0198	0.904767	96.7083	8.84889	239.372	220.4	91.0198	0.904767	NA
JG_BH-7_4	146.3	6204.41	2.2374	21.5484	33.7492	0.0912636	33.8676	0.014263	2.82874	0.0835235		91.2957	2.56431	88.6798	28.7672	18.8508	831.301	91.2957	2.56431	NA
JG_BH-7_92	784.021	36712.8	1.39787	20.6549	2.70114	0.0954114	3.33883	0.014293	1.96256	0.587797		91.4863	1.78279	92.5319	2.9529	119.59	63.6684	91.4863	1.78279	NA
JG_BH-7_126	240.128	11963.8	1.80709	21.4934	10.3986	0.0917495	10.5364	0.0143024	1.69849	0.161202		91.5458	1.54391	89.1318	8.99113	24.9831	250.037	91.5458	1.54391	NA
JG_BH-7_110	325.333	10330	1.17316	19.1547	5.82327	0.104082	6.15038	0.0144595	1.97907	0.32178		92.5442	1.81843	100.538	5.88726	294.457	133.038	92.5442	1.81843	NA
JG_BH-7_60	737.096	24676.7	1.51249	21.106	3.26439	0.0955962	3.34663	0.0146334	0.737342	0.220324		93.6495	0.685526	92.7031	2.96503	68.4179	77.6936	93.6495	0.685526	NA
JG_BH-7_78	729.15	34894.8	1.29598	20.2197	3.14621	0.0999838	3.24269	0.0146623	0.785116	0.242119		93.833	0.731362	96.7614	2.99281	169.522	73.4847	93.833	0.731362	NA
JG_BH-7_58	219.985	14887.8	1.33066	22.7994	11.8919	0.0897048	12.0429	0.0148333	1.90142	0.157887		94.9193	1.79159	87.2283	10.0666	-118.479	294.086	94.9193	1.79159	NA
JG_BH-7_102	284.889	6734.39	0.992681	19.5466	10.6539	0.104919	10.7674	0.0148739	1.55992	0.144874		95.1772	1.47378	101.307	10.382	248.038	245.864	95.1772	1.47378	NA
JG_BH-7_100	313.669	1468.19	1.3119	20.0421	6.11273	0.102432	7.72808	0.0148894	4.72839	0.611846		95.2758	4.47189	99.0186	7.29108	190.119	142.335	95.2758	4.47189	NA
JG_BH-7_101	567.961	19723.1	0.884508	21.5958	5.27814	0.0958199	5.41274	0.015008	1.19959	0.221623		96.029	1.14342	92.9104	4.80581	13.5729	126.973	96.029	1.14342	NA
JG_BH-7_49	217.406	9041.25	1.86652	21.0572	8.8537	0.100053	9.18362	0.0152802	2.43945	0.265631		97.7575	2.36676	96.8252	8.48145	73.9443	210.805	97.7575	2.36676	NA
JG_BH-7_122	115.095	1649.02	1.24053	22.2128	29.4146	0.09515	29.7948	0.0153289	4.74469	0.159245		98.0665	4.61774	92.2895	26.2908	-54.5934	730.003	98.0665	4.61774	NA
JG_BH-7_72	558.638	56577.7	1.73096	20.7984	4.07994	0.102098	4.25361	0.0154009	1.20304	0.282829		98.5236	1.17627	98.7111	4.00117	103.23	96.5076	98.5236	1.17627	NA
JG_BH-7_41	228.701	14958.4	0.884155	20.5698	9.10131	0.103412	9.85381	0.0154277	3.77673	0.383276		98.6939	3.69901	99.9213	9.37737	129.327	214.501	98.6939	3.69901	NA
JG_BH-7_28	609.587	31028.1	1.61038	20.6173	4.75259	0.103643	4.84098	0.0154977	0.920842	0.190218		99.1387	0.905927	100.133	4.61611	123.854	111.966	99.1387	0.905927	NA
JG_BH-7_74	293.66	19200	1.53419	21.9232	6.89251	0.0981909	6.94897	0.0156125	0.883992	0.127212		99.8673	0.876016	95.1051	6.30884	-22.7287	167.015	99.8673	0.876016	NA
JG_BH-7_115	202.331	11554	1.39147	19.1519	11.9849	0.112401	12.1583	0.0156128	2.0462	0.168296		99.8692	2.02778	108.159	12.4748	294.773	274.436	99.8692	2.02778	NA
JG_BH-7_25	546.292	21475.4	1.06937	21.3003	5.01517	0.101463	5.07145	0.0156744	0.753453	0.148568		100.26	0.749569	98.1258	4.74354	46.5877	119.868	100.26	0.749569	NA
JG_BH-7_2	454.369	31979.4	1.36171	20.8752	7.03595	0.10372	7.18859	0.0157033	1.47348	0.204974		100.443	1.46854	100.204	6.85936	94.5319	166.773	100.443	1.46854	NA
JG_BH-7_26	211.52	8383.31	1.84601	21.8564	8.13336	0.0992292	8.34482	0.0157296	1.8667	0.223695		100.61	1.86351	96.0646	7.64904	-15.3468	196.873	100.61	1.86351	NA
JG_BH-7_104	595.273	36607.5	1.5927	20.6725	2.07901	0.105726	2.37412	0.0158516	1.14637	0.482859		101.385	1.15315	102.048	2.30498	117.598	49.0228	101.385	1.15315	NA
JG_BH-7_20	650.586	28772.4	1.0579	20.2884	2.60072	0.108028	2.84785	0.0158958	1.1604	0.407466		101.665	1.17047	104.16	2.81926	161.62	60.8299	101.665	1.17047	NA
JG_BH-7_87	305.568	26829.9	1.66497	20.4524	9.28156	0.107419	9.33641	0.015934	1.01055	0.108238		101.907	1.02173	103.602	9.19583	142.725	218.199	101.907	1.02173	NA
JG_BH-7_79	387.745	31216.5	2.01422	20.5027	7.64916	0.107666	7.75599	0.0160099	1.28283	0.165399		102.389	1.3031	103.828	7.65499	137.004	179.926	102.389	1.3031	NA
JG_BH-7_65	343.871	11748.9	1.75483	18.3602	23.9418	0.120432	24.0832	0.0160368	2.60593	0.108205		102.559	2.65147	115.463	26.2904	390.333	544.336	102.559	2.65147	NA
JG_BH-7_6	405.761	43404.5	1.46137	21.2348	3.79298	0.1047	4.23054	0.0161248	1.87369	0.442897		103.118	1.91674	101.106	4.07128	53.9092	90.505	103.118	1.91674	NA
JG_BH-7_113	146.691	9915.11	1.89041	22.6053	20.5546	0.098603	20.7577	0.0161659	2.89668	0.139547		103.379	2.97066	95.486	18.9195	-97.4369	509.296	103.379	2.97066	NA
JG_BH-7_80	674.548	11615.6	2.19057	20.7459	2.67919	0.107942	2.75085	0.0162413	0.623807	0.226769		103.857	0.642678	104.081	2.72127	109.199	63.2551	103.857	0.642678	NA
JG_BH-7_32	473.653	24337.5	1.33265	21.2263	5.26849	0.10555	5.40954	0.0162492	1.22724	0.226867		103.907	1.26497	101.887	5.24415	54.8576	125.733	103.907	1.26497	NA
JG_BH-7_24	277.033	19721.7	1.19986	20.771	9.85283	0.108613	9.98446	0.0163621	1.61588	0.161839		104.623	1.67694	104.696	9.9328	106.337	233.262	104.623	1.67694	NA
JG_BH-7_70	115.551	4304.84	1.90549	23.7259	23.6503	0.0953294	24.1573	0.0164039	4.92321	0.203798		104.889	5.12211	92.4558	21.3513	-217.656	601.625	104.889	5.12211	NA
JG_BH-7_16	537.093	35250.2	1.17112	20.8739	4.13192	0.109029	4.24526	0.0165062	0.974431	0.229534		105.537	1.02001	105.077	4.23777	94.6654	97.8729	105.537	1.02001	NA
JG_BH-7_77	256.941	20317	2.2891	22.2231	10.5634	0.102459	10.9839	0.016514	3.00996	0.274033		105.587	3.15224	99.0435	10.3655	-55.7319	257.933	105.587	3.15224	NA
JG_BH-7_35	323.002	20762.3	1.71933	20.7723	3.06875	0.110218	3.24658	0.016605	1.05975	0.32642		106.163	1.11585	106.165	3.27268	106.182	72.504	106.163	1.11585	NA
JG_BH-7_9	129.002	12407	1.49535	18.5342	9.13965	0.123602	9.66785	0.0166149	3.15184	0.326013		106.227	3.32066	118.332	10.7991	369.122	206.277	106.227	3.32066	NA
JG_BH-7_38	416.981	17211.8	1.20361	20.1081	6.08063	0.11463	6.20569	0.0167173	1.23953	0.19974		106.876	1.31383	110.192	6.48025	182.424	141.774	106.876	1.31383	NA
JG_BH-7_59	197.951	18421	1.56412	20.6299	15.4348	0.113965	15.6639	0.0170517	2.66929	0.17041		108.996	2.88496	109.586	16.2731	122.433	365.433	108.996	2.88496	NA
JG_BH-7_68	121.069	3697.74	1.71519	21.3696	14.9772	0.111525	16.5975	0.0172849	7.15252	0.43094		110.473	7.83431	107.359	16.9108	38.7819	360.063	110.473	7.83431	NA
JG_BH-7_29	416.276	19603.1	1.12979	21.0922	4.14175	0.114653	4.23485	0.017539	0.883089	0.208529		112.084	0.981243	110.213	4.42298	69.9724	98.5369	112.084	0.981243	NA
JG_BH-7_129	316.23	18608.4	0.769116	22.47	6.02338	0.108901	6.07641	0.0177474	0.801053	0.13183		113.403	0.900478	104.96	6.05929	-82.7126	147.596	113.403	0.900478	NA
JG_BH-7_111	229.165	24075	1.03933	20.0197	7.90461	0.122865	7.94493	0.0178395	0.799427	0.100621		113.987	0.903235	117.666	8.82736	192.728	184.035	113.987	0.903235	NA
JG_BH-7_123	144.847	2649.39	0.778141	20.2853	16.8017	0.121332	17.0203	0.0178507	2.71946	0.159777		114.058	3.07449	116.279	18.702	161.961	395.292	114.058	3.07449	NA
JG_BH-7_91	327.759	21092.4	1.93685	20.8272	4.00052	0.119389	4.25407	0.0180341	1.4467	0.340074		115.22	1.65207	114.518	4.60704	99.9888	94.68	115.22	1.65207	NA
JG_BH-7_82	159.985	5626.72	1.49929	21.1685	13.698	0.118025	14.067	0.0181202	3.20098	0.227552		115.764	3.67253	113.28	15.0795	61.3581	327.657	115.764	3.67253	NA
JG_BH-7_11	109.48	8975.27	1.91851	21.9004	26.2134	0.114667	26.3255	0.0182133	2.42742	0.0922079		116.354	2.79906	110.225	27.5046	-20.2118	643.748	116.354	2.79906	NA
JG_BH-7_14	123.749	12510.8	1.0066	21.7184	23.9794	0.117561	24.0558	0.0185177	1.91552	0.079628		118.281	2.24504	112.858	25.7	-0.0544418	585.182	118.281	2.24504	NA
JG_BH-7_114	311.84	2574.94	1.23095	16.0778	19.6148	0.161895	19.989	0.0188781	3.84983	0.192597		120.561	4.59828	152.36	28.2879	680.891	422.758	120.561	4.59828	NA
JG_BH-7_116	121.408	4277.37	1.54954	20.9439	11.7146	0.125	13.6431	0.0189874	6.99301	0.512566		121.253	8.40001	119.595	15.3934	86.7509	278.586	121.253	8.40001	NA
JG_BH-7_90	44.3304	4638.92	2.06498	19.5742	40.7443	0.158821	41.2291	0.0225471	6.30445	0.152912		143.733	8.96133	149.67	57.4364	244.786	975.691	143.733	8.96133	NA
JG_BH-7_83	49.2956	3311.67	1.71588	26.0134	31.4079	0.119785	31.6657	0.0225994	4.03283	0.127356		144.063	5.74539	114.877	34.4074	-454.632	845.544	144.063	5.74539	NA
JG_BH-7_93	443.692	2266.41	0.921986	19.8959	4.24262	0.15665	4.62216	0.0226043	1.83427	0.396843		144.094	2.61376	147.766	6.35636	207.112	98.436	144.094	2.61376	NA
JG_BH-7_18	22.8771	1727.82	0.718002	14.1868	107.551	0.220122	107.843	0.022649	7.92584	0.0734943		144.376	11.3158	202.012	200.103	942.618	396.579	144.376	11.3158	NA
JG_BH-7_57	54.3314	5089.62	1.98982	25.7343	36.9065	0.121711	37.1123	0.0227165	3.90313	0.105171		144.802	5.58879	116.622	40.9104	-426.258	996.173	144.802	5.58879	NA
JG_BH-7_112	871.62	126960	1.58857	20.1651	2.45094	0.156544	3.28504	0.0228947	2.18731	0.665842		145.925	3.15598	147.673	4.51489	175.828	57.1993	145.925	3.15598	NA
JG_BH-7_21	57.5381	16597.3	1.70278	19.1565	23.7059	0.16497	24.3177	0.0229203	5.42019	0.222891		146.086	7.82908	155.044	34.9795	294.251	548.002	146.086	7.82908	NA
JG_BH-7_124	54.6392	19303.5	1.52902	26.4143	48.7081	0.119871	48.8676	0.0229642	3.94456	0.0807193		146.363	5.70832	114.955	53.161	-495.134	1365.69	146.363	5.70832	NA
JG_BH-7_109	245.607	73438.1	1.89694	20.7694	7.08694	0.157269	7.22815	0.0236901	1.4218	0.196703		150.935	2.12107	148.31	9.97425	106.507	167.616	150.935	2.12107	NA
JG_BH-7_95	309.754	22841.1	1.71557	20.5544	5.71795	0.161595	5.92584	0.0240897	1.55586	0.262555		153.451	2.35929	152.098	8.37072	131.087	134.551	153.451	2.35929	NA
JG_BH-7_31	180.78	10099.2	1.41225	19.4597	6.99522	0.173777	8.44505	0.0245259	4.73136	0.560253		156.197	7.30141	162.691	12.6958	258.304	160.907	156.197	7.30141	NA
JG_BH-7_66	200.343	5698.22	1.70703	21.0392	4.95074	0.161865	5.01246	0.024699	0.784211	0.156452		157.286	1.21853	152.334	7.09064	75.9371	117.697	157.286	1.21853	NA
JG_BH-7_42	186.36	26439.8	1.40432	21.2931	13.1613	0.160529	13.2308	0.0247908	1.3544	0.102367		157.863	2.11212	151.166	18.585	47.3784	315.55	157.863	2.11212	NA
JG_BH-7_43	126.637	10514.7	1.31009	20.9082	8.15592	0.163747	8.67999	0.0248307	2.9704	0.342212		158.114	4.63949	153.978	12.4018	90.7629	193.523	158.114	4.63949	NA
JG_BH-7_13	63.8387	4324.92	1.71798	21.344	16.0978	0.162694	17.3584	0.0251852	6.49432	0.37413		160.344	10.2848	153.059	24.6679	41.6755	387.085	160.344	10.2848	NA
JG_BH-7_3	163.082	22611.6	1.48058	20.6372	8.51685	0.168709	8.65364	0.0252516	1.53254	0.177098		160.761	2.43326	158.298	12.6848	121.603	200.968	160.761	2.43326	NA
JG_BH-7_47	224.887	30301.6	1.37609	20.5613	6.34564	0.17039	6.53981	0.0254094	1.58176	0.241867		161.753	2.52671	159.758	9.66768	130.293	149.391	161.753	2.52671	NA
JG_BH-7_8	261.194	17109.6	1.46355	21.3277	7.11552	0.164306	7.21301	0.0254153	1.18195	0.163863		161.79	1.88848	154.465	10.3359	43.4874	170.278	161.79	1.88848	NA
JG_BH-7_89	151.691	18980.9	1.71141	22.9282	6.01976	0.155445	6.14648	0.0258492	1.24168	0.202015		164.517	2.01694	146.709	8.39644	-132.393	148.957	164.517	2.01694	NA
JG_BH-7_81	333.556	47442.7	1.22195	20.0803	4.73616	0.17753	4.79729	0.0258547	0.763412	0.159134		164.552	1.24031	165.933	7.344	185.652	110.328	164.552	1.24031	NA
JG_BH-7_27	267.452	18668.1	1.72532	19.7915	5.35078	0.180998	5.65029	0.0259808	1.8152	0.321258		165.344	2.96317	168.919	8.79299	219.301	123.915	165.344	2.96317	NA
JG_BH-7_17	26.6288	2193.45	2.62894	32.3111	140.588	0.111407	140.717	0.0261073	6.02414	0.0428103		166.139	9.8806	107.252	144.185	-1064.2	0	166.139	9.8806	NA
JG_BH-7_105	197.98	39172.5	2.19138	20.1715	8.62852	0.186989	8.67976	0.0273561	0.941698	0.108494		173.98	1.61645	174.057	13.8846	175.082	201.591	173.98	1.61645	NA
JG_BH-7_118	100.913	12836.9	2.06192	23.4141	12.7652	0.164688	12.8352	0.0279665	1.33841	0.104277		177.808	2.34729	154.798	18.4303	-184.5	319.941	177.808	2.34729	NA
JG_BH-7_44	811.177	15520.8	1.71906	19.5134	1.0082	0.244811	1.92031	0.0346468	1.63436	0.85109		219.566	3.52807	222.353	3.8347	251.969	23.1766	219.566	3.52807	NA
JG_BH-7_54	548.373	16481.9	0.693701	17.8751	1.11876	0.384124	1.59819	0.0497987	1.14131	0.714125		313.285	3.49005	330.068	4.50357	450.118	24.8543	313.285	3.49005	NA
JG_BH-7_36	112.79	32943.2	0.622036	16.2177	3.31172	0.849864	3.41985	0.0999627	0.853129	0.249464		614.19	4.99796	624.575	15.9545	662.352	70.9878	614.19	4.99796	92.7287
JG_BH-7_67	427.279	275950	2.44859	14.9284	0.402503	1.29012	0.849122	0.139683	0.747663	0.880513		842.869	5.90722	841.352	4.85709	837.356	8.36624	842.869	5.90722	100.658
JG_BH-7_69	154.665	89747	0.723145	11.821	0.491366	2.65241	0.953825	0.227401	0.817522	0.857098		1320.86	9.7639	1315.31	7.03342	1306.27	9.54013	1306.27	9.54013	101.117
JG_BH-7_46	349.629	190650	1.68657	11.0195	0.287091	2.9693	2.14318	0.23731	2.12387	0.990987		1372.7	26.2594	1399.8	16.2805	1441.3	5.4712	1441.3	5.4712	95.24
JG_BH-7_108	26.1656	24733.6	0.941612	10.3825	2.53197	3.64284	2.71446	0.27431	0.978485	0.360471		1562.64	13.5781	1558.94	21.629	1553.92	47.5378	1553.92	47.5378	100.561
JG_BH-7_75	321.604	259972	1.49006	9.81259	0.274199	4.12141	0.931029	0.293311	0.889736	0.955648		1658.05	13.0078	1658.56	7.60777	1659.18	5.07616	1659.18	5.07616	99.932
JG_BH-7_128	99.689	168649	1.03172	8.12585	0.460738	6.22798	0.982947	0.367041	0.868278	0.883341		2015.46	15.0283	2008.39	8.60005	2001.1	8.18235	2001.1	8.18235	100.718
JG_BH-7_22	75.5759	157464	2.51095	5.96295	0.419225	10.9276	0.889191	0.472589	0.784162	0.881883		2494.9	16.2229	2516.98	8.27192	2534.83	7.03345	2534.83	7.03345	98.4251
JG-BH8
JG-BH8_7	226.796	2781.2	1.76801	14.8806	69.4063	0.0171394	85.8207	0.00184976	50.4773	0.588172		11.9133	6.00796	17.2556	14.6848	844.052	1675.31	11.9133	6.00796	NA
JG-BH8_93	104.901	1468.49	1.32484	7.45052	153.659	0.0353889	159.506	0.00191228	42.7913	0.268274		12.3156	5.26497	35.312	55.4116	2153.87	162.535	12.3156	5.26497	NA
JG-BH8_99	220.333	2075.73	1.36175	11.6197	80.6826	0.0239937	82.2069	0.00202204	15.7571	0.191676		13.0218	2.04977	24.0751	19.5611	1339.54	1994.67	13.0218	2.04977	NA
JG-BH8_58	823.629	11697.8	1.97605	21.5233	24.0934	0.0129741	24.693	0.00202528	5.4089	0.219046		13.0426	0.704748	13.089	3.21133	21.6273	585.66	13.0426	0.704748	NA
JG-BH8_74	79.828	498.303	1.25585	0.301946	1844.41	0.947923	1844.81	0.00207588	38.3986	0.0208144		13.3681	5.12784	677.02	#NUM!	NA	NA	13.3681	5.12784	NA
JG-BH8_10	249.691	1411.12	0.916889	12.7069	204.979	0.0227277	205.796	0.00209456	18.3168	0.0890046		13.4883	2.46804	22.819	46.4692	1164.52	824.195	13.4883	2.46804	NA
JG-BH8_17	380.093	2865.88	0.594218	18.1562	24.1956	0.0159191	25.9283	0.00209625	9.31948	0.359432		13.4992	1.25673	16.0367	4.12541	415.353	547.867	13.4992	1.25673	NA
JG-BH8_27	139.536	1888.34	0.888086	10.4945	145.399	0.0282307	148.373	0.00214872	29.5577	0.199213		13.8367	4.08542	28.2678	41.3862	1533.76	214.095	13.8367	4.08542	NA
JG-BH8_16	460.227	2111.26	0.77093	14.591	37.6077	0.0208116	37.8753	0.00220238	4.49438	0.118662		14.1818	0.636683	20.9149	7.84071	884.764	805.48	14.1818	0.636683	NA
JG-BH8_85	170.939	1283.24	1.54145	12.0333	32.8589	0.0261981	37.0822	0.00228641	17.1866	0.463474		14.7223	2.52739	26.2586	9.61272	1271.64	659.184	14.7223	2.52739	NA
JG-BH8_28	167.145	1834.5	2.28255	27.7452	130.646	0.0120335	131.868	0.00242148	17.9046	0.135777		15.591	2.78813	12.1457	15.9222	-627.688	0	15.591	2.78813	NA
JG-BH8_55	236.384	1346.09	2.01863	7.32526	118.254	0.0689259	118.728	0.00366188	10.599	0.0892713		23.5629	2.49286	67.6796	77.8874	2183.42	346.444	23.5629	2.49286	NA
JG-BH8_13	2524.12	86632.3	1.56499	20.8141	5.44448	0.0250753	5.47695	0.00378531	0.595502	0.108729		24.3556	0.144764	25.147	1.36037	101.435	128.812	24.3556	0.144764	NA
JG-BH8_103	364.792	3008.8	1.10544	21.9698	17.5679	0.0239442	17.8744	0.00381526	3.29612	0.184404		24.5479	0.807591	24.026	4.24413	-27.8718	428.484	24.5479	0.807591	NA
JG-BH8_49	173.696	1776.62	1.63833	8.02472	349.66	0.0683274	349.721	0.00397671	6.55367	0.0187397		25.5847	1.67341	67.111	231.019	2023.32	704.768	25.5847	1.67341	NA
JG-BH8_106	112.372	209.429	1.61969	20.0739	53.8211	0.028796	55.531	0.0041924	13.6739	0.246239		26.9694	3.68007	28.8259	15.7835	186.388	1346.81	26.9694	3.68007	NA
JG-BH8_60	183.53	2127.91	0.938728	36.5972	116.135	0.015913	116.67	0.00422375	11.17	0.0957399		27.1707	3.02858	16.0306	18.5581	-1455.75	0	27.1707	3.02858	NA
JG-BH8_36	292.39	4739	2.15663	26.0043	44.3638	0.029326	45.3594	0.0055309	9.45154	0.20837		35.5563	3.35136	29.3488	13.1226	-453.704	1221.3	35.5563	3.35136	NA
JG-BH8_18	849.943	19279.2	1.1038	20.9881	6.99266	0.0368397	7.2632	0.00560773	1.96388	0.270387		36.0488	0.705977	36.7339	2.62038	81.713	166.125	36.0488	0.705977	NA
JG-BH8_118	143.37	2457.45	1.76213	23.5212	54.5466	0.0384198	54.737	0.00655409	4.56143	0.0833335		42.1125	1.91467	38.2801	20.5661	-195.913	1466.17	42.1125	1.91467	NA
JG-BH8_47	316.877	6387.29	0.811791	22.3161	26.7582	0.041344	27.1249	0.00669159	4.44478	0.163864		42.9931	1.90459	41.1354	10.9353	-65.9081	663.286	42.9931	1.90459	NA
JG-BH8_116	279.365	2546.45	2.05505	20.9312	13.0044	0.0509885	13.4241	0.00774044	3.33067	0.248111		49.706	1.64917	50.4961	6.61296	88.1887	309.389	49.706	1.64917	NA
JG-BH8_72	160.14	6808.8	0.969784	47.4459	65.2522	0.0230315	65.4142	0.00792537	4.59979	0.0703179		50.8888	2.33156	23.1205	14.9543	NA	NA	50.8888	2.33156	NA
JG-BH8_70	227.479	4575.18	1.97275	21.3309	8.54237	0.0745714	8.82889	0.0115367	2.23095	0.252688		73.9445	1.64024	73.0283	6.22126	43.1293	204.548	73.9445	1.64024	NA
JG-BH8_92	334.643	18848.5	1.97938	22.511	6.87137	0.0778693	7.12556	0.0127134	1.88625	0.264716		81.439	1.52648	76.1397	5.22701	-87.1858	168.562	81.439	1.52648	NA
JG-BH8_15	113.481	11641.8	2.46184	25.1867	68.4161	0.0747318	68.5459	0.0136514	4.21719	0.0615236		87.4071	3.66125	73.1798	48.4336	-370.188	2005.28	87.4071	3.66125	NA
JG-BH8_117	942.402	42061.6	1.54923	20.9631	2.91313	0.0907688	3.07307	0.0138004	0.978475	0.318403		88.3548	0.858632	88.2193	2.59661	84.5324	69.1048	88.3548	0.858632	NA
JG-BH8_37	426.591	336.455	0.941699	16.354	13.36	0.118791	13.9262	0.0140899	3.9306	0.282245		90.1955	3.52054	113.976	15.0152	644.431	288.308	90.1955	3.52054	NA
JG-BH8_57	377.012	16921.7	2.20154	16.378	20.3066	0.119042	20.5105	0.0141403	2.88513	0.140666		90.5158	2.59325	114.203	22.1579	641.285	440.819	90.5158	2.59325	NA
JG-BH8_52	371.264	21371.4	1.81362	20.2002	8.99769	0.097279	9.0511	0.0142519	0.981767	0.108469		91.2252	0.889312	94.2615	8.14784	171.77	210.374	91.2252	0.889312	NA
JG-BH8_79	139.143	9009.07	1.81015	25.4166	32.4564	0.0779235	32.6969	0.0143643	3.95845	0.121065		91.9396	3.61355	76.1908	24.0048	-393.799	864.328	91.9396	3.61355	NA
JG-BH8_88	611.463	57471.7	1.49677	20.3908	3.77469	0.0975345	4.0405	0.0144242	1.44131	0.356716		92.3201	1.32114	94.498	3.64592	149.828	88.5154	92.3201	1.32114	NA
JG-BH8_95	133.944	3234.22	1.08221	17.5313	15.315	0.114238	15.5334	0.0145252	2.59521	0.167073		92.9621	2.39525	109.834	16.172	493.116	339.439	92.9621	2.39525	NA
JG-BH8_45	275.933	14263.6	1.77567	20.9396	16.4476	0.0963267	16.5906	0.014629	2.17335	0.130999		93.6212	2.02001	93.3799	14.8023	87.2437	392.25	93.6212	2.02001	NA
JG-BH8_38	145.606	4478.29	1.55251	20.5161	12.786	0.0985872	12.9173	0.0146695	1.83718	0.142226		93.8785	1.71222	95.4714	11.7708	135.457	301.501	93.8785	1.71222	NA
JG-BH8_33	254.55	2236.32	1.94376	20.4601	13.0583	0.0993025	13.5772	0.0147356	3.71793	0.273835		94.2986	3.48043	96.1322	12.4539	141.841	307.604	94.2986	3.48043	NA
JG-BH8_111	339.608	24573	1.76081	20.5897	6.60565	0.0989751	6.87594	0.01478	1.9089	0.27762		94.5808	1.79227	95.8299	6.2879	127.049	155.618	94.5808	1.79227	NA
JG-BH8_104	404.427	18988.2	1.58694	22.4386	7.53932	0.0913281	7.7457	0.0148627	1.77611	0.229303		95.1064	1.6768	88.7398	6.58181	-79.2926	184.705	95.1064	1.6768	NA
JG-BH8_91	167.465	6779.85	1.54177	22.1928	18.5847	0.0924105	18.6771	0.0148742	1.85576	0.0993599		95.1789	1.75332	89.7464	16.044	-52.4083	455.77	95.1789	1.75332	NA
JG-BH8_120	116.331	5346.93	1.24502	22.4626	30.2067	0.0917595	30.4798	0.0149489	4.071	0.133564		95.6538	3.86532	89.1411	26.0173	-81.9084	754.369	95.6538	3.86532	NA
JG-BH8_76	467.962	29392.5	1.51102	18.9577	12.4557	0.109417	12.7962	0.0150443	2.93232	0.229155		96.2594	2.80166	105.432	12.8152	317.99	284.119	96.2594	2.80166	NA
JG-BH8_63	152.89	7869.64	1.43223	20.2381	20.6723	0.102498	20.8254	0.0150447	2.52016	0.121014		96.2621	2.40794	99.0797	19.6615	167.397	487.455	96.2621	2.40794	NA
JG-BH8_19	87.9508	4509.42	1.60096	38.1962	72.2341	0.0549496	72.3442	0.0152224	3.98999	0.0551529		97.3905	3.85667	54.3159	38.28	NA	NA	97.3905	3.85667	NA
JG-BH8_69	461.309	49691.6	1.35897	21.2882	4.28826	0.0985989	4.49261	0.0152234	1.33952	0.298161		97.3966	1.29484	95.4822	4.09415	47.9052	102.451	97.3966	1.29484	NA
JG-BH8_14	188.113	8314.17	1.89428	21.4594	16.0083	0.0987175	16.145	0.0153642	2.09649	0.129854		98.291	2.04503	95.5918	14.7301	28.7417	385.844	98.291	2.04503	NA
JG-BH8_34	216.299	16160.6	1.9394	22.6181	13.8391	0.0946645	13.9217	0.0155289	1.51371	0.10873		99.3365	1.49214	91.8393	12.225	-98.8248	341.319	99.3365	1.49214	NA
JG-BH8_71	182.944	26393.6	1.18935	19.2128	9.92903	0.111915	10.1449	0.0155948	2.08164	0.205191		99.7545	2.06055	107.716	10.3684	287.565	227.44	99.7545	2.06055	NA
JG-BH8_108	260.566	22506.1	1.07006	21.038	8.93736	0.102465	9.11897	0.0156342	1.81085	0.198581		100.005	1.79697	99.0489	8.60588	76.0714	212.716	100.005	1.79697	NA
JG-BH8_86	433.012	21174.6	2.38938	20.4226	6.71749	0.106566	6.92597	0.0157845	1.68654	0.243509		100.959	1.68944	102.82	6.77268	146.198	157.687	100.959	1.68944	NA
JG-BH8_82	278.565	4044.98	0.96514	16.2698	21.9133	0.136386	22.9639	0.0160934	6.86642	0.299009		102.919	7.01073	129.819	27.9917	655.522	475.325	102.919	7.01073	NA
JG-BH8_24	337.086	17200.2	1.96961	21.6693	8.66106	0.103171	8.75076	0.0162144	1.24974	0.142815		103.687	1.28544	99.6991	8.30998	5.35949	208.879	103.687	1.28544	NA
JG-BH8_66	173.377	12806.5	2.04038	20.7044	12.3983	0.108736	12.7383	0.0163281	2.92339	0.229496		104.408	3.02766	104.809	12.6856	113.918	293.461	104.408	3.02766	NA
JG-BH8_114	122.633	9053.91	2.12021	19.9622	11.1754	0.11344	11.6863	0.0164238	3.41771	0.292455		105.014	3.56001	109.107	12.09	199.404	260.239	105.014	3.56001	NA
JG-BH8_59	250.229	13411	0.802394	20.1051	8.43125	0.112947	8.53969	0.0164694	1.35658	0.158856		105.304	1.41693	108.657	8.79997	182.778	196.69	105.304	1.41693	NA
JG-BH8_35	839.895	14464.5	1.03562	20.3806	4.08565	0.111445	4.23404	0.0164732	1.11111	0.262423		105.328	1.1608	107.286	4.31083	150.976	95.7737	105.328	1.1608	NA
JG-BH8_21	487.187	26202.6	0.767125	21.7168	6.20458	0.105246	6.33924	0.0165767	1.29971	0.205026		105.984	1.36623	101.607	6.12941	0.1	149.664	105.984	1.36623	NA
JG-BH8_81	346.734	33944.6	1.40452	21.1291	8.10725	0.108204	8.28114	0.0165816	1.68813	0.203852		106.015	1.77504	104.322	8.21023	65.8087	193.258	106.015	1.77504	NA
JG-BH8_8	460.902	34703.5	1.96319	21.4569	8.00827	0.107946	8.08359	0.0167986	1.10088	0.136187		107.391	1.17245	104.085	7.99707	29.0312	192.212	107.391	1.17245	NA
JG-BH8_75	163.373	15996.1	2.283	21.2924	22.6421	0.109198	22.7641	0.0168631	2.35368	0.103394		107.8	2.51618	105.232	22.7593	47.4357	546.884	107.8	2.51618	NA
JG-BH8_67	45.455	2080.87	1.00625	17.6614	39.7058	0.131741	40.6294	0.016875	8.61415	0.212018		107.876	9.21526	125.661	48.0583	476.787	911.694	107.876	9.21526	NA
JG-BH8_113	112.384	9227.34	1.79242	21.1877	20.1369	0.109978	20.7623	0.0169	5.05763	0.243597		108.034	5.41845	105.945	20.8909	59.2424	484.171	108.034	5.41845	NA
JG-BH8_23	284.634	23292.5	1.68488	20.4341	11.7006	0.115164	11.7513	0.0170676	1.09053	0.092801		109.096	1.17972	110.679	12.323	144.83	275.267	109.096	1.17972	NA
JG-BH8_50	138.382	11039.6	1.0809	24.7809	24.3862	0.095405	24.5209	0.0171469	2.5664	0.104662		109.599	2.78898	92.5259	21.6885	-328.254	634.578	109.599	2.78898	NA
JG-BH8_51	168.722	4466.39	1.52439	19.8462	14.3904	0.119515	14.7706	0.0172027	3.32947	0.225412		109.953	3.6298	114.632	16.0123	212.881	334.886	109.953	3.6298	NA
JG-BH8_105	300.194	22343.1	1.34579	20.7135	6.07468	0.114582	6.28197	0.0172134	1.60045	0.254768		110.021	1.74588	110.148	6.55744	112.89	143.443	110.021	1.74588	NA
JG-BH8_87	151.532	10825.7	1.48272	22.6689	15.0773	0.104917	15.3544	0.0172495	2.90412	0.189139		110.249	3.17455	101.305	14.8051	-104.345	372.542	110.249	3.17455	NA
JG-BH8_43	273.749	5470.13	1.57184	19.6729	11.3365	0.121355	11.5599	0.0173151	2.2614	0.195625		110.665	2.48121	116.3	12.7034	233.213	262.406	110.665	2.48121	NA
JG-BH8_20	196.934	1346.71	1.19169	20.8323	22.6999	0.114646	22.8213	0.0173219	2.35069	0.103004		110.708	2.58018	110.206	23.8381	99.3622	543.054	110.708	2.58018	NA
JG-BH8_9	107.621	3579.49	1.96201	18.8293	23.7024	0.127258	24.1821	0.0173787	4.79265	0.19819		111.068	5.27751	121.631	27.7265	333.459	544.154	111.068	5.27751	NA
JG-BH8_90	403.153	40608.9	1.75002	21.182	4.41838	0.113922	4.77651	0.0175013	1.81464	0.379909		111.845	2.01208	109.546	4.96015	59.8684	105.325	111.845	2.01208	NA
JG-BH8_42	145.964	14812.7	0.921141	20.1476	14.8255	0.120542	14.9689	0.0176141	2.06717	0.138098		112.559	2.3066	115.563	16.3519	177.85	347.327	112.559	2.3066	NA
JG-BH8_25	174.771	11517.2	1.7203	19.972	15.2508	0.121972	15.6665	0.0176677	3.58531	0.228851		112.899	4.01253	116.858	17.2951	198.244	356.063	112.899	4.01253	NA
JG-BH8_64	126.046	7425.8	1.29542	23.6082	19.5805	0.103726	20.9171	0.0177603	7.35729	0.351735		113.485	8.2764	100.21	19.9625	-205.168	495.022	113.485	8.2764	NA
JG-BH8_96	210.969	20802.4	1.35614	20.3117	17.7681	0.120614	17.8603	0.0177681	1.81203	0.101456		113.535	2.03927	115.628	19.5214	158.957	418.588	113.535	2.03927	NA
JG-BH8_22	405.203	903.241	11.3775	18.5765	11.5034	0.132809	12.5701	0.0178933	5.06757	0.403144		114.328	5.74256	126.618	14.9648	363.979	260.156	114.328	5.74256	NA
JG-BH8_115	133.102	10292.7	1.4342	22.7898	20.3199	0.108891	20.5513	0.0179983	3.07579	0.149664		114.993	3.50557	104.951	20.4943	-117.439	505.319	114.993	3.50557	NA
JG-BH8_80	150.27	9798.16	1.7311	21.1982	11.2875	0.117807	11.4684	0.0181122	2.02862	0.176888		115.714	2.32645	113.082	12.2732	58.0082	269.821	115.714	2.32645	NA
JG-BH8_61	520.721	69069.5	11.7527	20.5437	6.2888	0.12194	6.33059	0.0181686	0.726268	0.114723		116.071	0.835444	116.829	6.98646	132.303	147.996	116.071	0.835444	NA
JG-BH8_1	179.747	7853.47	1.49118	22.5017	21.0249	0.112475	21.18	0.0183557	2.55863	0.120804		117.255	2.97301	108.227	21.7464	-86.1687	520.061	117.255	2.97301	NA
JG-BH8_98	350.224	16425.3	1.90076	21.6482	7.58457	0.117263	7.76477	0.0184112	1.66312	0.214187		117.607	1.93821	112.588	8.27511	7.72119	182.774	117.607	1.93821	NA
JG-BH8_100	199.526	7769.47	1.36033	20.2418	13.5017	0.125834	13.6231	0.0184733	1.8147	0.133207		118	2.12186	120.347	15.4619	166.97	316.681	118	2.12186	NA
JG-BH8_44	47.7094	3833.71	1.87798	34.4719	79.7499	0.0750972	79.8828	0.0187754	4.60718	0.0576742		119.911	5.47347	73.525	56.7167	NA	NA	119.911	5.47347	NA
JG-BH8_40	74.3292	7418.02	0.79643	21.3563	25.447	0.123941	25.5631	0.0191972	2.43351	0.0951963		122.581	2.95483	118.638	28.6305	40.3086	617.328	122.581	2.95483	NA
JG-BH8_110	41.7226	5771.62	1.80483	18.8781	46.7285	0.16038	46.9652	0.0219586	4.70931	0.100272		140.023	6.523	151.036	66.0035	327.578	1118.37	140.023	6.523	NA
JG-BH8_31	61.8202	4139.83	1.34634	24.8664	33.3136	0.123239	33.406	0.022226	2.48242	0.0743106		141.709	3.47943	118.005	37.2328	-337.115	878.245	141.709	3.47943	NA
JG-BH8_3	108.104	16239.4	1.79487	21.3816	16.9939	0.149684	17.1525	0.0232121	2.32754	0.135697		147.924	3.40379	141.633	22.6791	37.4352	409.238	147.924	3.40379	NA
JG-BH8_112	203.944	12023.1	2.0547	21.2661	6.95628	0.152974	7.06524	0.0235942	1.23605	0.174948		150.331	1.83667	144.535	9.51849	50.3985	166.246	150.331	1.83667	NA
JG-BH8_30	177.515	14910.5	1.89884	20.5559	8.15114	0.159288	8.23577	0.0237474	1.17766	0.142994		151.296	1.76101	150.079	11.4906	130.875	191.971	151.296	1.76101	NA
JG-BH8_77	96.8498	11365.9	3.49098	22.6541	25.2967	0.145003	25.4408	0.0238244	2.70386	0.106281		151.781	4.05601	137.49	32.7251	-102.732	630.419	151.781	4.05601	NA
JG-BH8_39	78.6999	8491.28	0.720766	20.2223	15.1471	0.169154	15.5539	0.024809	3.53426	0.227226		157.978	5.51548	158.684	22.8535	169.219	355.497	157.978	5.51548	NA
JG-BH8_89	62.0691	5649.6	1.60071	22.4913	28.4539	0.153503	29.1765	0.0250398	6.45286	0.221167		159.429	10.1616	145.001	39.4439	-85.0307	709.356	159.429	10.1616	NA
JG-BH8_101	70.1241	6063.77	3.45404	21.7763	23.55	0.160003	23.7947	0.0252704	3.40366	0.143043		160.879	5.40801	150.706	33.3378	-6.48055	575.141	160.879	5.40801	NA
JG-BH8_2	236.148	21064.6	1.54386	20.8383	8.45875	0.168363	8.57479	0.0254454	1.40594	0.163961		161.979	2.24895	157.998	12.5472	98.7091	200.429	161.979	2.24895	NA
JG-BH8_107	105.669	8185.81	1.49081	23.2823	19.7965	0.15296	20.3093	0.0258288	4.53471	0.223283		164.389	7.36032	144.522	27.3648	-170.428	497.175	164.389	7.36032	NA
JG-BH8_68	445.106	35206.6	2.50965	20.0334	2.71301	0.178478	2.8585	0.0259322	0.90035	0.314972		165.039	1.46707	166.75	4.39577	191.131	63.0927	165.039	1.46707	NA
JG-BH8_62	84.2798	15101	1.30493	22.9764	20.4256	0.157117	20.6993	0.0261821	3.35494	0.16208		166.609	5.51801	148.176	28.5461	-137.583	509.981	166.609	5.51801	NA
JG-BH8_5	181.828	15471.8	1.56689	18.9382	7.52432	0.190745	7.70252	0.0261994	1.64725	0.213859		166.718	2.71105	177.265	12.5291	320.375	171.182	166.718	2.71105	NA
JG-BH8_97	182.743	18198.5	1.09843	20.1226	11.2217	0.181123	11.2997	0.0264336	1.32575	0.117326		168.189	2.20093	169.026	17.5962	180.75	262.202	168.189	2.20093	NA
JG-BH8_26	385.651	25277.7	1.22603	19.8402	4.32923	0.186442	4.37643	0.026828	0.641006	0.146468		170.665	1.07962	173.588	6.98317	213.626	100.334	170.665	1.07962	NA
JG-BH8_11	237.596	26219.4	1.40321	20.4945	8.24517	0.181626	8.37744	0.0269969	1.4828	0.176999		171.725	2.51272	169.459	13.0756	137.937	193.939	171.725	2.51272	NA
JG-BH8_119	85.8183	6700.22	1.41363	21.4405	15.7378	0.1787	16.0512	0.027788	3.1562	0.196633		176.689	5.50093	166.941	24.7141	30.8451	379.105	176.689	5.50093	NA
JG-BH8_4	93.6786	12633	1.90357	21.6605	16.295	0.193086	16.3885	0.0303332	1.74795	0.106657		192.633	3.31731	179.259	26.937	6.34729	394.499	192.633	3.31731	NA
JG-BH8_83	289.943	65425.5	2.34445	19.5894	4.20749	0.252088	4.75032	0.0358156	2.20512	0.464205		226.844	4.9152	228.271	9.71144	242.975	96.9742	226.844	4.9152	NA
JG-BH8_94	60.1306	10202.7	1.2998	19.7566	7.66404	0.464584	7.9998	0.0665697	2.29331	0.286671		415.456	9.22718	387.441	25.7723	223.385	177.424	415.456	9.22718	185.982
JG-BH8_109	32.1323	13594.8	0.808067	18.5372	13.6892	0.672924	13.8328	0.0904709	1.98789	0.143708		558.322	10.6318	522.489	56.5561	368.757	309.689	558.322	10.6318	151.406
JG-BH8_56	290.443	177719	5.06882	17.1084	1.39462	0.730863	1.63903	0.0906867	0.861082	0.52536		559.597	4.61536	557.06	7.02744	546.683	30.4901	559.597	4.61536	102.362
JG-BH8_65	580.153	202916	4.37124	16.91	0.52459	0.74438	0.795917	0.0912931	0.598572	0.752054		563.18	3.22799	564.958	3.44868	572.137	11.4048	563.18	3.22799	98.4345
JG-BH8_29	87.6503	47090.4	1.12165	15.9195	3.12441	0.953302	3.17772	0.110068	0.579631	0.182404		673.141	3.70493	679.821	15.7486	702.024	66.5069	673.141	3.70493	95.8858
JG-BH8_102	208.35	273518	1.72731	11.4173	0.760089	2.91878	1.00054	0.241692	0.650648	0.650298		1395.49	8.16419	1386.79	7.56698	1373.42	14.6212	1373.42	14.6212	101.607
JG-BH8_53	507.236	303317	10.2539	10.5824	0.700204	3.33513	2.41194	0.255974	2.30806	0.956933		1469.21	30.3239	1489.31	18.8433	1518.04	13.2062	1518.04	13.2062	96.7835
JG-BH8_32	112.548	146631	0.940013	9.98715	0.550893	3.97596	5.14946	0.287993	5.11991	0.994261		1631.49	73.8019	1629.3	41.8025	1626.46	10.2433	1626.46	10.2433	100.31
JG-BH8_84	212.603	205894	1.54622	9.36407	0.470754	4.63765	0.620518	0.314964	0.404269	0.651503		1765.09	6.24218	1756.07	5.18308	1745.34	8.62181	1745.34	8.62181	101.131
JG-BH8_48	203.723	254828	2.4231	9.12819	0.505534	4.88303	0.760206	0.323275	0.567758	0.746847		1805.7	8.94137	1799.33	6.40701	1791.94	9.20743	1791.94	9.20743	100.768
JG-BH8_78	802.083	617153	11.4043	6.73327	0.496478	7.77187	3.42563	0.379534	3.38946	0.989442		2074.1	60.1145	2204.96	30.8274	2328.9	8.50589	2328.9	8.50589	89.0594
JG-BH8_73	38.0827	102396	0.608467	5.56223	0.596392	12.2074	1.07207	0.49246	0.89087	0.830981		2581.31	18.9497	2620.48	10.0617	2650.87	9.89119	2650.87	9.89119	97.3761
JG-MDS9
JG-MDS-9-108	103.545	2095.73	0.923111	11.8288	49.5614	0.0388084	53.9538	0.0033294	21.3231	0.39521		21.4271	4.56132	38.66	20.4692	1304.98	1030.41	21.4271	4.56132	NA
JG-MDS-9-19	195.162	1741.43	0.648713	16.0143	41.2017	0.0294442	42.7825	0.00341986	11.5224	0.269324		22.0082	2.53154	29.4655	12.4255	689.344	916.699	22.0082	2.53154	NA
JG-MDS-9-107	240.144	6479.53	1.45961	22.2953	41.6054	0.0217381	42.1117	0.00351507	6.51045	0.154599		22.6199	1.47008	21.836	9.0976	-63.64	1055.68	22.6199	1.47008	NA
JG-MDS-9-113	294.364	7098.84	0.977987	21.1186	21.8736	0.0232772	22.7129	0.0035653	6.11749	0.26934		22.9425	1.40101	23.3644	5.2462	66.9703	526.001	22.9425	1.40101	NA
JG-MDS-9-44	319.723	3750.08	1.74344	24.2971	35.335	0.0202809	36.7408	0.00357388	10.0658	0.273969		22.9977	2.31079	20.3868	7.41571	-277.834	923.585	22.9977	2.31079	NA
JG-MDS-9-97	816.295	11799.6	0.905505	24.0618	12.2554	0.0205106	13.1349	0.00357937	4.72561	0.359775		23.0329	1.0865	20.6155	2.68052	-253.134	311.27	23.0329	1.0865	NA
JG-MDS-9-22	309.85	9456.09	0.94595	27.4713	42.1891	0.018036	42.3545	0.00359351	3.73892	0.0882768		23.1237	0.863028	18.1503	7.61929	-600.639	1191.42	23.1237	0.863028	NA
JG-MDS-9-12	275.692	5573.37	1.53667	18.5149	41.3157	0.0267846	41.7125	0.00359671	5.74022	0.137614		23.1443	1.32615	26.8387	11.0489	371.463	969.015	23.1443	1.32615	NA
JG-MDS-9-60	303.267	2475.75	1.3868	30.9739	48.0943	0.0160245	48.5299	0.00359981	6.48792	0.133689		23.1642	1.50018	16.142	7.77193	-938.861	1477.47	23.1642	1.50018	NA
JG-MDS-9-49	297.768	604.204	1.30724	15.3895	21.7228	0.032264	22.2756	0.00360115	4.93165	0.221392		23.1728	1.14075	32.243	7.06959	773.651	462.195	23.1728	1.14075	NA
JG-MDS-9-110	682.199	44285.9	3.23815	21.424	25.5902	0.0231905	25.6701	0.00360338	2.02395	0.0788446		23.1871	0.468453	23.2784	5.90768	32.7146	621.777	23.1871	0.468453	NA
JG-MDS-9-32	295.303	3764.43	1.4967	20.0602	33.291	0.0247951	33.4313	0.00360745	3.05945	0.0915145		23.2133	0.70892	24.8695	8.21337	187.981	794.441	23.2133	0.70892	NA
JG-MDS-9-9	564.29	15048.4	1.02003	20.7968	21.8029	0.0239224	21.9106	0.00360829	2.17053	0.0990629		23.2187	0.503062	24.0044	5.19789	103.437	520.733	23.2187	0.503062	NA
JG-MDS-9-6	896.503	18584	0.405553	24.3642	18.6004	0.0204743	18.6548	0.00361792	1.42389	0.0763281		23.2805	0.33089	20.5793	3.80041	-284.849	477.351	23.2805	0.33089	NA
JG-MDS-9-147	177.146	3356.25	1.97122	4.22927	629.906	0.118325	630.082	0.00362946	14.926	0.0236889		23.3547	3.4796	113.553	817.093	3096.2	464.508	23.3547	3.4796	NA
JG-MDS-9-81	671.877	13606.6	0.667312	23.1159	10.8558	0.0217077	10.9978	0.00363934	1.76183	0.160198		23.4181	0.41184	21.8058	2.3726	-152.583	270.115	23.4181	0.41184	NA
JG-MDS-9-124	211.021	7217.25	1.87454	20.7563	44.4434	0.0242905	46.9128	0.00365666	15.0197	0.320162		23.5294	3.5276	24.3694	11.2967	108.043	1099.4	23.5294	3.5276	NA
JG-MDS-9-57	95.2036	2176.43	1.35814	4.59183	253.461	0.110209	254.188	0.00367029	19.2076	0.0755645		23.6169	4.52794	106.156	261.865	2964.33	330.352	23.6169	4.52794	NA
JG-MDS-9-1	354.881	14226.3	0.66088	35.3336	48.5944	0.0143372	48.7911	0.00367409	4.3766	0.0897008		23.6413	1.03279	14.4543	7.00258	NA	NA	23.6413	1.03279	NA
JG-MDS-9-150	435.645	3476.86	0.78008	20.1041	23.8934	0.0252553	24.1552	0.00368245	3.54672	0.14683		23.695	0.838853	25.3254	6.04181	182.89	563.612	23.695	0.838853	NA
JG-MDS-9-143	211.51	3770.56	1.25571	12.4822	157.924	0.0407987	158.177	0.00369348	8.94002	0.056519		23.7658	2.12076	40.6035	63.0392	1199.82	526.679	23.7658	2.12076	NA
JG-MDS-9-43	588.062	20604.4	2.58236	22.6042	16.7284	0.0225553	16.9682	0.00369773	2.8424	0.167513		23.7931	0.675049	22.6478	3.8004	-97.3121	413.216	23.7931	0.675049	NA
JG-MDS-9-30	596.56	18819.7	0.982635	21.3531	11.0737	0.0239032	11.5941	0.00370182	3.43458	0.296235		23.8194	0.816588	23.9854	2.74831	40.6745	265.554	23.8194	0.816588	NA
JG-MDS-9-131	345.593	2838.41	0.787913	20.1057	20.6674	0.0254489	22.2264	0.00371096	8.17767	0.367926		23.8781	1.94906	25.5171	5.60092	182.709	485.963	23.8781	1.94906	NA
JG-MDS-9-88	767.207	7498.97	1.17992	22.8291	19.2918	0.0224525	19.3569	0.00371751	1.58595	0.0819323		23.9202	0.37866	22.5457	4.31608	-121.684	479.728	23.9202	0.37866	NA
JG-MDS-9-73	93.5862	2384.22	1.6248	7.29443	220.534	0.0703216	220.911	0.00372031	12.8873	0.058337		23.9381	3.07925	69.0046	148.422	2190.76	90.495	23.9381	3.07925	NA
JG-MDS-9-99	222.242	3188.92	0.901563	22.7979	41.6427	0.0225343	42.1543	0.00372595	6.54722	0.155316		23.9744	1.56674	22.627	9.43301	-118.313	1067.65	23.9744	1.56674	NA
JG-MDS-9-136	246.408	16415.4	1.27663	24.053	28.7705	0.0213645	29.4675	0.00372702	6.37139	0.216217		23.9812	1.5251	21.4647	6.2588	-252.206	741.197	23.9812	1.5251	NA
JG-MDS-9-101	886.531	19252.2	2.06448	20.2867	6.57112	0.0253379	6.78398	0.00372803	1.68606	0.248535		23.9878	0.403696	25.4071	1.70223	161.792	153.79	23.9878	0.403696	NA
JG-MDS-9-35	216.62	3292.49	1.58469	35.4105	75.527	0.0145752	75.8464	0.00374322	6.9541	0.0916865		24.0853	1.67179	14.6926	11.064	NA	NA	24.0853	1.67179	NA
JG-MDS-9-59	221.532	6369.03	1.42499	28.2467	67.7537	0.0183199	68.0548	0.00375309	6.39553	0.0939762		24.1487	1.54155	18.4333	12.4322	-676.929	2101.13	24.1487	1.54155	NA
JG-MDS-9-36	394.697	6743.56	1.41541	24.6904	30.3142	0.020986	30.837	0.00375799	5.65443	0.183365		24.1801	1.36469	21.0883	6.43601	-318.856	792.91	24.1801	1.36469	NA
JG-MDS-9-69	757.95	14061.2	1.48341	22.0273	6.67526	0.0235974	7.25884	0.00376984	2.85162	0.392848		24.2563	0.690397	23.6821	1.69915	-34.2075	162.105	24.2563	0.690397	NA
JG-MDS-9-77	164.25	731.918	1.33503	23.1564	56.7623	0.0225811	58.8481	0.0037924	15.5284	0.263872		24.4012	3.78194	22.6734	13.1957	-156.934	1525.42	24.4012	3.78194	NA
JG-MDS-9-68	144.033	3852.61	0.845511	10.5394	92.6255	0.0500599	93.23	0.00382652	10.5997	0.113694		24.6202	2.60469	49.5987	45.1594	1525.72	80.0568	24.6202	2.60469	NA
JG-MDS-9-82	218.341	3811.24	1.64664	25.7874	32.386	0.0204871	32.8487	0.00383167	5.49395	0.16725		24.6533	1.35185	20.5921	6.6962	-431.667	868.992	24.6533	1.35185	NA
JG-MDS-9-149	592.775	12998.7	2.11407	21.7287	15.4777	0.0243758	15.5591	0.00384142	1.59001	0.102191		24.7159	0.392233	24.454	3.75939	-1.19908	375.039	24.7159	0.392233	NA
JG-MDS-9-87	346.812	11469.1	0.658263	22.8408	24.9129	0.0232286	25.1877	0.00384799	3.71056	0.147316		24.7581	0.916902	23.3162	5.80595	-122.958	623.002	24.7581	0.916902	NA
JG-MDS-9-115	271.323	7552.44	0.825985	16.8916	25.5216	0.0315293	25.8398	0.00386263	4.04303	0.156465		24.8521	1.00284	31.52	8.01976	574.494	563.4	24.8521	1.00284	NA
JG-MDS-9-123	108.94	1878.07	2.03386	2.4258	959.843	0.220375	959.892	0.00387719	9.76018	0.010168		24.9456	2.43003	202.222	#NUM!	3954.31	211.876	24.9456	2.43003	NA
JG-MDS-9-127	1920.97	62353.5	2.181	21.1678	5.61694	0.0253507	5.69863	0.00389191	0.96144	0.168714		25.0402	0.240279	25.4198	1.4306	61.4368	133.906	25.0402	0.240279	NA
JG-MDS-9-76	130.138	1877.22	1.78949	14.9941	41.7326	0.0363194	43.6075	0.00394964	12.6495	0.290075		25.4108	3.20801	36.2242	15.5192	828.194	909.666	25.4108	3.20801	NA
JG-MDS-9-39	328.074	12486.3	2.39768	22.6953	44.5856	0.0240615	44.7307	0.00396056	3.59927	0.0804654		25.481	0.915319	24.1423	10.6721	-107.2	1147.94	25.481	0.915319	NA
JG-MDS-9-86	784.916	13475	2.23395	23.7574	7.59937	0.0230274	7.79674	0.00396774	1.74318	0.223578		25.5271	0.444102	23.1165	1.78197	-220.997	191.426	25.5271	0.444102	NA
JG-MDS-9-105	687.143	9437.57	0.727166	22.5513	13.2975	0.0245284	13.4155	0.00401181	1.7751	0.132318		25.81	0.457239	24.6052	3.26125	-91.5683	327.394	25.81	0.457239	NA
JG-MDS-9-67	259.889	7005.42	1.41111	5.81662	758.462	0.0951043	758.495	0.00401208	7.12663	0.00939575		25.8118	1.83583	92.2471	802.701	2576.42	1314.85	25.8118	1.83583	NA
JG-MDS-9-83	562.593	14749.7	2.39664	21.1162	7.64684	0.0263544	7.99688	0.00403616	2.34005	0.292621		25.9664	0.606405	26.4133	2.085	67.2429	182.211	25.9664	0.606405	NA
JG-MDS-9-23	48.4685	792.871	1.55656	2.03483	468.739	0.280076	469.281	0.00413337	22.5632	0.0480803		26.5905	5.98731	250.718	#NUM!	NA	NA	26.5905	5.98731	NA
JG-MDS-9-64	642.411	9993.87	1.46378	21.9806	15.6256	0.026133	15.9727	0.00416608	3.3118	0.207341		26.8005	0.885737	26.1942	4.13044	-29.0676	380.67	26.8005	0.885737	NA
JG-MDS-9-28	288.193	4088.58	1.06655	26.668	31.5263	0.0215872	31.9513	0.00417528	5.19424	0.162567		26.8596	1.39225	21.6861	6.85562	-520.623	860.39	26.8596	1.39225	NA
JG-MDS-9-114	2748.5	39441.4	1.55851	21.2369	1.67316	0.0271984	1.75593	0.00418923	0.532758	0.303405		26.9491	0.143274	27.2479	0.472091	53.7031	39.9304	26.9491	0.143274	NA
JG-MDS-9-37	129.456	2977.72	2.17676	33.0031	107.145	0.0175405	107.745	0.00419852	11.3509	0.10535		27.0087	3.05932	17.656	18.8611	-1128.39	0	27.0087	3.05932	NA
JG-MDS-9-38	170.612	1040.15	1.07575	13.5571	46.5081	0.0428307	48.2958	0.00421135	13.0185	0.269558		27.0911	3.51946	42.584	20.1436	1034.94	994.935	27.0911	3.51946	NA
JG-MDS-9-24	554.457	11702.2	1.03724	25.1413	13.9101	0.0237411	14.2965	0.004329	3.30154	0.230934		27.8463	0.917374	23.8246	3.36644	-365.513	361.645	27.8463	0.917374	NA
JG-MDS-9-84	233.942	6200.99	1.3868	25.4612	40.6356	0.0235154	40.901	0.00434242	4.65152	0.113726		27.9324	1.29647	23.6008	9.54192	-398.368	1098.02	27.9324	1.29647	NA
JG-MDS-9-94	199.718	1898.82	1.36935	17.7096	52.7627	0.0338722	53.5763	0.00435062	9.30136	0.17361		27.9851	2.59735	33.8236	17.8248	470.782	1254.24	27.9851	2.59735	NA
JG-MDS-9-142	275.825	5209.56	2.24926	22.8482	14.7935	0.0270639	15.3655	0.00448479	4.15356	0.270317		28.8462	1.19547	27.1149	4.11124	-123.758	366.821	28.8462	1.19547	NA
JG-MDS-9-27	190.401	8500.21	1.15118	25.7524	31.285	0.0240143	31.6192	0.00448525	4.58513	0.145011		28.8492	1.31981	24.0955	7.52927	-428.108	837.549	28.8492	1.31981	NA
JG-MDS-9-117	183.238	3671.99	1.23426	18.5474	89.2664	0.0350353	89.5054	0.0047129	6.5358	0.0730213		30.31	1.97635	34.9652	30.7725	367.511	2784.42	30.31	1.97635	NA
JG-MDS-9-103	249.754	5056.7	2.56101	27.8054	35.5943	0.026168	35.937	0.00527715	4.95102	0.137769		33.9292	1.67543	26.2289	9.30543	-633.623	1000.39	33.9292	1.67543	NA
JG-MDS-9-25	264.785	2600.76	1.6003	14.8632	9.06763	0.0551439	9.74065	0.00594439	3.55785	0.365258		38.2065	1.35531	54.5028	5.16901	846.459	188.956	38.2065	1.35531	NA
JG-MDS-9-121	135.211	4196.79	1.72623	31.4514	51.724	0.0267281	52.1833	0.00609688	6.90859	0.132391		39.1837	2.69883	26.783	13.7944	-983.829	1618.8	39.1837	2.69883	NA
JG-MDS-9-119	473.491	14431.3	1.83988	22.3592	10.9299	0.0390058	11.1915	0.00632534	2.40579	0.214966		40.6474	0.974815	38.8529	4.26611	-70.6225	267.706	40.6474	0.974815	NA
JG-MDS-9-96	191.351	3695	1.23002	24.2142	22.4878	0.0372349	22.842	0.00653912	4.00733	0.175437		42.0166	1.67827	37.1208	8.32621	-269.143	577.253	42.0166	1.67827	NA
JG-MDS-9-55	465.354	13290.1	1.05456	22.9323	9.38367	0.0395887	10.5921	0.00658442	4.91327	0.46386		42.3068	2.07184	39.4224	4.09568	-132.83	232.442	42.3068	2.07184	NA
JG-MDS-9-89	260.336	4592.23	1.19935	25.636	17.5554	0.0401436	17.8183	0.00746387	3.0496	0.17115		47.9365	1.45645	39.9642	6.98274	-416.232	462.236	47.9365	1.45645	NA
JG-MDS-9-20	170.485	5249.71	0.625877	18.6023	25.4207	0.0596409	25.7607	0.00804655	4.17188	0.161947		51.6638	2.14674	58.8212	14.7233	360.851	581.914	51.6638	2.14674	NA
JG-MDS-9-106	83.6968	4239.56	2.16435	17.1628	43.1858	0.0672105	43.6134	0.00836611	6.09213	0.139685		53.707	3.25831	66.0488	27.8962	539.785	988.833	53.707	3.25831	NA
JG-MDS-9-98	98.9172	2794.41	1.61656	24.6668	38.8911	0.0598249	39.132	0.0107027	4.33501	0.110779		68.6275	2.95923	58.9975	22.4326	-316.408	1030.56	68.6275	2.95923	NA
JG-MDS-9-118	190.298	5316.57	1.74581	27.0961	34.4083	0.0546441	34.5744	0.0107386	3.38505	0.0979064		68.8566	2.31843	54.0218	18.1915	-563.393	951.325	68.8566	2.31843	NA
JG-MDS-9-145	129.774	6779.95	2.20307	20.8573	31.6823	0.0722315	31.9732	0.0109266	4.30299	0.134581		70.0552	2.99815	70.8149	21.8737	96.5491	766.836	70.0552	2.99815	NA
JG-MDS-9-111	149.046	7833.01	1.36728	25.9238	17.9473	0.0603224	18.128	0.0113417	2.55288	0.140825		72.7015	1.84556	59.474	10.4721	-445.541	475.552	72.7015	1.84556	NA
JG-MDS-9-129	189.67	5674.42	2.06392	20.7266	11.5753	0.0756941	12.1077	0.0113786	3.55118	0.293298		72.9371	2.57553	74.0885	8.6512	111.424	273.991	72.9371	2.57553	NA
JG-MDS-9-138	423.534	15546.5	1.79088	21.4832	7.16671	0.0746649	7.27184	0.0116336	1.23206	0.169429		74.5623	0.91336	73.1166	5.13005	26.0714	172.08	74.5623	0.91336	NA
JG-MDS-9-133	67.5431	8459.58	4.28623	27.3671	60.9155	0.059699	61.1397	0.0118494	5.23032	0.0855471		75.9368	3.94844	58.8769	34.9872	-590.32	1805.76	75.9368	3.94844	NA
JG-MDS-9-126	606.016	37460.1	1.64858	21.6204	5.59838	0.0862928	5.68693	0.0135312	0.999637	0.175778		86.6429	0.860319	84.0441	4.5871	10.7878	134.741	86.6429	0.860319	NA
JG-MDS-9-42	368.203	24164.3	2.11825	20.0894	5.56945	0.0936317	5.78456	0.0136423	1.56282	0.270171		87.3495	1.35591	90.8809	5.0287	184.599	129.789	87.3495	1.35591	NA
JG-MDS-9-4	255.669	20924.1	1.83715	20.7588	5.75313	0.094013	5.98668	0.0141543	1.65586	0.27659		90.605	1.4898	91.2348	5.22379	107.762	135.969	90.605	1.4898	NA
JG-MDS-9-10	271.807	8523.62	1.35357	21.2623	8.72719	0.0924097	8.87316	0.0142504	1.60286	0.180641		91.2156	1.45176	89.7456	7.62164	50.8217	208.665	91.2156	1.45176	NA
JG-MDS-9-52	177.998	7084.61	1.73933	23.4395	11.8544	0.0856839	12.0718	0.0145662	2.28109	0.188959		93.2226	2.11119	83.4748	9.67415	-187.219	297.111	93.2226	2.11119	NA
JG-MDS-9-48	498.446	34746.5	1.59421	20.3882	5.51866	0.101414	5.79091	0.014996	1.75472	0.303013		95.9525	1.67123	98.0804	5.4141	150.13	129.431	95.9525	1.67123	NA
JG-MDS-9-2	454.309	32540.9	1.88889	20.0419	6.72651	0.10549	6.90811	0.0153339	1.57352	0.227779		98.0981	1.53191	101.832	6.6935	190.146	156.659	98.0981	1.53191	NA
JG-MDS-9-46	90.3919	8723.28	1.55249	18.7918	18.8481	0.113387	20.0989	0.0154537	6.97972	0.347269		98.859	6.84744	109.059	20.7865	337.937	430.314	98.859	6.84744	NA
JG-MDS-9-95	275.496	14000	1.24881	18.6322	7.59486	0.114471	7.65469	0.0154689	0.95515	0.12478		98.9555	0.937956	110.047	7.98352	357.231	171.696	98.9555	0.937956	NA
JG-MDS-9-3	323.259	24120.4	1.66888	21.8375	7.89692	0.0981635	7.96943	0.0155472	1.07265	0.134595		99.4523	1.05859	95.0797	7.23349	-13.2532	191.057	99.4523	1.05859	NA
JG-MDS-9-104	591.674	44190.6	1.159	21.4359	4.3543	0.10034	4.39546	0.0155996	0.600157	0.13654		99.7854	0.594258	97.0903	4.06991	31.364	104.376	99.7854	0.594258	NA
JG-MDS-9-65	208.022	9329.73	2.17788	20.2279	13.6763	0.106349	13.8688	0.015602	2.30275	0.166038		99.8006	2.28046	102.62	13.5374	168.573	320.701	99.8006	2.28046	NA
JG-MDS-9-144	366.472	19307.2	1.771	21.3112	4.91234	0.101751	5.50806	0.015727	2.4915	0.452338		100.594	2.48684	98.3913	5.1652	45.3715	117.434	100.594	2.48684	NA
JG-MDS-9-50	283.943	16616	1.54542	19.5926	9.01151	0.111399	9.15276	0.0158296	1.60176	0.175003		101.245	1.60904	107.244	9.31545	242.605	208.003	101.245	1.60904	NA
JG-MDS-9-91	156.642	3755.22	1.25819	19.9636	9.24661	0.110307	9.63689	0.0159714	2.71472	0.281701		102.145	2.75109	106.247	9.72168	199.202	215.133	102.145	2.75109	NA
JG-MDS-9-130	264.239	16384.2	1.54462	20.1827	11.4779	0.112068	12.1355	0.0164044	3.94062	0.324717		104.892	4.09993	107.856	12.4183	173.794	268.565	104.892	4.09993	NA
JG-MDS-9-63	147.367	13092.1	1.46275	19.9826	15.9358	0.113378	16.3692	0.0164317	3.74161	0.228577		105.064	3.89924	109.051	16.9271	196.989	372.316	105.064	3.89924	NA
JG-MDS-9-47	52.423	2976.04	1.63901	29.0508	44.9265	0.078803	45.1316	0.0166035	4.29692	0.0952089		106.154	4.52401	77.0189	33.4864	-755.136	1317.7	106.154	4.52401	NA
JG-MDS-9-146	75.3051	8415.45	1.52847	19.8574	36.1884	0.115475	36.281	0.0166307	2.5907	0.0714063		106.326	2.732	110.961	38.1542	211.578	864.111	106.326	2.732	NA
JG-MDS-9-140	213.202	16286.6	1.47205	21.3842	12.1824	0.108194	12.2346	0.0167802	1.12896	0.0922761		107.274	1.20106	104.312	12.1291	37.1391	292.505	107.274	1.20106	NA
JG-MDS-9-128	417.016	31384.4	1.66477	21.1231	4.06	0.11066	4.43328	0.016953	1.78055	0.401634		108.37	1.91346	106.569	4.48506	66.4963	96.6531	108.37	1.91346	NA
JG-MDS-9-11	382.695	40206.7	1.13684	20.4684	6.20158	0.116235	6.30034	0.0172552	1.11116	0.176366		110.286	1.21503	111.653	6.66166	140.936	145.691	110.286	1.21503	NA
JG-MDS-9-62	75.8198	11531.3	2.07264	21.7716	22.4348	0.11367	22.8303	0.0179488	4.23139	0.185341		114.679	4.80961	109.317	23.6651	-5.96131	547.238	114.679	4.80961	NA
JG-MDS-9-137	173.039	2065.33	4.28842	21.7014	34.9909	0.114113	36.0923	0.0179607	8.84807	0.245151		114.754	10.0637	109.721	37.5533	1.78421	866.365	114.754	10.0637	NA
JG-MDS-9-21	135.099	13869	1.74774	19.82	13.6424	0.1256	13.8716	0.0180548	2.51086	0.181008		115.351	2.87054	120.137	15.718	215.989	317.154	115.351	2.87054	NA
JG-MDS-9-120	84.7085	7352.85	2.6243	22.1806	18.0217	0.115066	18.1657	0.0185104	2.28271	0.125661		118.235	2.67437	110.589	19.0361	-51.0608	441.653	118.235	2.67437	NA
JG-MDS-9-51	133.006	16795.8	1.85052	22.9006	18.8477	0.112972	18.8889	0.0187636	1.2465	0.0659913		119.837	1.47998	108.681	19.4705	-129.412	469.216	119.837	1.47998	NA
JG-MDS-9-31	213.043	20266.7	1.26574	21.5372	9.5135	0.120465	9.66408	0.0188169	1.69937	0.175844		120.175	2.02329	115.493	10.5504	20.0524	228.871	120.175	2.02329	NA
JG-MDS-9-135	92.0382	6241.41	2.26422	25.0273	29.9809	0.105891	30.2639	0.0192209	4.1289	0.13643		122.73	5.01947	102.2	29.4323	-353.749	789.343	122.73	5.01947	NA
JG-MDS-9-66	302.834	12861.1	0.583735	19.6208	7.53777	0.136153	8.15647	0.019375	3.1161	0.382041		123.705	3.81802	129.612	9.92514	239.33	174.012	123.705	3.81802	NA
JG-MDS-9-18	76.774	746.748	1.13261	13.2373	27.0434	0.204531	28.7288	0.0196362	9.69531	0.337477		125.357	12.0363	188.953	49.5716	1082.99	552.275	125.357	12.0363	NA
JG-MDS-9-71	418.554	3301.76	1.85754	18.8684	6.90715	0.144005	7.01272	0.0197066	1.21227	0.172868		125.801	1.51027	136.605	8.96348	328.738	156.891	125.801	1.51027	NA
JG-MDS-9-141	54.7482	6499.26	1.44221	19.7134	30.5799	0.153884	30.9764	0.0220015	4.94059	0.159495		140.293	6.85643	145.335	41.97	228.462	721.478	140.293	6.85643	NA
JG-MDS-9-8	70.485	7543.39	1.05998	18.9768	23.9588	0.160335	24.8056	0.0220674	6.42586	0.259049		140.709	8.9438	150.996	34.8173	315.698	551.898	140.709	8.9438	NA
JG-MDS-9-58	41.4961	4092.26	2.34198	20.698	36.4718	0.148662	37.2919	0.0223166	7.77792	0.208568		142.281	10.9452	140.73	49.0446	114.64	886.675	142.281	10.9452	NA
JG-MDS-9-51	110.279	20006.9	1.57383	20.1136	14.5272	0.156895	14.7573	0.0228874	2.59584	0.175902		145.879	3.74425	147.982	20.324	181.795	340.028	145.879	3.74425	NA
JG-MDS-9-70	44.4924	8589.13	2.09565	18.4568	24.9752	0.171058	25.3585	0.0228981	4.39263	0.173221		145.946	6.33883	160.337	37.6286	378.539	569.666	145.946	6.33883	NA
JG-MDS-9-29	110.424	11696.2	2.28443	27.3508	27.9182	0.11696	28.1062	0.023201	3.24514	0.11546		147.854	4.74348	112.312	29.8921	-588.696	769.209	147.854	4.74348	NA
JG-MDS-9-116	190.119	12818.4	1.14116	21.0056	5.89558	0.156871	6.18282	0.0238989	1.86263	0.301259		152.25	2.80263	147.961	8.51304	79.7239	140.091	152.25	2.80263	NA
JG-MDS-9-34	169.255	45335.2	1.45863	19.9839	9.60208	0.167828	9.793	0.0243245	1.92429	0.196497		154.929	2.94575	157.532	14.2909	196.859	223.533	154.929	2.94575	NA
JG-MDS-9-33	77.6699	8202.6	1.49523	21.2374	18.6172	0.158464	19.452	0.0244079	5.63741	0.289811		155.454	8.65875	149.358	27.0237	53.656	447.514	155.454	8.65875	NA
JG-MDS-9-40	30.0391	2753.05	2.40305	16.141	26.8178	0.20905	28.5073	0.0244726	9.66818	0.339147		155.861	14.8883	192.755	50.0892	672.508	583.443	155.861	14.8883	NA
JG-MDS-9-85	154.493	23170	1.32964	20.1558	13.6921	0.170201	14.1033	0.0248807	3.38101	0.239731		158.428	5.29119	159.594	20.8312	176.902	320.593	158.428	5.29119	NA
JG-MDS-9-17	403.427	52391.3	1.13337	20.9309	3.96766	0.16836	4.04927	0.0255579	0.808819	0.199745		162.687	1.29938	157.995	5.92479	88.2266	94.0705	162.687	1.29938	NA
JG-MDS-9-74	149.928	38423.7	1.66763	20.0518	10.7963	0.177331	11.1242	0.0257891	2.68091	0.240997		164.14	4.34489	165.761	17.0148	188.951	251.834	164.14	4.34489	NA
JG-MDS-9-54	105.595	8739.06	1.12449	19.8984	12.7935	0.179695	12.9268	0.0259331	1.85182	0.143255		165.044	3.01754	167.798	19.996	206.806	297.757	165.044	3.01754	NA
JG-MDS-9-148	395.204	97047.8	0.941589	20.6934	1.93213	0.17765	2.08622	0.0266622	0.786882	0.377181		169.624	1.31733	166.036	3.1955	115.209	45.5731	169.624	1.31733	NA
JG-MDS-9-61	149.42	22438.4	2.64887	18.3704	7.046	0.200822	7.28403	0.0267565	1.84686	0.253549		170.216	3.10251	185.821	12.3696	389.08	158.328	170.216	3.10251	NA
JG-MDS-9-80	78.815	11348.2	1.37808	18.9361	12.4123	0.194829	12.518	0.0267572	1.62303	0.129656		170.221	2.72657	180.741	20.7286	320.632	282.977	170.221	2.72657	NA
JG-MDS-9-134	117.301	11834.9	1.30075	19.5329	9.4716	0.190719	9.61699	0.0270185	1.66593	0.173228		171.861	2.82525	177.243	15.6419	249.628	218.425	171.861	2.82525	NA
JG-MDS-9-102	105.233	11244.5	1.58592	21.8306	11.9485	0.170846	12.1432	0.0270501	2.16543	0.178325		172.06	3.67655	160.153	17.9934	-12.4942	289.559	172.06	3.67655	NA
JG-MDS-9-78	167.28	27508.6	1.56963	21.8341	6.60555	0.170971	6.64837	0.0270743	0.753349	0.113313		172.211	1.28017	160.261	9.85676	-12.8867	159.742	172.211	1.28017	NA
JG-MDS-9-16	199.301	27877.8	1.932	20.4021	5.97642	0.183343	6.06491	0.0271293	1.03224	0.170198		172.556	1.75756	170.933	9.5416	148.525	140.208	172.556	1.75756	NA
JG-MDS-9-41	554.973	58620.2	2.11373	20.56	3.28653	0.182399	3.34706	0.0271985	0.633675	0.189323		172.991	1.08162	170.123	5.24271	130.442	77.3231	172.991	1.08162	NA
JG-MDS-9-15	408.425	2613.21	0.85227	18.6715	2.71013	0.210377	2.95922	0.0284888	1.18835	0.401577		181.083	2.12197	193.869	5.22261	352.475	61.2209	181.083	2.12197	NA
JG-MDS-9-79	765.008	102137	1.52572	20.1567	0.936695	0.203475	1.24072	0.029746	0.81363	0.655772		188.958	1.51511	188.062	2.13	176.804	21.8287	188.958	1.51511	NA
JG-MDS-9-26	507.093	100858	1.38168	19.9943	1.58116	0.205654	1.65193	0.0298223	0.478327	0.289557		189.436	0.892938	189.899	2.86112	195.68	36.7272	189.436	0.892938	NA
JG-MDS-9-75	196.225	30015.3	3.52816	19.4072	5.21482	0.217061	5.32356	0.0305522	1.07048	0.201084		194.003	2.04583	199.46	9.64081	264.488	119.741	194.003	2.04583	NA
JG-MDS-9-112	73.0081	24250.9	1.362	19.4141	10.8259	0.360317	10.8952	0.0507341	1.22684	0.112604		319.027	3.81868	312.451	29.311	263.67	249.148	319.027	3.81868	NA
JG-MDS-9-45	76.7443	22107.2	0.75559	19.3424	5.48721	0.414888	5.76938	0.0582024	1.7822	0.308906		364.684	6.31897	352.389	17.1795	272.135	125.835	364.684	6.31897	NA
JG-MDS-9-14	22.3558	11157.3	2.13371	21.2314	23.4844	0.487701	23.8148	0.0750985	3.95334	0.166003		466.8	17.8019	403.343	79.4328	54.3061	566.992	466.8	17.8019	859.571
JG-MDS-9-90	588.856	324284	0.930219	15.7755	0.46119	1.0169	0.838104	0.116348	0.699801	0.834982		709.51	4.70168	712.352	4.29065	721.297	9.80669	709.51	4.70168	98.3659
JG-MDS-9-5	111.341	105646	1.65854	12.7947	0.910852	2.12561	1.66683	0.197248	1.39595	0.837487		1160.52	14.8258	1157.16	11.5104	1150.88	18.0694	1150.88	18.0694	100.838
JG-MDS-9-139	36.975	52234.9	1.16262	12.789	1.34903	2.20865	1.74554	0.204862	1.10772	0.634597		1201.39	12.1415	1183.78	12.2007	1151.74	26.7907	1151.74	26.7907	104.31
JG-MDS-9-93	266.574	236505	5.89659	12.6687	0.588747	1.97948	1.13723	0.181879	0.97297	0.855561		1077.23	9.65222	1108.54	7.67181	1170.48	11.6751	1170.48	11.6751	92.0332
JG-MDS-9-13	68.1167	4266.06	1.44227	9.18781	0.914539	4.51049	1.18017	0.300563	0.745936	0.632058		1694.1	11.1128	1732.91	9.80893	1780.07	16.6795	1780.07	16.6795	95.1703
JG-MDS-9-100	34.2077	40788.4	0.824547	7.52348	1.30864	6.72778	1.77956	0.367104	1.20594	0.677661		2015.76	20.8753	2076.28	15.7324	2136.85	22.8895	2136.85	22.8895	94.3333
JG-MDS10
JG-MDS10_76	228.576	1922.88	0.818639	5.20683	241.573	0.0486523	241.779	0.00183728	9.96638	0.0412211		11.833	1.17824	48.2366	114.38	2759.83	230.656	11.833	1.17824	NA
JG-MDS10_119	339.777	3624.3	1.20017	20.2726	81.8166	0.01334	82.201	0.0019614	7.94018	0.0965948		12.6316	1.00199	13.4557	10.9882	163.409	2396.34	12.6316	1.00199	NA
JG-MDS10_11	551.481	3376.45	1.65138	19.8404	22.2214	0.0247265	22.5357	0.00355804	3.75039	0.16642		22.8959	0.857163	24.8014	5.52153	213.607	520.358	22.8959	0.857163	NA
JG-MDS10_64	1107.72	19458.3	1.454	21.8905	11.2794	0.0228733	12.1925	0.00363147	4.62961	0.379708		23.3676	1.07987	22.9635	2.76842	-19.1209	273.593	23.3676	1.07987	NA
JG-MDS10_86	194.129	4173.72	1.25325	10.5767	77.2476	0.0493807	77.4596	0.00378796	5.72621	0.0739252		24.3726	1.39299	48.9416	37.0272	1519.06	1811.47	24.3726	1.39299	NA
JG-MDS10_113	1624.87	26227.3	1.24543	21.5909	5.59167	0.0245158	5.7191	0.00383897	1.20056	0.209922		24.7002	0.295974	24.5927	1.38959	14.0844	134.512	24.7002	0.295974	NA
JG-MDS10_3	275.31	3215.03	1.41877	23.3409	38.7903	0.0228338	39.4356	0.00386541	7.10488	0.180164		24.87	1.76358	22.9244	8.93931	-176.689	1000.1	24.87	1.76358	NA
JG-MDS10_20	115.435	2173.63	1.99192	20.834	32.8607	0.0444884	34.2176	0.00672232	9.5403	0.278813		43.1899	4.10667	44.1968	14.7997	99.1746	796.383	43.1899	4.10667	NA
JG-MDS10_40	148.848	3239.13	0.778415	15.2982	25.466	0.0609735	25.8922	0.00676518	4.67825	0.180682		43.4643	2.02653	60.0974	15.1101	786.16	543.064	43.4643	2.02653	NA
JG-MDS10_114	202.383	11700	2.00133	23.4271	20.9917	0.0803253	21.3845	0.013648	4.0798	0.190783		87.386	3.54112	78.4507	16.1459	-185.897	529.333	87.386	3.54112	NA
JG-MDS10_42	358.179	45403.4	4.66531	21.8012	6.58376	0.089286	6.96966	0.0141176	2.28699	0.328134		90.3717	2.05237	86.838	5.8008	-9.2369	159.113	90.3717	2.05237	NA
JG-MDS10_4	72.8057	4411.75	1.36384	20.4599	20.7463	0.096648	21.743	0.0143415	6.50774	0.299302		91.7945	5.93142	93.6775	19.4594	141.908	491.505	91.7945	5.93142	NA
JG-MDS10_63	211.752	10189.7	2.72784	20.0721	11.9762	0.100026	12.2575	0.0145614	2.61087	0.213003		93.1922	2.41563	96.8004	11.3177	186.602	279.651	93.1922	2.41563	NA
JG-MDS10_32	732.759	74139.5	18.8632	21.0407	3.30235	0.0966126	3.48224	0.0147432	1.10475	0.317253		94.347	1.03471	93.6447	3.11509	75.7665	78.4892	94.347	1.03471	NA
JG-MDS10_1	247.639	15830.8	1.80851	22.1318	9.88333	0.09364	9.95238	0.0150306	1.17029	0.117589		96.1724	1.11714	90.8886	8.65275	-45.7035	240.798	96.1724	1.11714	NA
JG-MDS10_97	188.843	8726.19	2.03072	24.3059	15.7265	0.0855428	15.847	0.0150797	1.95035	0.123074		96.4845	1.86778	83.3428	12.6805	-278.751	402.277	96.4845	1.86778	NA
JG-MDS10_107	152.976	6652.95	1.51807	26.7329	22.4618	0.0780631	22.6344	0.0151353	2.79016	0.123271		96.8375	2.68173	76.3223	16.6433	-527.132	607.508	96.8375	2.68173	NA
JG-MDS10_59	327.032	27494.6	1.65588	20.6505	5.35311	0.10139	5.62579	0.0151853	1.73023	0.307553		97.155	1.6684	98.0583	5.2586	120.09	126.216	97.155	1.6684	NA
JG-MDS10_84	730.791	27892.7	2.04352	20.8183	3.14238	0.100825	3.31984	0.0152234	1.07089	0.322573		97.3969	1.03518	97.5376	3.08744	100.969	74.3122	97.3969	1.03518	NA
JG-MDS10_67	188.613	18797.9	2.07129	20.6923	20.8747	0.101479	21.0418	0.0152294	2.64622	0.12576		97.4347	2.55895	98.1402	19.6863	115.337	497.053	97.4347	2.55895	NA
JG-MDS10_36	324.982	24970.1	2.59057	20.227	8.88158	0.104271	9.08029	0.0152966	1.88927	0.208062		97.8619	1.83491	100.711	8.70622	168.669	207.768	97.8619	1.83491	NA
JG-MDS10_92	220.115	1497.04	1.19498	17.9525	9.23394	0.119982	9.44991	0.0156221	2.00879	0.212573		99.9278	1.99187	115.055	10.2796	440.512	205.821	99.9278	1.99187	NA
JG-MDS10_19	101.706	10772.6	1.9462	23.2751	32.7045	0.0927231	32.9991	0.0156523	4.39942	0.13332		100.12	4.37066	90.0369	28.4395	-169.652	833.579	100.12	4.37066	NA
JG-MDS10_78	857.405	53938.2	2.67809	20.6326	3.50823	0.105121	4.29545	0.0157304	2.47854	0.577016		100.615	2.47443	101.492	4.14877	122.108	82.6626	100.615	2.47443	NA
JG-MDS10_74	61.1232	5994.03	1.7188	29.7773	54.637	0.0728426	55.175	0.0157315	7.68628	0.139307		100.622	7.67406	71.3934	38.0562	-825.069	1665.84	100.622	7.67406	NA
JG-MDS10_6	409.727	44775.5	1.97014	19.8126	7.83372	0.109484	7.99851	0.0157322	1.61524	0.201942		100.627	1.61275	105.493	8.0145	216.845	181.579	100.627	1.61275	NA
JG-MDS10_118	184.052	31546.5	2.13725	22.658	14.4129	0.0957909	14.6388	0.0157414	2.56199	0.175013		100.685	2.55951	92.8836	12.9944	-103.155	355.881	100.685	2.55951	NA
JG-MDS10_8	111.512	12749	1.6316	22.2374	9.48699	0.0977358	10.2047	0.0157629	3.75932	0.368392		100.822	3.76072	94.6841	9.22565	-57.2911	231.606	100.822	3.76072	NA
JG-MDS10_15	258.275	35813.6	1.75478	21.5236	10.4549	0.101182	10.8125	0.0157948	2.75778	0.255054		101.024	2.76431	97.8665	10.0882	21.5855	251.557	101.024	2.76431	NA
JG-MDS10_13	840.311	67950.6	1.27762	20.8582	1.95775	0.104827	2.07931	0.015858	0.700512	0.336897		101.425	0.704936	101.222	2.00322	96.4669	46.3474	101.425	0.704936	NA
JG-MDS10_77	154.489	12109.5	1.59901	23.3981	16.5696	0.0934738	18.5984	0.0158624	8.44682	0.454169		101.453	8.50247	90.7342	16.1445	-182.793	416.101	101.453	8.50247	NA
JG-MDS10_52	161.186	8482.17	1.7003	20.5785	13.8444	0.107511	14.0157	0.016046	2.18493	0.155891		102.618	2.22438	103.686	13.8159	128.332	327.099	102.618	2.22438	NA
JG-MDS10_83	271.171	11638.6	0.971233	20.4626	10.051	0.108542	10.2161	0.0161086	1.829	0.179032		103.015	1.86918	104.631	10.1572	141.57	236.417	103.015	1.86918	NA
JG-MDS10_25	225.112	26865.1	1.59683	22.0388	10.5977	0.101277	10.8432	0.0161881	2.29389	0.211551		103.52	2.35566	97.9543	10.1254	-35.4789	257.769	103.52	2.35566	NA
JG-MDS10_34	55.3225	4233.28	2.04572	14.4871	22.2643	0.155581	23.0746	0.0163469	6.06107	0.262673		104.527	6.28435	146.827	31.5544	899.532	464.677	104.527	6.28435	NA
JG-MDS10_10	222.135	17044.5	1.55202	20.0822	10.6175	0.112818	10.7399	0.0164319	1.6171	0.150569		105.066	1.68525	108.54	11.0561	185.433	247.799	105.066	1.68525	NA
JG-MDS10_58	129.897	8498.06	1.17452	21.1446	22.9963	0.109368	23.3033	0.0167721	3.77037	0.161795		107.223	4.00927	105.387	23.3312	64.0862	553.933	107.223	4.00927	NA
JG-MDS10_115	112.545	7354.2	2.64381	21.585	20.8138	0.107425	20.9888	0.0168173	2.7049	0.128873		107.51	2.88392	103.607	20.6761	14.7697	504.957	107.51	2.88392	NA
JG-MDS10_48	88.2391	8424.18	1.79239	30.8328	71.9803	0.0753848	72.1428	0.0168576	4.83839	0.0670668		107.765	5.17075	73.7966	51.3941	-925.524	2396.98	107.765	5.17075	NA
JG-MDS10_37	494.097	37603.2	1.43809	20.7144	5.03844	0.112878	5.11466	0.0169581	0.879712	0.171998		108.403	0.945657	108.594	5.26758	112.783	118.964	108.403	0.945657	NA
JG-MDS10_39	98.6018	6272.13	1.92139	24.221	27.4068	0.097315	27.601	0.017095	3.26815	0.118407		109.27	3.54102	94.2948	24.8594	-269.851	707.323	109.27	3.54102	NA
JG-MDS10_33	132.408	8578.13	1.13427	24.09	20.7859	0.0982777	20.9108	0.0171708	2.28199	0.10913		109.75	2.48329	95.1853	19.0018	-256.096	531.35	109.75	2.48329	NA
JG-MDS10_56	39.1222	3279.26	1.83825	13.4856	58.0605	0.176042	58.3278	0.0172181	5.57805	0.0956328		110.05	6.08656	164.649	88.8805	1045.66	1289.13	110.05	6.08656	NA
JG-MDS10_95	467.925	17784.6	7.32778	20.8206	3.84483	0.114046	4.70979	0.0172216	2.72018	0.577559		110.073	2.96875	109.66	4.89567	100.725	90.9883	110.073	2.96875	NA
JG-MDS10_55	147.902	29204.7	1.12685	19.8884	16.8303	0.120075	17.0496	0.0173202	2.72569	0.159868		110.697	2.99151	115.14	18.5609	207.958	392.663	110.697	2.99151	NA
JG-MDS10_31	102.35	7761.25	1.66467	19.4727	9.94801	0.123248	10.4178	0.0174062	3.09306	0.296902		111.242	3.41126	118.012	11.6072	256.774	229.134	111.242	3.41126	NA
JG-MDS10_56	322.249	47327.4	0.821793	20.232	5.45924	0.119302	6.75849	0.017506	3.9842	0.58951		111.875	4.41885	114.439	7.31457	168.096	127.597	111.875	4.41885	NA
JG-MDS10_5	66.5332	3722.65	1.552	21.7739	27.3084	0.111613	27.7581	0.0176259	4.97617	0.179269		112.634	5.55617	107.44	28.3069	-6.2202	669.755	112.634	5.55617	NA
JG-MDS10_14	511.894	38116.2	2.83996	20.9373	6.83117	0.11883	6.91875	0.0180444	1.09738	0.158609		115.285	1.25386	114.01	7.4615	87.5084	162.129	115.285	1.25386	NA
JG-MDS10_99	108.842	9870.03	1.54583	23.3191	23.4938	0.107646	23.7294	0.0182058	3.336	0.140585		116.307	3.8452	103.81	23.4203	-174.364	592.514	116.307	3.8452	NA
JG-MDS10_50	59.9452	4816.39	1.12838	22.6097	42.3166	0.111672	42.5053	0.0183121	4.00088	0.0941267		116.98	4.63801	107.494	43.3816	-97.9134	1082.24	116.98	4.63801	NA
JG-MDS10_29	75.0185	7565.19	1.13643	25.3205	41.8401	0.100825	42.2792	0.0185156	6.0772	0.14374		118.268	7.12182	97.5371	39.3388	-383.939	1129.97	118.268	7.12182	NA
JG-MDS10_98	192.533	3228.94	1.10058	21.0983	9.79598	0.12107	10.0146	0.018526	2.08131	0.207827		118.334	2.44042	116.041	10.9821	69.2703	233.521	118.334	2.44042	NA
JG-MDS10_62	143.468	17103.5	1.57233	24.4259	14.5355	0.104636	15.5346	0.0185366	5.48114	0.352834		118.4	6.43046	101.046	14.9425	-291.304	372.47	118.4	6.43046	NA
JG-MDS10_120	49.1733	4758.83	1.96201	27.4176	54.7843	0.0934968	54.9616	0.018592	4.41122	0.08026		118.751	5.19041	90.7555	47.7516	-595.323	1593.38	118.751	5.19041	NA
JG-MDS10_102	133.764	13255.6	1.65661	19.6422	15.4654	0.134603	16.4811	0.0191754	5.69644	0.345634		122.442	6.90902	128.225	19.8556	236.795	358.591	122.442	6.90902	NA
JG-MDS10_26	71.4892	7980.2	0.996157	22.8157	27.0828	0.135937	27.2134	0.0224942	2.66276	0.0978475		143.4	3.77625	129.418	33.0788	-120.243	678.595	143.4	3.77625	NA
JG-MDS10_111	59.0787	4042.76	2.25099	26.4227	59.1113	0.117639	59.4724	0.0225438	6.54412	0.110036		143.713	9.30069	112.929	63.6449	-495.983	1708.77	143.713	9.30069	NA
JG-MDS10_82	171.799	40840.5	1.87283	20.4648	10.6262	0.153424	10.7484	0.0227719	1.61615	0.150362		145.151	2.31964	144.931	14.518	141.336	250.022	145.151	2.31964	NA
JG-MDS10_54	62.671	6457.01	0.707748	28.2809	25.1047	0.11198	25.4889	0.0229685	4.40934	0.17299		146.39	6.38209	107.775	26.0688	-680.276	702.957	146.39	6.38209	NA
JG-MDS10_45	34.2508	3262.05	1.48794	14.2988	52.2459	0.223672	53.0537	0.0231958	9.22233	0.17383		147.822	13.4775	204.962	98.7777	926.466	1155.29	147.822	13.4775	NA
JG-MDS10_46	386.233	32624.1	0.768129	21.4152	5.67935	0.150169	5.78634	0.0233239	1.10757	0.191411		148.629	1.62733	142.061	7.67116	33.6946	136.095	148.629	1.62733	NA
JG-MDS10_105	46.5844	2102.1	1.83686	14.4838	26.2268	0.231669	26.7934	0.0243359	5.4806	0.204551		155.001	8.39367	211.575	51.2152	900.001	549.971	155.001	8.39367	NA
JG-MDS10_23	96.7322	8541.65	1.48495	21.821	20.3299	0.15781	20.5216	0.0249751	2.79872	0.136379		159.022	4.39613	148.784	28.4087	-11.4287	495.448	159.022	4.39613	NA
JG-MDS10_30	228.521	25302.4	1.22568	21.213	8.25905	0.163257	8.97841	0.0251172	3.52135	0.392202		159.916	5.56192	153.55	12.7952	56.3669	197.231	159.916	5.56192	NA
JG-MDS10_89	116.123	22852.8	1.17582	21.0713	10.6921	0.170245	10.8812	0.0260175	2.01985	0.185628		165.575	3.30178	159.632	16.0746	72.3324	254.825	165.575	3.30178	NA
JG-MDS10_60	239.539	22090.7	1.14382	20.4624	6.14603	0.176975	6.33651	0.0262644	1.54197	0.243347		167.126	2.54391	165.454	9.67471	141.585	144.38	167.126	2.54391	NA
JG-MDS10_51	229.538	24200.7	1.52374	21.3581	6.73082	0.170394	6.77047	0.0263946	0.731658	0.108066		167.944	1.2129	159.76	10.0088	40.1114	161.147	167.944	1.2129	NA
JG-MDS10_24	384.265	28404.1	1.47805	19.6904	2.91886	0.186156	3.32978	0.0265846	1.60241	0.481236		169.137	2.67502	173.344	5.30621	231.115	67.4121	169.137	2.67502	NA
JG-MDS10_104	502.087	21793.6	7.08468	19.7706	7.74439	0.194562	8.78702	0.0278983	4.15165	0.472475		177.381	7.26384	180.515	14.5329	221.761	179.343	177.381	7.26384	NA
JG-MDS10_21	127.497	16067.7	1.50056	20.1421	9.07716	0.200258	9.23007	0.0292545	1.67313	0.181269		185.881	3.06561	185.344	15.6381	178.489	211.978	185.881	3.06561	NA
JG-MDS10_91	92.55	16717.6	2.25095	21.1478	18.8152	0.197817	18.924	0.0303408	2.02659	0.107091		192.681	3.84708	183.278	31.7437	63.7354	451.494	192.681	3.84708	NA
JG-MDS10_41	286.12	41963.6	2.28407	19.568	4.31631	0.255768	4.52576	0.0362987	1.36087	0.300695		229.849	3.07285	231.251	9.35989	245.519	99.4277	229.849	3.07285	NA
JG-MDS10_49	134.51	45814.3	2.42262	18.3798	4.92779	0.3954	5.01873	0.0527081	0.951061	0.189502		331.126	3.0697	338.307	14.4408	387.933	110.705	331.126	3.0697	NA
JG-MDS10_68	51.0516	20807.3	1.06653	15.9371	8.19767	0.686994	8.58496	0.0794074	2.54948	0.29697		492.585	12.0905	530.992	35.5128	699.633	174.836	492.585	12.0905	70.4062
JG-MDS10_18	101.992	57584.6	1.52854	14.102	2.17587	1.55018	2.7754	0.158548	1.72292	0.620783		948.705	15.1996	950.567	17.132	954.86	44.4998	954.86	44.4998	99.3554
JG-MDS10_108	188.23	205499	2.80443	11.3396	0.561383	3.03672	1.77707	0.249748	1.68607	0.948791		1437.18	21.7208	1416.9	13.5749	1386.53	10.7784	1386.53	10.7784	103.653
JG-MDS10_93	219.357	354202	1.38391	9.52004	0.576948	4.32305	1.91237	0.298488	1.82327	0.953405		1683.81	27.0184	1697.77	15.7713	1715.03	10.6092	1715.03	10.6092	98.1798
JG-MDS10_72	12.305	14973	30.7478	8.3578	6.5611	5.90422	9.40885	0.357893	6.74377	0.716747		1972.18	114.592	1961.85	81.8756	1950.97	117.353	1950.97	117.353	101.087
JG-MDS12
JG-MDS12_85	186.568	778.429	1.87361	6.2127	170.754	0.0330142	172.031	0.00148758	20.9206	0.121609		9.58242	2.00321	32.9806	55.8816	2465.76	291.779	9.58242	2.00321	NA
JG-MDS12_112	160.01	1248.22	1.60703	-4.71346	256.346	-0.0467058	256.642	0.00159665	12.3148	0.0479844		10.2844	1.2655	-48.5675	-128.353	NA	NA	10.2844	1.2655	NA
JG-MDS12_9	148.772	1743.55	1.73661	12.5961	147.753	0.0175284	149.481	0.00160131	22.6606	0.151595		10.3145	2.33545	17.6438	26.1521	1181.89	480.43	10.3145	2.33545	NA
JG-MDS12_118	189.634	829.591	1.48339	25.1405	172.379	0.00884263	172.803	0.00161233	12.1004	0.0700241		10.3854	1.25566	8.93919	15.3806	-365.431	0	10.3854	1.25566	NA
JG-MDS12_4	132.8	991.748	1.8356	3.89111	356.771	0.0573763	357.207	0.00161922	17.6431	0.0493917		10.4297	1.83863	56.6488	199.334	3228.37	231.402	10.4297	1.83863	NA
JG-MDS12_46	169.752	802.69	1.85047	6.99412	168.052	0.0320663	171.247	0.0016266	32.9279	0.192283		10.4772	3.44713	32.0484	54.0761	2263.56	171.629	10.4772	3.44713	NA
JG-MDS12_41	405.137	3007.82	0.763559	22.4514	41.8229	0.00999539	43	0.00162758	9.9921	0.232374		10.4835	1.04667	10.0988	4.32097	-80.6855	1065.05	10.4835	1.04667	NA
JG-MDS12_2	151.915	818.172	1.66755	-2.66689	397.882	-0.0849269	398.297	0.00164267	18.1826	0.0456509		10.5806	1.92226	-90.1166	-393.992	NA	NA	10.5806	1.92226	NA
JG-MDS12_7	209.722	1117.22	1.43163	21.7417	192.717	0.0104805	193.568	0.00165263	18.136	0.0936929		10.6447	1.92893	10.5863	20.388	-2.64918	0	10.6447	1.92893	NA
JG-MDS12_38	261.468	1166.43	1.44919	3.98461	470.988	0.0571911	471.124	0.00165277	11.2903	0.0239647		10.6457	1.20094	56.471	264.618	3190.86	56.6562	10.6457	1.20094	NA
JG-MDS12_120	232.031	1692.72	1.15995	8.56021	75.8334	0.0266889	76.3977	0.00165697	9.26844	0.121318		10.6726	0.98837	26.7441	20.1678	1908.11	1685.56	10.6726	0.98837	NA
JG-MDS12_88	157.876	1516.42	1.7179	19.1286	69.9709	0.0121332	71.3763	0.00168328	14.0943	0.197465		10.842	1.52682	12.2457	8.68827	297.582	1840.16	10.842	1.52682	NA
JG-MDS12_95	208.003	2466.87	1.35596	13.8275	112.818	0.0169093	113.329	0.00169578	10.7442	0.0948054		10.9225	1.17254	17.0259	19.1367	994.941	395.743	10.9225	1.17254	NA
JG-MDS12_104	396.99	2983.2	0.970118	12.9437	332.385	0.0182012	332.412	0.00170866	4.30183	0.0129412		11.0053	0.473027	18.315	60.4067	1127.87	1582.23	11.0053	0.473027	NA
JG-MDS12_62	258.826	2431.88	1.22178	19.3542	35.9529	0.0121738	38.2296	0.00170884	12.9957	0.339938		11.0065	1.42914	12.2864	4.66878	270.735	849.185	11.0065	1.42914	NA
JG-MDS12_11	221.879	1211.28	1.39139	-4.2977	456.885	-0.0549779	457.139	0.00171365	15.221	0.0332962		11.0375	1.67857	-57.4168	-276.688	NA	NA	11.0375	1.67857	NA
JG-MDS12_3	219.031	1591.48	1.53719	-13.3915	218.171	-0.0176835	218.563	0.0017175	13.0864	0.0598745		11.0622	1.4464	-18.1161	-39.9712	NA	NA	11.0622	1.4464	NA
JG-MDS12_81	738.617	4869.07	0.414635	25.5932	24.2485	0.00927581	27.5954	0.00172177	13.1724	0.477343		11.0897	1.45953	9.37509	2.57519	-411.865	641.641	11.0897	1.45953	NA
JG-MDS12_49	140.332	735.308	1.37509	4.51229	134.959	0.0527035	135.708	0.00172478	14.2338	0.104885		11.1091	1.57988	52.1517	69.0936	2992.46	757.272	11.1091	1.57988	NA
JG-MDS12_80	104.8	531.799	2.00562	5.8312	102.579	0.0408687	104.872	0.00172841	21.8099	0.207967		11.1325	2.42589	40.6718	41.8341	2572.24	653.802	11.1325	2.42589	NA
JG-MDS12_79	1050.92	1347.77	0.922041	19.2079	34.9037	0.0124538	35.0814	0.00173492	3.52681	0.100532		11.1743	0.393756	12.5673	4.38163	288.152	820.374	11.1743	0.393756	NA
JG-MDS12_43	193.556	856.894	0.904507	6.67385	156.725	0.0358675	156.956	0.00173611	8.51888	0.0542755		11.182	0.951752	35.7813	55.2375	2344.07	271.743	11.182	0.951752	NA
JG-MDS12_13	204.795	850.926	1.5098	5.56582	270.746	0.0430807	271.021	0.00173904	12.2197	0.0450877		11.2009	1.36753	42.8274	114.136	2649.79	60.9353	11.2009	1.36753	NA
JG-MDS12_91	165.918	916.892	1.82261	8.56946	162.783	0.027989	164.571	0.00173956	24.1909	0.146994		11.2042	2.70804	28.0291	45.5274	1906.17	44.03	11.2042	2.70804	NA
JG-MDS12_86.2	180.314	548.167	1.50432	6.70447	272.142	0.0358077	273.096	0.00174116	22.8047	0.0835042		11.2145	2.5552	35.7227	96.1473	2336.24	172.889	11.2145	2.5552	NA
JG-MDS12_15	156.758	627.588	1.52799	11.9437	196.04	0.0205068	197.05	0.00177638	19.9192	0.101087		11.4411	2.27695	20.6116	40.2267	1286.18	671.955	11.4411	2.27695	NA
JG-MDS12_106	103.788	320.563	1.42651	2.49987	276.041	0.0980026	277.263	0.00177686	25.9988	0.0937695		11.4442	2.97272	94.9309	256.606	3909.16	869.11	11.4442	2.97272	NA
JG-MDS12_28	154.81	2487.98	1.41383	7.08673	49.7456	0.0349304	53.3108	0.00179535	19.1681	0.359554		11.5632	2.21446	34.8624	18.2719	2240.84	927.278	11.5632	2.21446	NA
JG-MDS12_45	99.9252	1162.19	1.90757	1.49323	616.882	0.166325	617.473	0.00180129	26.9925	0.0437145		11.6014	3.12869	156.225	1399.43	NA	NA	11.6014	3.12869	NA
JG-MDS12_16	202.6	1360.47	1.49388	4.61477	292.663	0.0541802	293.35	0.00181338	20.0678	0.068409		11.6792	2.34164	53.5751	154.264	2956.29	209.875	11.6792	2.34164	NA
JG-MDS12_32	152.5	197.353	1.57114	13.5136	36.4365	0.0186734	40.4512	0.00183017	17.5694	0.434335		11.7873	2.06906	18.7858	7.52936	1041.44	760.512	11.7873	2.06906	NA
JG-MDS12_29	183.349	1512.95	1.12921	6.32995	461.271	0.0399557	461.474	0.00183433	13.6943	0.029675		11.814	1.61636	39.7808	181.951	2434.13	679.654	11.814	1.61636	NA
JG-MDS12_94	310.557	89.1125	1.31138	67.3225	233.196	0.00413758	233.393	0.00202025	9.58257	0.0410576		13.0102	1.24546	4.19256	9.76528	0	0	13.0102	1.24546	NA
JG-MDS12_61	144.173	1489.54	1.29872	-2.2836	654.412	-0.125439	655.117	0.00207755	30.4007	0.0464049		13.3788	4.06304	-136.095	-1761.63	NA	NA	13.3788	4.06304	NA
JG-MDS12_72	170.018	3135.49	2.69563	8.52568	98.1059	0.0397432	98.3192	0.00245749	6.47258	0.0658323		15.8225	1.02287	39.5733	38.1777	1915.36	#VALUE!	15.8225	1.02287	NA
JG-MDS12_27	320.915	4036.37	1.55315	21.6806	36.5966	0.0231489	37.397	0.00363999	7.69578	0.205786		23.4223	1.79926	23.2371	8.5915	4.1409	908.199	23.4223	1.79926	NA
JG-MDS12_51	577.942	7471.48	0.918777	24.6447	21.2384	0.0210237	21.4141	0.00375777	2.73785	0.127853		24.1787	0.660738	21.1258	4.47719	-314.103	549.45	24.1787	0.660738	NA
JG-MDS12_64	208.336	7970.63	0.587298	24.4402	38.1467	0.0215518	38.5931	0.0038202	5.85309	0.151662		24.5797	1.43593	21.6508	8.26745	-292.796	1004.79	24.5797	1.43593	NA
JG-MDS12_77	874.362	1263.73	1.9683	21.1067	13.9677	0.0273411	14.1252	0.00418538	2.10372	0.148934		26.9244	0.565233	27.389	3.81705	68.3172	333.726	26.9244	0.565233	NA
JG-MDS12_19	153.458	2273.47	0.628929	20.2185	50.3037	0.0291705	50.9024	0.00427751	7.78422	0.152924		27.5158	2.13732	29.1954	14.6506	169.655	1249.32	27.5158	2.13732	NA
JG-MDS12_36	303.775	3351.58	1.48701	22.6044	28.5381	0.0274529	28.9186	0.0045007	4.67549	0.161678		28.9483	1.35044	27.4995	7.8459	-97.3362	713.206	28.9483	1.35044	NA
JG-MDS12_99	140.757	8250.25	1.26755	25.3842	25.5255	0.0640668	25.6939	0.0117949	2.93626	0.114278		75.5899	2.20655	63.0534	15.7093	-390.472	673.41	75.5899	2.20655	NA
JG-MDS12_52	204.854	12085.5	1.29796	20.6173	11.7055	0.0971412	12.4908	0.0145256	4.35907	0.348983		92.9642	4.0233	94.134	11.23	123.856	276.453	92.9642	4.0233	NA
JG-MDS12_50	245.996	13195.9	1.04251	21.0719	12.1156	0.0951533	12.8584	0.0145421	4.30683	0.334944		93.069	3.97953	92.2926	11.3444	72.2679	288.961	93.069	3.97953	NA
JG-MDS12_6	382.347	17673.3	1.57926	21.992	7.72815	0.0917185	7.8473	0.0146292	1.36231	0.173602		93.6227	1.26621	89.103	6.69427	-30.3216	187.579	93.6227	1.26621	NA
JG-MDS12_69	275.674	9387.15	1.23612	21.7026	11.0752	0.093529	11.2068	0.0147217	1.71242	0.152802		94.2102	1.60155	90.7855	9.73285	1.64403	267.565	94.2102	1.60155	NA
JG-MDS12_98	130.426	5944.94	1.72296	19.1602	15.9584	0.105979	16.1063	0.0147271	2.17781	0.135215		94.245	2.03754	102.281	15.6723	293.8	366.387	94.245	2.03754	NA
JG-MDS12_116	221.944	10368.7	1.3488	21.2711	9.74999	0.0955459	10.093	0.0147401	2.60879	0.258476		94.3275	2.44289	92.6566	8.93803	49.8648	233.271	94.3275	2.44289	NA
JG-MDS12_35	68.7776	3405.77	2.19537	17.7497	47.5613	0.116	48.0567	0.014933	6.88307	0.143228		95.5529	6.52847	111.439	50.7622	465.73	1114.53	95.5529	6.52847	NA
JG-MDS12_42	283.571	14956.8	1.29368	20.3043	9.01714	0.102119	9.07839	0.0150381	1.05278	0.115965		96.2201	1.00546	98.7302	8.54134	159.757	211.296	96.2201	1.00546	NA
JG-MDS12_21	389.636	16971.1	2.84447	22.1175	6.47157	0.0937537	6.52656	0.0150391	0.845438	0.129538		96.2267	0.807495	90.9941	5.68052	-44.1327	157.44	96.2267	0.807495	NA
JG-MDS12_55	250.855	13000.3	1.44483	22.6732	13.966	0.091643	14.028	0.0150699	1.31712	0.0938922		96.4221	1.26054	89.0327	11.9581	-104.806	344.879	96.4221	1.26054	NA
JG-MDS12_58	199.682	9594.37	2.10867	25.2926	10.2312	0.0823928	10.2715	0.0151141	0.908733	0.0884713		96.7025	0.872209	80.3921	7.9392	-381.072	266.377	96.7025	0.872209	NA
JG-MDS12_37	202.005	10379	1.77462	23.4619	15.0425	0.0896212	15.1092	0.0152501	1.41846	0.0938806		97.5666	1.37352	87.1505	12.6191	-189.606	377.883	97.5666	1.37352	NA
JG-MDS12_22	128.741	4791.09	1.60981	18.7355	16.5601	0.113245	16.9358	0.0153881	3.54731	0.209457		98.4423	3.46553	108.93	17.4947	344.778	376.935	98.4423	3.46553	NA
JG-MDS12_63	207.635	8049.75	2.48144	22.2362	10.3633	0.0954421	10.5375	0.0153921	1.90789	0.181058		98.4682	1.86439	92.5603	9.32244	-57.1606	253.106	98.4682	1.86439	NA
JG-MDS12_107	638.87	21062.4	1.65425	21.1259	2.62826	0.10092	3.25318	0.0154629	1.91715	0.589314		98.9177	1.88192	97.6254	3.02804	66.1881	62.5752	98.9177	1.88192	NA
JG-MDS12_18	101.726	5244.91	1.69009	24.3669	26.2125	0.0875512	26.6529	0.0154725	4.8252	0.181039		98.9785	4.73943	85.2197	21.7898	-285.134	677.607	98.9785	4.73943	NA
JG-MDS12_111	175.681	6359.89	1.40126	23.5465	17.7701	0.0914801	17.9505	0.0156225	2.53877	0.141432		99.9307	2.51745	88.8812	15.2774	-198.606	448.023	99.9307	2.51745	NA
JG-MDS12_54	177.058	4786.46	1.50896	22.5424	12.8676	0.095733	13.1146	0.0156517	2.5333	0.193166		100.116	2.51664	92.8299	11.6349	-90.6012	316.676	100.116	2.51664	NA
JG-MDS12_68	168.122	2009.03	1.35028	22.9893	18.006	0.094393	18.308	0.0157385	3.3113	0.180867		100.667	3.3075	91.5874	16.0351	-138.974	448.82	100.667	3.3075	NA
JG-MDS12_117	378.098	25906.2	1.54231	22.0394	4.46521	0.0986141	4.60866	0.0157629	1.14091	0.247557		100.822	1.14134	95.4962	4.2005	-35.5452	108.402	100.822	1.14134	NA
JG-MDS12_60	180.732	6936.74	1.05943	19.681	13.0117	0.110645	14.9879	0.0157935	7.43866	0.496311		101.016	7.45566	106.556	15.1621	232.222	301.492	101.016	7.45566	NA
JG-MDS12_73	116.815	6856.79	1.40252	27.4701	31.0162	0.0799093	31.3329	0.0159205	4.44312	0.141804		101.822	4.48852	78.0597	23.546	-600.517	860.006	101.822	4.48852	NA
JG-MDS12_20	48.8089	6480.91	2.23424	19.6859	40.0983	0.112636	40.3453	0.0160817	4.45742	0.110482		102.844	4.54783	108.374	41.4943	231.645	961.172	102.844	4.54783	NA
JG-MDS12_67	60.3671	1992.48	1.60991	24.5853	25.878	0.0913404	26.2731	0.0162868	4.53943	0.172779		104.146	4.68965	88.7513	22.3313	-307.923	671.746	104.146	4.68965	NA
JG-MDS12_78	67.3813	6693.41	1.44609	24.7796	35.0978	0.0916	35.2738	0.0164622	3.51967	0.0997815		105.258	3.67466	88.9927	30.0636	-328.115	926.171	105.258	3.67466	NA
JG-MDS12_59	722.911	55304.6	0.972668	20.6086	4.58335	0.110165	4.59858	0.0164661	0.373978	0.0813246		105.283	0.390536	106.116	4.63354	124.849	107.967	105.283	0.390536	NA
JG-MDS12_53	79.6736	3252.41	1.00739	27.6662	44.6253	0.0827352	44.8438	0.0166012	4.42144	0.0985965		106.139	4.65447	80.7132	34.8073	-619.901	1271.55	106.139	4.65447	NA
JG-MDS12_87	65.2783	6073.6	1.72802	21.9113	29.2858	0.105146	30.1148	0.0167094	7.0174	0.233022		106.825	7.4346	101.515	29.1006	-21.4229	722.117	106.825	7.4346	NA
JG-MDS12_115	519.557	28332.5	1.50594	21.8658	4.48329	0.106672	4.70063	0.0169166	1.41281	0.300558		108.139	1.51506	102.916	4.60064	-16.3937	108.428	108.139	1.51506	NA
JG-MDS12_74	221.726	15276.1	1.15318	21.8343	9.42441	0.111743	9.57041	0.0176953	1.66532	0.174007		113.074	1.86662	107.558	9.76763	-12.9084	228.135	113.074	1.86662	NA
JG-MDS12_14	82.255	3499.99	1.48159	24.7504	36.4632	0.0988252	36.5989	0.0177398	3.14858	0.0860294		113.355	3.53789	95.6913	33.4345	-325.087	963.791	113.355	3.53789	NA
JG-MDS12_101	92.3474	13078.5	1.39234	29.0516	18.0323	0.0851071	18.42	0.0179323	3.75926	0.204085		114.575	4.26911	82.9352	14.6705	-755.221	509.919	114.575	4.26911	NA
JG-MDS12_56	114.302	5978.17	1.21176	21.8841	17.3919	0.113065	17.4764	0.0179455	1.717	0.0982466		114.658	1.95128	108.765	18.0275	-18.4107	423.373	114.658	1.95128	NA
JG-MDS12_119	249.756	9717.8	0.962259	21.8567	11.6672	0.113394	11.8172	0.0179751	1.87724	0.158857		114.846	2.13685	109.065	12.221	-15.3808	282.862	114.846	2.13685	NA
JG-MDS12_82	92.2388	7298.09	1.61063	22.1494	16.0608	0.111979	16.2786	0.0179887	2.654	0.163036		114.932	3.02326	107.774	16.6466	-47.6453	392.776	114.932	3.02326	NA
JG-MDS12_108	117.903	4895.21	2.01442	24.0623	20.8581	0.103202	21.1432	0.0180105	3.46044	0.163667		115.07	3.9466	99.728	20.0859	-253.184	532.909	115.07	3.9466	NA
JG-MDS12_89	261.625	14047.7	1.87993	20.2263	6.09957	0.123149	6.24171	0.0180652	1.32446	0.212194		115.417	1.51504	117.923	6.94916	168.76	142.575	115.417	1.51504	NA
JG-MDS12_71	84.8781	4623.92	1.0628	42.4806	70.232	0.0588542	70.3112	0.0181329	3.33586	0.0474442		115.845	3.82991	58.0671	39.7024	NA	NA	115.845	3.82991	NA
JG-MDS12_24	115.953	6777.63	1.49477	23.6003	17.0345	0.10695	17.344	0.0183061	3.2619	0.188071		116.942	3.78013	103.171	17.0165	-204.332	429.743	116.942	3.78013	NA
JG-MDS12_113	155.973	14133.3	1.21374	22.0408	16.3742	0.115856	16.5089	0.0185201	2.10461	0.127483		118.296	2.46697	111.308	17.4061	-35.696	399.618	118.296	2.46697	NA
JG-MDS12_12	247.89	13877	1.66411	19.7753	5.14318	0.131393	5.35465	0.0188449	1.48994	0.278253		120.352	1.77654	125.349	6.31431	221.175	119.042	120.352	1.77654	NA
JG-MDS12_65	227.332	5886.63	1.59733	18.4226	16.143	0.143618	16.4043	0.0191892	2.91611	0.177765		122.53	3.53936	136.261	20.9207	382.713	364.907	122.53	3.53936	NA
JG-MDS12_70	50.2018	3035.66	1.1936	13.376	72.2124	0.208442	72.4022	0.0202214	5.23936	0.0723646		129.055	6.69442	192.244	127.472	1062.09	1722.18	129.055	6.69442	NA
JG-MDS12_5	60.0374	5236.93	1.29842	23.3988	26.2157	0.123118	26.627	0.0208936	4.66164	0.175072		133.301	6.15022	117.895	29.6464	-182.872	664.227	133.301	6.15022	NA
JG-MDS12_17	58.7494	3846.2	1.32332	27.935	40.8876	0.105635	41.8003	0.0214021	8.68734	0.20783		136.511	11.7345	101.965	40.573	-646.365	1162.75	136.511	11.7345	NA
JG-MDS12_1	37.901	2368.85	2.06933	11.3244	347.68	0.265337	347.727	0.0217928	5.76749	0.0165862		138.976	7.92966	238.959	941.218	1389.11	1348.4	138.976	7.92966	NA
JG-MDS12_34	30.5285	2073.93	1.92121	34.263	102.684	0.090984	102.891	0.0226094	6.52097	0.0633776		144.126	9.29414	88.4196	87.3418	-1244.21	0	144.126	9.29414	NA
JG-MDS12_33	162.326	6904.3	1.09503	21.2436	10.3549	0.148676	10.7884	0.022907	3.02744	0.28062		146.002	4.37043	140.742	14.1794	52.9372	247.661	146.002	4.37043	NA
JG-MDS12_96	52.304	4288.61	1.73597	18.7894	28.595	0.168677	29.0245	0.0229862	4.97467	0.171396		146.501	7.20576	158.27	42.5608	338.232	659.843	146.501	7.20576	NA
JG-MDS12_103	94.3798	6317.2	0.948092	22.2677	16.6401	0.144349	16.9557	0.0233124	3.25652	0.19206		148.556	4.78246	136.91	21.7204	-60.6149	408.12	148.556	4.78246	NA
JG-MDS12_39	1385.36	47534.4	0.444439	20.3382	1.42837	0.158368	1.46154	0.0233604	0.309571	0.211812		148.859	0.455543	149.274	2.0289	155.892	33.4287	148.859	0.455543	NA
JG-MDS12_105	266.16	4176.56	1.53173	19.813	9.34534	0.16626	9.9052	0.0238911	3.28294	0.331436		152.201	4.93814	156.168	14.3388	216.776	216.761	152.201	4.93814	NA
JG-MDS12_8	318.585	32246.4	1.30519	20.464	8.141	0.169033	8.1715	0.0250878	0.705392	0.0863235		159.731	1.11289	158.58	11.9977	141.412	191.37	159.731	1.11289	NA
JG-MDS12_25	103.837	4865.71	1.81416	22.0585	13.8647	0.160413	14.4255	0.0256634	3.9829	0.276102		163.349	6.42431	151.064	20.2509	-37.6482	337.962	163.349	6.42431	NA
JG-MDS12_23	119.786	13751.9	1.84215	19.3028	8.97533	0.183706	9.3063	0.0257183	2.4598	0.264315		163.695	3.97587	171.245	14.6662	276.879	205.929	163.695	3.97587	NA
JG-MDS12_66	71.4573	7098.55	1.51642	24.6371	32.2753	0.144004	32.4284	0.0257315	3.14819	0.0970813		163.777	5.09109	136.604	41.471	-313.323	845.568	163.777	5.09109	NA
JG-MDS12_110	383.526	20884.8	2.8345	20.5628	4.19637	0.174984	4.65098	0.0260962	2.00552	0.431204		166.069	3.28802	163.735	7.0331	130.083	98.7308	166.069	3.28802	NA
JG-MDS12_100	355.631	24580.8	1.46154	20.586	6.22958	0.176675	6.27233	0.0263782	0.731043	0.11655		167.841	1.21115	165.195	9.5629	127.473	146.731	167.841	1.21115	NA
JG-MDS12_97	147.845	17533.7	1.92445	20.9047	11.4852	0.175279	11.5679	0.0265749	1.38021	0.119314		169.076	2.30326	163.99	17.5192	91.1512	272.873	169.076	2.30326	NA
JG-MDS12_30	162.209	9399.82	2.26035	20.5414	7.42569	0.181142	8.03182	0.0269866	3.06093	0.3811		171.661	5.18507	169.043	12.5079	132.533	174.788	171.661	5.18507	NA
JG-MDS12_74	214.522	11295.7	1.08456	20.0584	6.60531	0.189747	6.64084	0.0276039	0.685974	0.103296		175.534	1.18787	176.414	10.7545	188.191	153.873	175.534	1.18787	NA
JG-MDS12_92	71.5464	15179.9	1.18295	17.6018	4.74673	0.619253	5.34352	0.0790541	2.45394	0.459236		490.474	11.5895	489.379	20.7525	484.275	104.875	490.474	11.5895	101.28
JG-MDS12_76	63.4265	11284.9	1.28313	17.4898	5.38484	0.69323	5.70361	0.0879349	1.88007	0.329628		543.312	9.79604	534.739	23.7148	498.311	118.691	543.312	9.79604	109.031
JG-MDS12_40	516.369	393196	4.52417	11.4012	0.281784	2.81761	0.338634	0.232986	0.187805	0.554595		1350.13	2.28769	1360.23	2.53776	1376.13	5.41786	1376.13	5.41786	98.1107
JG-MDS12_84	34.2705	27425.9	1.19056	11.2642	1.9896	3.0332	2.16594	0.247799	0.856035	0.395225		1427.12	10.9589	1416.01	16.5412	1399.33	38.1379	1399.33	38.1379	101.985
JG-MDS12_31	81.2632	113493	3.09119	9.18816	0.428579	4.84675	0.555433	0.322981	0.353307	0.636093		1804.27	5.56025	1793.05	4.67521	1780	7.81546	1780	7.81546	101.364
JG-MDS13
JG-MDS13_22	171.295	1942.59	3.65926	6.42013	154.941	0.0315509	157.174	0.00146911	26.4009	0.167972		9.46356	2.49664	31.5413	48.8504	2410.13	321.326	9.46356	2.49664	NA
JG-MDS13_16	133.674	1197.77	3.91436	4.31375	147.163	0.0477261	148.362	0.00149317	18.8214	0.126861		9.61843	1.80897	47.3394	68.7264	3064.62	751.945	9.61843	1.80897	NA
JG-MDS13_9	126.288	508.979	2.02623	12.1122	147.314	0.0170367	148.67	0.0014966	20.0369	0.134774		9.64048	1.93021	17.1531	25.2925	1258.89	421.036	9.64048	1.93021	NA
JG-MDS13_43	283.155	960.946	3.55099	-3.52251	702.302	-0.0591042	702.4	0.00150997	11.696	0.0166515		9.72657	1.13676	-61.8601	-481.04	NA	NA	9.72657	1.13676	NA
JG-MDS13_12	186.714	2438.96	3.82491	7.27145	25.782	0.0290526	36.233	0.00153216	25.4582	0.702624		9.86941	2.51065	29.0792	10.3872	2196.24	456.25	9.86941	2.51065	NA
JG-MDS13_80	314.113	1556.57	3.08511	17.2428	46.9748	0.0123832	49.002	0.00154861	13.9486	0.284654		9.97524	1.39033	12.4965	6.08608	529.597	1087.59	9.97524	1.39033	NA
JG-MDS13_110	438.118	2330.79	5.64759	19.3705	35.2874	0.0111985	40.2556	0.00157326	19.3728	0.481246		10.1339	1.96169	11.3076	4.52671	268.806	832.785	10.1339	1.96169	NA
JG-MDS13_40	263.358	3239.66	3.6452	21.4504	69.2963	0.010204	75.5446	0.00158747	30.0832	0.398217		10.2254	3.07368	10.3085	7.74826	29.7828	1898.51	10.2254	3.07368	NA
JG-MDS13_65	85.1562	226.276	1.60412	2.4675	246.28	0.0888654	249.829	0.00159034	41.9607	0.167958		10.2438	4.29497	86.4459	209.972	3928.74	955.705	10.2438	4.29497	NA
JG-MDS13_46	308.801	1565.04	3.11132	13.9203	62.4085	0.0157847	65.8277	0.00159361	20.9396	0.318097		10.2649	2.14772	15.9023	10.3869	981.361	1424.67	10.2649	2.14772	NA
JG-MDS13_30	461.732	2632.56	5.30808	11.4829	36.6818	0.0192117	38.8386	0.00159998	12.7627	0.328607		10.3059	1.31426	19.3222	7.43365	1362.38	732.109	10.3059	1.31426	NA
JG-MDS13_74	543.98	2639.91	8.1825	21.3096	29.478	0.0103921	30.5322	0.00160612	7.95351	0.260496		10.3454	0.822161	10.4975	3.18862	45.5401	718.005	10.3454	0.822161	NA
JG-MDS13_27	221.92	1115.52	3.59522	10.8082	119.006	0.0206274	120.135	0.00161694	16.434	0.136796		10.4151	1.71023	20.7316	24.6582	1478.11	105.895	10.4151	1.71023	NA
JG-MDS13_101	492.827	5681.77	6.03053	18.2703	41.5475	0.0122145	41.9561	0.00161853	5.84161	0.139231		10.4253	0.608512	12.3273	5.14084	401.342	969.986	10.4253	0.608512	NA
JG-MDS13_72	741.414	4034.46	4.33046	26.3199	43.1884	0.00848995	43.3764	0.00162064	4.03432	0.0930073		10.4389	0.420797	8.58417	3.70782	-485.616	1193.68	10.4389	0.420797	NA
JG-MDS13_36	489.364	1594.87	5.44223	49.817	76.6796	0.00450511	76.9784	0.00162773	6.77626	0.0880281		10.4845	0.709879	4.56414	3.50553	NA	NA	10.4845	0.709879	NA
JG-MDS13_29	188.966	628.43	2.283	8.42046	104.952	0.0266851	105.266	0.00162969	8.11815	0.0771206		10.4971	0.851475	26.7404	27.788	1937.61	263.841	10.4971	0.851475	NA
JG-MDS13_95	438.832	1476.3	2.63547	12.764	46.6957	0.017642	47.2856	0.00163318	7.44588	0.157466		10.5195	0.782634	17.7572	8.32377	1155.62	982.466	10.5195	0.782634	NA
JG-MDS13_76	227.241	1314.66	3.35801	10.789	138.699	0.020875	140.792	0.00163346	24.1911	0.171821		10.5214	2.54316	20.9779	29.2404	1481.48	214.097	10.5214	2.54316	NA
JG-MDS13_42	658.401	2636.28	5.54914	11.5974	420.676	0.0194694	420.715	0.00163761	5.74474	0.0136547		10.5481	0.605464	19.5789	81.7586	1343.25	0	10.5481	0.605464	NA
JG-MDS13_98	620.319	4919.78	5.38516	20.3384	57.3508	0.0111063	58.0096	0.00163827	8.71781	0.150282		10.5523	0.91918	11.215	6.47007	155.829	1459.89	10.5523	0.91918	NA
JG-MDS13_77	268.213	1096.08	3.15031	13.5251	37.836	0.0167329	41.7621	0.00164138	17.678	0.423302		10.5724	1.86745	16.8498	6.97886	1039.72	792.155	10.5724	1.86745	NA
JG-MDS13_55	538.702	2550.96	7.37675	28.5234	42.0125	0.0079421	42.5682	0.00164299	6.85566	0.161051		10.5827	0.724919	8.03242	3.40578	-703.942	1211.82	10.5827	0.724919	NA
JG-MDS13_23	247.323	810.17	3.31656	2.85112	500.72	0.0795054	501.008	0.00164404	16.9745	0.0338807		10.5894	1.79603	77.6798	393.212	3710.2	272.143	10.5894	1.79603	NA
JG-MDS13_24	198.341	529.09	1.43146	6.94192	190.606	0.0326922	191.172	0.00164597	14.6954	0.0768699		10.6019	1.55671	32.6641	61.526	2276.47	87.4194	10.6019	1.55671	NA
JG-MDS13_115	472.371	3968.07	4.81274	29.5257	78.1855	0.00772626	78.633	0.0016545	8.37729	0.106537		10.6568	0.892014	7.81496	6.12162	-800.924	2635.11	10.6568	0.892014	NA
JG-MDS13_21	313.468	1503.54	3.08698	14.64	55.5488	0.0156314	57.1256	0.00165973	13.3292	0.233332		10.6905	1.42377	15.7491	8.9276	877.872	1251.33	10.6905	1.42377	NA
JG-MDS13_81	519.89	3598.19	3.97036	24.2522	48.3068	0.00944014	49.5857	0.00166046	11.1888	0.225647		10.6951	1.19567	9.5404	4.70855	-273.128	1295.11	10.6951	1.19567	NA
JG-MDS13_68	713.648	471.234	4.079	24.0277	31.7559	0.00952924	32.0771	0.00166061	4.52792	0.141158		10.6961	0.483911	9.63001	3.07443	-249.539	820.963	10.6961	0.483911	NA
JG-MDS13_14	895.986	7935.2	1.13908	33.1253	29.5045	0.00692641	29.9299	0.00166405	5.02813	0.167997		10.7182	0.538479	7.00871	2.09048	NA	NA	10.7182	0.538479	NA
JG-MDS13_31	255.481	1689.41	2.97324	20.6865	96.3151	0.01116	97.273	0.00167436	13.6174	0.139991		10.7846	1.46735	11.2689	10.9014	115.99	906.381	10.7846	1.46735	NA
JG-MDS13_94	204.971	473.529	3.76789	10.2136	142.141	0.0226588	144.051	0.00167847	23.3817	0.162315		10.811	2.52569	22.7506	32.4191	1584.66	161.549	10.811	2.52569	NA
JG-MDS13_104	79.6959	293.003	1.48611	3.26092	203.855	0.0710299	207.012	0.00167989	36.0141	0.173971		10.8202	3.89352	69.6763	140.287	3504.2	820.575	10.8202	3.89352	NA
JG-MDS13_3	738.964	4643.97	4.63579	19.1587	27.3194	0.0121235	27.5511	0.00168458	3.56604	0.129433		10.8504	0.386603	12.2359	3.35092	293.999	634.261	10.8504	0.386603	NA
JG-MDS13_15	173.793	637.63	3.50549	3.92992	221.593	0.0592838	222.076	0.00168973	14.6488	0.0659628		10.8835	1.59296	58.479	126.855	3212.71	587.633	10.8835	1.59296	NA
JG-MDS13_1	190.323	1214.25	3.50395	16.6037	160.816	0.0142252	161.829	0.00171303	18.0837	0.111746		11.0334	1.99354	14.3423	23.0508	611.733	1024.76	11.0334	1.99354	NA
JG-MDS13_7	351.995	168.9	3.01824	42.4902	57.0314	0.00556656	57.5521	0.00171543	7.72442	0.134216		11.0489	0.852735	5.63651	3.23496	-1978.07	201.456	11.0489	0.852735	NA
JG-MDS13_26	757.201	3738.54	7.00923	44.2607	106.359	0.00534435	106.437	0.00171558	4.06638	0.0382045		11.0499	0.448945	5.41211	5.74523	NA	NA	11.0499	0.448945	NA
JG-MDS13_97	186.604	895.291	3.78649	12.1338	80.3195	0.0196512	82.5048	0.00172936	18.8636	0.228636		11.1385	2.09931	19.76	16.1467	1255.37	1997.88	11.1385	2.09931	NA
JG-MDS13_48	156.875	613.928	1.84	-0.422589	3453.4	-0.567373	3453.46	0.00173895	19.3833	0.00561273		11.2002	2.16909	-850.769	#NUM!	NA	NA	11.2002	2.16909	NA
JG-MDS13_18	89.5299	331.767	1.95558	4.75291	163.899	0.0504587	167.683	0.00173938	35.4211	0.211238		11.203	3.96479	49.9842	81.963	2908.6	595.12	11.203	3.96479	NA
JG-MDS13_61	128.93	779.341	4.19917	6.82762	143.182	0.0363461	145.931	0.0017998	28.1879	0.19316		11.5919	3.26456	36.2503	52.0126	2305.03	305.878	11.5919	3.26456	NA
JG-MDS13_100	544.673	1680.9	3.77006	15.0934	18.1113	0.0164838	24.0439	0.00180444	15.8142	0.657721		11.6217	1.83622	16.6009	3.95907	814.435	381.554	11.6217	1.83622	NA
JG-MDS13_64	125.034	1255.24	1.42205	6.10214	185.675	0.0417651	186.422	0.00184839	16.6767	0.0894568		11.9045	1.98345	41.5459	76.0294	2496.05	252.787	11.9045	1.98345	NA
JG-MDS13_116	171.155	1069.01	1.53151	1.17961	1531	0.226684	1531.06	0.00193935	12.8848	0.00841561		12.4898	1.60772	207.458	#NUM!	NA	NA	12.4898	1.60772	NA
JG-MDS13_13	82.4872	602.074	1.39995	3.42659	346.593	0.0848116	347.917	0.00210773	30.3183	0.0871425		13.573	4.11079	82.6586	283.319	3427.41	392.755	13.573	4.11079	NA
JG-MDS13_103	150.992	847.395	1.36344	5.14609	157.956	0.0579266	159.036	0.00216199	18.5015	0.116336		13.922	2.57301	57.1772	88.6439	2779.08	538.672	13.922	2.57301	NA
JG-MDS13_108	218.018	2234.6	0.8579	29.0947	70.4989	0.0176132	71.5634	0.00371664	12.2972	0.171837		23.9146	2.93538	17.7284	12.5776	-759.385	2252.12	23.9146	2.93538	NA
JG-MDS13_44	319.029	1755.93	3.22606	23.3615	46.669	0.0229806	47.0842	0.0038937	6.23906	0.132509		25.0516	1.55995	23.0701	10.7403	-178.893	1223.89	25.0516	1.55995	NA
JG-MDS13_117	123.239	1421.69	1.49353	6.77577	244.017	0.0851702	244.274	0.00418548	11.1916	0.0458159		26.925	3.00706	82.9942	197.108	2318.11	86.6834	26.925	3.00706	NA
JG-MDS13_86	122.722	2668.01	1.70757	24.4265	50.8816	0.0396722	51.2503	0.00702823	6.1367	0.11974		45.1484	2.76094	39.504	19.8597	-291.363	1378.14	45.1484	2.76094	NA
JG-MDS13_45	61.8043	1976.47	2.18905	20.6041	114.648	0.0786896	115.019	0.011759	9.23277	0.0802718		75.3612	6.91742	76.9122	85.3969	125.355	1065.09	75.3612	6.91742	NA
JG-MDS13_54	878.095	21228.1	4.53119	21.6731	4.09493	0.0785191	4.15858	0.0123423	0.724775	0.174284		79.0764	0.569626	76.7517	3.07414	4.92418	98.6443	79.0764	0.569626	NA
JG-MDS13_33	114.057	13677.2	2.18025	21.4257	28.8309	0.0868374	28.9874	0.013494	3.0076	0.103755		86.4063	2.58142	84.553	23.5212	32.5355	703.323	86.4063	2.58142	NA
JG-MDS13_51	163.766	8511.59	1.67476	22.4628	21.651	0.0917322	21.7727	0.0149446	2.29861	0.105573		95.6263	2.18185	89.1157	18.5779	-81.9309	535.423	95.6263	2.18185	NA
JG-MDS13_83	282.541	16693.8	1.79973	21.3761	12.9149	0.0975392	13.0436	0.0151219	1.8274	0.1401		96.7522	1.75485	94.5023	11.7708	38.0514	310.141	96.7522	1.75485	NA
JG-MDS13_104	372.767	9556.26	1.87756	21.2065	5.19845	0.0997359	5.49403	0.0153398	1.77777	0.323582		98.1357	1.73141	96.5325	5.05927	57.0825	124.008	98.1357	1.73141	NA
JG-MDS13_6	141.558	9109.68	1.34104	22.866	21.2519	0.0929215	21.4722	0.0154101	3.06804	0.142884		98.582	3.00152	90.2213	18.5388	-125.67	529.781	98.582	3.00152	NA
JG-MDS13_53	350.037	31283	1.61126	21.3783	9.7595	0.101638	9.80187	0.015759	0.910395	0.0928797		100.797	0.910513	98.2875	9.18267	37.8086	234.036	100.797	0.910513	NA
JG-MDS13_93	197.23	7493.46	1.60893	22.6958	9.42391	0.0961393	10.0592	0.015825	3.51815	0.349744		101.216	3.53312	93.2064	8.95859	-107.256	232.309	101.216	3.53312	NA
JG-MDS13_92	174.728	13540.1	1.21702	21.6349	14.7968	0.101018	15.4247	0.0158509	4.35606	0.282408		101.38	4.38162	97.7155	14.3707	9.16806	357.676	101.38	4.38162	NA
JG-MDS13_11	418.091	16424.5	0.759382	21.1817	5.60949	0.103545	6.68284	0.0159069	3.63234	0.543532		101.736	3.66637	100.043	6.36698	59.8805	133.78	101.736	3.66637	NA
JG-MDS13_58	436.353	16724.7	1.22396	21.6677	7.31157	0.101505	8.05133	0.0159514	3.37118	0.418711		102.018	3.41213	98.1646	7.53366	5.55209	176.229	102.018	3.41213	NA
JG-MDS13_96	232.368	7758.1	2.26829	20.7179	12.632	0.108102	12.7869	0.0162434	1.98422	0.155176		103.871	2.0445	104.227	12.6669	112.397	299.116	103.871	2.0445	NA
JG-MDS13_8	262.004	22823.8	2.73237	19.4814	8.69067	0.115519	8.87921	0.016322	1.82006	0.204981		104.369	1.88428	111.001	9.33667	255.697	200.109	104.369	1.88428	NA
JG-MDS13_118	319.204	13490.2	1.74888	20.9011	8.13477	0.108337	10.5038	0.0164228	6.64489	0.63262		105.008	6.92115	104.443	10.4255	91.5541	192.978	105.008	6.92115	NA
JG-MDS13_32	110.846	1007.87	2.19105	18.5795	16.9916	0.122304	17.7702	0.0164806	5.20259	0.29277		105.375	5.43767	117.159	19.6656	363.618	385.598	105.375	5.43767	NA
JG-MDS13_52	146.36	7617.8	2.02932	19.4503	11.3249	0.117366	12.6387	0.0165564	5.61094	0.443951		105.856	5.891	112.681	13.4804	259.37	260.907	105.856	5.891	NA
JG-MDS13_70	360.372	14681	1.46281	20.709	5.88406	0.110976	6.16405	0.0166682	1.83666	0.297964		106.564	1.94114	106.858	6.25211	113.415	138.935	106.564	1.94114	NA
JG-MDS13_49	227.103	2371.58	1.58163	18.7902	20.2245	0.12235	20.3735	0.0166737	2.45967	0.120729		106.599	2.60043	117.2	22.555	338.137	462.295	106.599	2.60043	NA
JG-MDS13_37	201.987	8664.36	1.38127	20.2929	14.9694	0.114003	15.3493	0.0167788	3.39364	0.221094		107.266	3.61009	109.621	15.9509	161.095	351.812	107.266	3.61009	NA
JG-MDS13_62	683.381	25460.1	1.35311	20.758	2.13852	0.111611	2.26445	0.0168032	0.744635	0.328837		107.42	0.793262	107.438	2.30859	107.854	50.5179	107.42	0.793262	NA
JG-MDS13_39	495.494	15008.8	0.723934	20.8722	6.2463	0.11108	6.5302	0.0168152	1.90452	0.291648		107.496	2.03031	106.952	6.62905	94.8672	148.008	107.496	2.03031	NA
JG-MDS13_35	234.184	13083.8	2.30694	20.8269	7.66248	0.112396	7.87763	0.0169776	1.82852	0.232115		108.526	1.9678	108.155	8.08216	100.009	181.459	108.526	1.9678	NA
JG-MDS13_20	252.276	12756	2.02055	22.039	13.9263	0.106888	14.1066	0.0170851	2.24807	0.159363		109.208	2.43438	103.114	13.8325	-35.5003	339.322	109.208	2.43438	NA
JG-MDS13_41	84.5238	6500.17	1.27439	21.018	15.1767	0.112401	15.8868	0.0171341	4.69653	0.295624		109.518	5.10009	108.16	16.301	78.3299	362.224	109.518	5.10009	NA
JG-MDS13_38	80.5908	7452.65	1.59747	18.7207	39.0215	0.127192	39.2616	0.0172696	4.33559	0.110428		110.376	4.74473	121.571	45.0136	346.544	914.79	110.376	4.74473	NA
JG-MDS13_114	57.0496	2774.97	1.37625	17.4052	48.3066	0.136903	48.5243	0.0172818	4.59193	0.0946316		110.454	5.02878	130.281	59.3981	509	1126.23	110.454	5.02878	NA
JG-MDS13_82	122.843	1583.87	1.40798	20.5921	17.2229	0.116393	17.3954	0.017383	2.44395	0.140494		111.095	2.69185	111.797	18.4171	126.78	407.979	111.095	2.69185	NA
JG-MDS13_88	71.5807	2896.44	1.28309	22.2178	19.5236	0.1079	20.1828	0.0173868	5.11636	0.2535		111.119	5.63654	104.042	19.9612	-55.1473	479.415	111.119	5.63654	NA
JG-MDS13_28	226.437	8574.86	1.06162	24.8797	9.14291	0.0963839	9.17239	0.017392	0.734775	0.0801073		111.152	0.809716	93.4329	8.18773	-338.494	235.899	111.152	0.809716	NA
JG-MDS13_73	158.459	8809.9	1.58058	21.0122	10.6871	0.114161	11.1613	0.0173975	3.2187	0.288381		111.187	3.5481	109.765	11.6127	78.9859	254.412	111.187	3.5481	NA
JG-MDS13_2	187.563	10454	1.61562	23.5466	12.8495	0.102049	13.0194	0.0174276	2.09692	0.161061		111.378	2.31545	98.6663	12.242	-198.626	322.951	111.378	2.31545	NA
JG-MDS13_85	98.7068	4928.06	1.5241	23.4637	20.3592	0.102552	20.8456	0.0174518	4.4769	0.214765		111.531	4.95021	99.1297	19.69	-189.793	513.51	111.531	4.95021	NA
JG-MDS13_78	119.164	1956.68	1.00377	18.3751	9.77933	0.131029	10.566	0.0174621	4.00051	0.378623		111.596	4.426	125.022	12.4295	388.508	220.023	111.596	4.426	NA
JG-MDS13_19	86.9752	6694.65	1.27934	18.4329	25.3635	0.130736	25.6879	0.0174779	4.06982	0.158433		111.697	4.50669	124.759	30.1663	381.451	578.483	111.697	4.50669	NA
JG-MDS13_34	103.04	5278.99	1.2595	27.5985	33.0428	0.0873884	33.2148	0.017492	3.37579	0.101635		111.786	3.74112	85.0677	27.1103	-613.215	921.203	111.786	3.74112	NA
JG-MDS13_87	105.924	6538.74	1.57526	23.2259	19.2265	0.104008	20.1233	0.0175202	5.94042	0.295201		111.965	6.59374	100.47	19.252	-164.387	482.078	111.965	6.59374	NA
JG-MDS13_69	82.6235	3698.55	1.58345	24.9008	30.7315	0.0971425	30.9174	0.0175437	3.38589	0.109514		112.113	3.76322	94.1352	27.8028	-340.673	807.797	112.113	3.76322	NA
JG-MDS13_107	91.7007	695.776	1.42238	20.5933	22.9722	0.117544	23.316	0.017556	3.98957	0.171109		112.191	4.43723	112.843	24.9063	126.643	546.975	112.191	4.43723	NA
JG-MDS13_113	581.105	28419.1	1.39742	21.0627	5.63492	0.115129	5.98706	0.0175872	2.02301	0.337898		112.389	2.25394	110.646	6.27636	73.2971	134.038	112.389	2.25394	NA
JG-MDS13_90	96.1091	3872.47	1.55585	24.7435	17.2978	0.0980582	17.8391	0.0175972	4.36131	0.24448		112.452	4.86187	94.9823	16.177	-324.377	447.005	112.452	4.86187	NA
JG-MDS13_89	86.8462	6343.29	2.17171	20.496	16.0524	0.11858	16.4832	0.017627	3.74398	0.227139		112.641	4.18064	113.784	17.7443	137.757	379.154	112.641	4.18064	NA
JG-MDS13_79	65.716	3998.7	1.30547	22.8726	27.2201	0.107128	27.9322	0.0177711	6.26711	0.224369		113.554	7.05425	103.334	27.4501	-126.386	682.953	113.554	7.05425	NA
JG-MDS13_50	148.671	4714.06	1.84259	24.4977	15.4846	0.100142	15.685	0.0177927	2.49901	0.159325		113.69	2.81623	96.9075	14.4981	-298.802	397.596	113.69	2.81623	NA
JG-MDS13_56	148.491	7207.95	1.65412	23.0458	17.09	0.107852	17.1474	0.0180269	1.40222	0.0817743		115.174	1.60065	103.999	16.9519	-145.055	426.2	115.174	1.60065	NA
JG-MDS13_75	104.748	1302.02	1.50413	20.3699	22.1972	0.122884	22.3715	0.0181544	2.78694	0.124576		115.981	3.20342	117.683	24.864	152.231	525.613	115.981	3.20342	NA
JG-MDS13_59	183.966	12150.2	0.963981	21.0388	20.2198	0.119169	20.372	0.0181837	2.48517	0.121989		116.167	2.86108	114.318	22.0292	75.9743	484.684	116.167	2.86108	NA
JG-MDS13_111	87.1043	7373.6	1.65345	21.4428	32.2566	0.117591	32.4219	0.0182875	3.26977	0.100851		116.824	3.78547	112.886	34.652	30.6117	790.97	116.824	3.78547	NA
JG-MDS13_120	238.007	13114.4	1.61541	22.7869	9.98149	0.112814	10.1577	0.0186444	1.8837	0.185446		119.083	2.22256	108.537	10.4564	-117.121	246.58	119.083	2.22256	NA
JG-MDS13_57	150.727	7989.66	1.38488	23.1189	15.0223	0.111616	15.1651	0.0187151	2.07607	0.136898		119.53	2.45867	107.443	15.4626	-152.908	374.681	119.53	2.45867	NA
JG-MDS13_99	364.357	26870.7	1.68729	20.3676	6.81596	0.127826	7.47001	0.0188825	3.05675	0.409202		120.59	3.65186	122.143	8.59686	152.511	159.815	120.59	3.65186	NA
JG-MDS13_109	88.2456	3786.67	1.60614	22.0986	21.8206	0.118189	22.378	0.0189426	4.96359	0.221807		120.97	5.94845	113.429	24.0211	-42.0606	535.587	120.97	5.94845	NA
JG-MDS13_106	116.481	5856.87	1.83874	26.5989	32.0679	0.0995925	32.1596	0.0192127	2.42645	0.0754504		122.678	2.94859	96.4001	29.5841	-513.689	874.579	122.678	2.94859	NA
JG-MDS13_91	147.775	8858.97	1.13717	19.1667	23.2067	0.138687	23.2868	0.0192789	1.93004	0.0828814		123.097	2.35329	131.874	28.8064	293.04	536.308	123.097	2.35329	NA
JG-MDS13_60	496.958	26263.2	2.16677	20.0966	3.75841	0.151519	4.0719	0.0220846	1.56674	0.384768		140.817	2.18231	143.252	5.44035	183.754	87.5664	140.817	2.18231	NA
JG-MDS13_4	121.429	9470.54	2.29546	23.4401	14.1355	0.130487	14.2375	0.0221833	1.70079	0.119459		141.44	2.3794	124.536	16.688	-187.277	354.729	141.44	2.3794	NA
JG-MDS13_84	362.907	755.456	0.464974	20.4691	6.14708	0.161866	6.24433	0.0240299	1.09777	0.175803		153.075	1.66062	152.335	8.83337	140.859	144.41	153.075	1.66062	NA
JG-MDS13_5	791.418	9435.63	0.9891	19.8684	2.35067	0.179467	2.46087	0.0258612	0.728159	0.295895		164.592	1.18332	167.602	3.80207	210.314	54.4884	164.592	1.18332	NA
JG-MDS13_119	96.7494	6450.07	1.32279	18.5254	14.3796	0.192525	14.6988	0.0258674	3.04659	0.207268		164.632	4.95217	178.782	24.0998	370.196	325.364	164.632	4.95217	NA
JG-MDS13_71	122.304	25115.9	1.26941	20.9382	14.0699	0.175658	14.2594	0.026675	2.31683	0.162478		169.705	3.88048	164.317	21.6363	87.4029	334.998	169.705	3.88048	NA
JG-MDS13_102	514.483	10142.2	1.37568	20.3877	3.80994	0.18976	4.17019	0.0280591	1.69552	0.406582		178.389	2.98317	176.425	6.75364	150.173	89.3303	178.389	2.98317	NA
JG-MDS13_63	928.366	65316.5	1.96587	19.906	1.97678	0.203887	2.07483	0.0294356	0.630288	0.303779		187.015	1.1618	188.41	3.56794	205.929	45.8681	187.015	1.1618	NA
JG-MDS13_112	294.973	29897.8	2.29529	20.4854	3.67995	0.204506	3.93389	0.0303843	1.39051	0.353469		192.953	2.64328	188.932	6.78198	138.944	86.4405	192.953	2.64328	NA
JG-MDS13_66	78.6101	9264.1	2.41904	21.1853	8.88879	0.347406	9.1552	0.053379	2.19249	0.23948		335.234	7.16211	302.769	23.9727	59.5135	212.218	335.234	7.16211	NA
JG-MDS13_Sl	530.383	103499	4.32306	16.9575	0.81403	0.739722	0.89546	0.0909765	0.3731	0.416657		561.309	2.00566	562.243	3.86604	566.047	17.7055	561.309	2.00566	99.1631
JG-MDS13_25	476.802	580590	3.30276	11.0535	0.489311	3.04311	2.10101	0.243958	2.04323	0.972502		1407.24	25.8314	1418.5	16.0581	1435.44	9.3324	1435.44	9.3324	98.0357
JG-MDN1
JG-MDN1-75	159.346	455.232	1.83711	7.98474	149.168	0.0334537	150.765	0.00193733	21.887	0.145173		12.4767	2.72814	33.4125	49.594	2032.16	103.593	12.4767	2.72814	NA
JG-MDN1-66	228.676	1408.62	1.46429	12.607	166.942	0.0244971	167.047	0.00223988	5.91417	0.0354042		14.423	0.852049	24.5742	40.5793	1180.18	594.163	14.423	0.852049	NA
JG-MDN1-26	61.0925	333.2	2.24621	28.2656	113.093	0.01097	118.136	0.00224887	34.148	0.289056		14.4809	4.93938	11.0781	13.0169	-678.776	0	14.4809	4.93938	NA
JG-MDN1-101	270.141	3017.2	1.15658	36.6878	80.5166	0.0139238	80.6785	0.0037049	5.10861	0.0633206		23.8392	1.2156	14.0404	11.2501	NA	NA	23.8392	1.2156	NA
JG-MDN1-28	187.661	2264.51	1.50883	14.4982	121.095	0.0357632	121.282	0.00376054	6.74378	0.0556039		24.1966	1.6287	35.6791	42.546	897.941	520.161	24.1966	1.6287	NA
JG-MDN1-58	370.518	5319.87	2.14497	19.4505	8.14256	0.0294881	9.14646	0.00415984	4.16609	0.455487		26.7604	1.11255	29.5088	2.66017	259.359	187.333	26.7604	1.11255	NA
JG-MDN1-3	458.971	4495.04	2.01798	21.4567	13.8396	0.0271022	15.5231	0.00421761	7.03096	0.452935		27.1313	1.90358	27.1528	4.15913	29.0722	333.087	27.1313	1.90358	NA
JG-MDN1-5	145.066	3130.84	1.11888	22.0807	54.6218	0.0301311	55.1688	0.00482533	7.74927	0.140465		31.0313	2.39892	30.1428	16.3864	-40.0923	1426.74	31.0313	2.39892	NA
JG-MDN1-47	154.625	1763.54	1.00266	23.4222	26.4831	0.0285527	27.4315	0.00485035	7.1505	0.260668		31.1918	2.22498	28.5858	7.73229	-185.365	671.534	31.1918	2.22498	NA
JG-MDN1-51	148.001	2425.43	1.27305	17.3498	22.3214	0.0553563	22.7907	0.00696562	4.60133	0.201895		44.7476	2.05185	54.7073	12.1388	515.994	495.804	44.7476	2.05185	NA
JG-MDN1-30	616.139	56018.8	0.911089	22.8877	8.3814	0.0431757	8.57361	0.00716703	1.80526	0.21056		46.0369	0.828125	42.9198	3.60311	-128.016	207.341	46.0369	0.828125	NA
JG-MDN1-23	414.735	7008.91	0.688976	20.9376	8.53891	0.0517393	8.67639	0.0078568	1.5384	0.177309		50.4503	0.773099	51.2212	4.33395	87.4681	202.774	50.4503	0.773099	NA
JG-MDN1-96	820.469	30191.9	4.01494	20.8854	4.48592	0.0837539	4.66648	0.0126866	1.28551	0.275477		81.2688	1.03816	81.6681	3.66181	93.3422	106.269	81.2688	1.03816	NA
JG-MDN1-7	917.593	46362.8	1.55471	20.8805	1.93061	0.0889918	2.40886	0.0134769	1.4406	0.598045		86.2972	1.23492	86.5637	1.99879	93.9177	45.7127	86.2972	1.23492	NA
JG-MDN1-64	929.245	58130.4	1.55326	20.9098	3.89806	0.0900187	4.03826	0.0136515	1.05481	0.261204		87.408	0.915765	87.5208	3.38629	90.6063	92.377	87.408	0.915765	NA
JG-MDN1-74	853.917	31501.5	1.48532	21.4189	4.09794	0.0888824	4.15683	0.0138074	0.69724	0.167733		88.3991	0.612147	86.4617	3.44531	33.2647	98.169	88.3991	0.612147	NA
JG-MDN1-46	840.762	30536.8	1.7019	21.5133	4.36479	0.0895868	4.57844	0.0139782	1.38231	0.301917		89.485	1.22842	87.1184	3.82237	22.7365	104.799	89.485	1.22842	NA
JG-MDN1-71	694.811	26614.1	1.46805	20.5088	3.60288	0.0941766	3.70064	0.0140082	0.844996	0.228337		89.6759	0.752511	91.3866	3.23418	136.264	84.6872	89.6759	0.752511	NA
JG-MDN1-48	466.845	11562.2	0.816341	20.5995	4.28141	0.0944545	4.37386	0.0141116	0.894564	0.204525		90.3336	0.802456	91.6445	3.83285	125.888	100.83	90.3336	0.802456	NA
JG-MDN1-63	513.068	16021.9	2.03152	21.3731	5.81581	0.091243	6.27835	0.0141438	2.36517	0.376719		90.538	2.12641	88.6606	5.33038	38.3844	139.247	90.538	2.12641	NA
JG-MDN1-6	442.062	20729	2.1093	21.2027	6.22373	0.0921302	6.32378	0.0141674	1.12043	0.177178		90.6882	1.00899	89.4858	5.41674	57.5094	148.499	90.6882	1.00899	NA
JG-MDN1-4	286.37	10306.8	2.23249	22.0399	7.99991	0.0886975	8.75134	0.0141782	3.54787	0.405409		90.7565	3.19736	86.2893	7.23962	-35.6017	194.383	90.7565	3.19736	NA
JG-MDN1-73	426.217	19129.4	1.89159	22.5271	4.54878	0.0872541	4.68812	0.0142557	1.1345	0.241996		91.2494	1.02794	84.9422	3.8202	-88.9299	111.577	91.2494	1.02794	NA
JG-MDN1-60	439.099	25119.8	1.68534	20.4531	4.99966	0.0961117	5.12335	0.0142572	1.11896	0.218403		91.2587	1.01395	93.1808	4.5615	142.685	117.417	91.2587	1.01395	NA
JG-MDN1-55	468.128	13782.7	1.22035	20.9476	4.59343	0.0940474	4.82491	0.0142883	1.47655	0.306027		91.4564	1.34087	91.2667	4.21146	86.3323	108.984	91.4564	1.34087	NA
JG-MDN1-36	458.594	12456.7	1.3508	20.0824	6.18327	0.0985968	6.37981	0.0143607	1.57132	0.246296		91.9167	1.43406	95.4803	5.81389	185.41	144.104	91.9167	1.43406	NA
JG-MDN1-17	417.053	16855.3	1.81667	20.4395	5.52786	0.0970417	5.83262	0.0143856	1.86072	0.319019		92.0746	1.70107	94.042	5.23881	144.213	129.778	92.0746	1.70107	NA
JG-MDN1-16	621.328	26231.1	1.15391	20.4164	4.97947	0.0972698	5.18819	0.0144031	1.4568	0.280791		92.1861	1.33341	94.253	4.66997	146.906	116.823	92.1861	1.33341	NA
JG-MDN1-77	405.315	8014.56	1.793	21.3239	7.13758	0.0936777	7.36653	0.0144878	1.8223	0.247375		92.7243	1.67762	90.9235	6.40687	43.9391	170.806	92.7243	1.67762	NA
JG-MDN1-86	640.263	42491.5	1.21145	21.1725	3.21894	0.0943678	3.61583	0.0144909	1.64702	0.455502		92.7439	1.51657	91.5641	3.16592	60.9468	76.7135	92.7439	1.51657	NA
JG-MDN1-45	498.465	20778	1.33043	20.481	4.52465	0.097734	4.60121	0.0145176	0.835887	0.181667		92.9136	0.771082	94.6825	4.15961	139.463	106.312	92.9136	0.771082	NA
JG-MDN1-99	691.365	16547.1	1.69903	20.5748	2.80956	0.0973218	2.95718	0.0145226	0.922644	0.312001		92.9454	0.851402	94.3012	2.66308	128.756	66.14	92.9454	0.851402	NA
JG-MDN1-89	949.895	52355.3	1.59674	20.4235	2.81252	0.0980483	4.08711	0.0145234	2.9655	0.725574		92.9505	2.73667	94.9732	3.70567	146.095	65.9757	92.9505	2.73667	NA
JG-MDN1-9	320.4	18771.7	2.1792	21.5643	9.07938	0.0929799	9.56487	0.014542	3.00858	0.314545		93.0687	2.77993	90.2755	8.2622	17.0268	218.515	93.0687	2.77993	NA
JG-MDN1-21	374.29	15752.1	1.47695	21.9793	4.96921	0.0913868	5.72394	0.0145679	2.84085	0.496309		93.2331	2.62955	88.7944	4.86668	-28.9218	120.484	93.2331	2.62955	NA
JG-MDN1-49	278.011	9513.54	1.40893	22.1118	9.02458	0.0909187	9.40496	0.0145806	2.64769	0.281521		93.314	2.45287	88.3588	7.95897	-43.5076	219.696	93.314	2.45287	NA
JG-MDN1-37	481.707	20034.8	1.2771	20.9127	3.48893	0.0961576	3.57024	0.0145845	0.757601	0.212199		93.3388	0.702041	93.2233	3.18009	90.256	82.7028	93.3388	0.702041	NA
JG-MDN1-53	460.616	24221.3	1.60456	21.4502	5.42548	0.0938991	5.48399	0.014608	0.79895	0.145688		93.4882	0.741534	91.1291	4.77984	29.7957	130.109	93.4882	0.741534	NA
JG-MDN1-25	571.435	18200.4	1.29823	20.5853	4.39806	0.0979596	4.46383	0.0146253	0.763473	0.171035		93.5977	0.70943	94.8912	4.0439	127.549	103.54	93.5977	0.70943	NA
JG-MDN1-32	452.328	25558.5	1.40331	20.5666	5.86778	0.0981784	5.94882	0.0146446	0.978612	0.164505		93.7206	0.910527	95.0934	5.40018	129.679	138.118	93.7206	0.910527	NA
JG-MDN1-11	615.186	28255.1	1.05093	20.9328	3.79731	0.0966168	3.93587	0.0146682	1.03514	0.263001		93.8708	0.964653	93.6486	3.52104	88.0151	90.0317	93.8708	0.964653	NA
JG-MDN1-20	293.425	39437.6	1.36692	20.4002	9.92436	0.0991762	9.98641	0.0146737	1.11154	0.111305		93.9057	1.03623	96.0156	9.14937	148.722	233.116	93.9057	1.03623	NA
JG-MDN1-61	398.602	10686	1.75162	22.0104	5.40917	0.0919703	5.53792	0.0146816	1.18717	0.214372		93.9558	1.10733	89.3371	4.73605	-32.3494	131.254	93.9558	1.10733	NA
JG-MDN1-67	521.842	20134.9	1.43937	20.2397	5.1755	0.100034	5.36798	0.0146842	1.42455	0.265379		93.9724	1.32897	96.8081	4.95664	167.214	120.987	93.9724	1.32897	NA
JG-MDN1-102	215.008	12010.3	1.3651	25.7373	17.1123	0.0786865	17.2511	0.014688	2.1839	0.126595		93.9961	2.03789	76.9093	12.7783	-426.564	451.384	93.9961	2.03789	NA
JG-MDN1-69	342.046	11850	1.7378	21.8244	8.23822	0.092907	8.4109	0.0147059	1.6956	0.201596		94.1098	1.58413	90.2078	7.26014	-11.8118	199.306	94.1098	1.58413	NA
JG-MDN1-35	263.13	8057.26	1.88543	19.0925	11.0259	0.106213	11.1634	0.0147075	1.74657	0.156455		94.1202	1.63193	102.495	10.8838	301.862	252.045	94.1202	1.63193	NA
JG-MDN1-100	475.218	31439.8	1.20503	21.6622	4.91439	0.0936806	5.14277	0.0147181	1.51555	0.294696		94.1875	1.41709	90.9263	4.4729	6.16386	118.379	94.1875	1.41709	NA
JG-MDN1-31	739.436	46776.9	0.898191	20.7065	2.61106	0.0980112	3.11836	0.0147191	1.70486	0.546717		94.1936	1.5942	94.9388	2.82635	113.724	61.6164	94.1936	1.5942	NA
JG-MDN1-12	618.932	27274.7	1.04518	21.0648	3.17128	0.0963767	3.23861	0.0147241	0.656951	0.20285		94.2255	0.614514	93.4263	2.89069	73.0609	75.3905	94.2255	0.614514	NA
JG-MDN1-1	269.202	14816.8	1.24787	21.5538	12.024	0.0942794	12.4443	0.014738	3.207	0.257708		94.3141	3.00263	91.482	10.8869	18.2459	289.69	94.3141	3.00263	NA
JG-MDN1-78	302.913	15728.1	1.76715	21.9929	4.04068	0.0925136	4.77817	0.0147566	2.55025	0.533731		94.432	2.3907	89.8422	4.10839	-30.4165	97.9849	94.432	2.3907	NA
JG-MDN1-41	417.474	17218.2	1.53967	20.7332	6.47688	0.0981779	6.67542	0.0147631	1.61597	0.242078		94.4735	1.51553	95.093	6.05975	110.659	153.023	94.4735	1.51553	NA
JG-MDN1-14	425.389	20132.5	1.56188	21.7442	8.83759	0.0936859	8.92968	0.0147746	1.27914	0.143246		94.5467	1.20056	90.9312	7.76705	-2.92558	213.487	94.5467	1.20056	NA
JG-MDN1-93	590.776	17258	1.20343	20.4566	3.48833	0.0997249	3.94621	0.0147957	1.84502	0.467543		94.6803	1.73411	96.5223	3.63355	142.278	81.8971	94.6803	1.73411	NA
JG-MDN1-72	226.717	13281	1.88585	22.1064	14.0041	0.0924825	14.2481	0.0148278	2.62557	0.184275		94.8842	2.47301	89.8133	12.2476	-42.9161	341.732	94.8842	2.47301	NA
JG-MDN1-83	588.085	29026.1	1.59323	20.3381	3.40586	0.100918	3.50744	0.0148859	0.838013	0.238924		95.2537	0.79237	97.6233	3.26464	155.903	79.7679	95.2537	0.79237	NA
JG-MDN1-10	466.445	14400.9	1.19057	20.6165	5.53486	0.0996574	5.68777	0.0149012	1.31	0.230319		95.3508	1.2399	96.46	5.23393	123.947	130.429	95.3508	1.2399	NA
JG-MDN1-18	340.093	11798.2	1.29677	20.9873	6.79171	0.0981171	6.84459	0.0149348	0.849205	0.124069		95.5641	0.80555	95.0368	6.20982	81.7996	161.34	95.5641	0.80555	NA
JG-MDN1-104	420.964	11611.6	1.06777	21.8923	4.87064	0.0941397	5.00531	0.0149473	1.15323	0.230402		95.6437	1.09485	91.3524	4.37284	-19.3226	117.874	95.6437	1.09485	NA
JG-MDN1-8	551.925	54324.4	1.14778	20.9316	3.15699	0.0984656	3.68661	0.0149481	1.90381	0.516413		95.6483	1.80752	95.359	3.3555	88.1513	74.8543	95.6483	1.80752	NA
JG-MDN1-52	349.28	16412.1	1.2755	23.2756	5.7834	0.0886157	6.1346	0.0149593	2.04587	0.333498		95.7197	1.94384	86.213	5.07056	-169.711	144.147	95.7197	1.94384	NA
JG-MDN1-68	476.419	11770.1	1.37312	21.0221	3.96665	0.0982638	4.41534	0.0149819	1.9393	0.439218		95.8634	1.84532	95.1725	4.01128	77.867	94.228	95.8634	1.84532	NA
JG-MDN1-81	469.235	23021.1	0.905665	20.6154	6.96794	0.100232	7.22656	0.0149864	1.91598	0.26513		95.8919	1.82367	96.9906	6.68484	124.068	164.259	95.8919	1.82367	NA
JG-MDN1-82	470.074	21389.8	1.52683	20.8103	4.64207	0.0995188	5.02129	0.0150204	1.91429	0.381235		96.1077	1.82613	96.3321	4.61478	101.873	109.797	96.1077	1.82613	NA
JG-MDN1-76	345.622	39773.6	1.52811	20.1579	4.89837	0.103079	5.19024	0.01507	1.71599	0.330618		96.4226	1.64229	99.6145	4.92475	176.667	114.308	96.4226	1.64229	NA
JG-MDN1-14	751.284	36359.8	1.37791	20.9231	2.63088	0.0993427	2.7258	0.0150751	0.713091	0.261608		96.4553	0.682694	96.1694	2.50108	89.1079	62.3906	96.4553	0.682694	NA
JG-MDN1-84	111.227	6652.73	1.33744	30.0858	37.6477	0.0692227	38.0191	0.0151046	5.30171	0.139448		96.6424	5.08549	67.9616	24.9977	-854.566	1112.65	96.6424	5.08549	NA
JG-MDN1-103	338.205	10730.1	2.12897	20.9118	7.4163	0.0996304	7.51989	0.0151106	1.2439	0.165415		96.6806	1.19364	96.4351	6.9182	90.3436	175.931	96.6806	1.19364	NA
JG-MDN1-62	217.265	7204.36	1.14034	18.8098	7.94272	0.111813	8.36782	0.0152537	2.63318	0.314679		97.5892	2.55035	107.622	8.54501	335.77	180.225	97.5892	2.55035	NA
JG-MDN1-22	373.677	15665.2	1.16149	20.4816	5.21626	0.102723	5.61511	0.0152591	2.07848	0.370158		97.6236	2.0138	99.2865	5.31119	139.395	122.54	97.6236	2.0138	NA
JG-MDN1-56	333.771	40382.6	1.41265	20.9392	9.52293	0.100519	9.65321	0.0152653	1.58058	0.163736		97.6629	1.532	97.2549	8.95286	87.2865	226.235	97.6629	1.532	NA
JG-MDN1-27	359.764	10791.4	1.40546	19.4418	8.47783	0.108352	8.67274	0.0152782	1.82834	0.210815		97.7446	1.77362	104.456	8.60904	260.418	195.049	97.7446	1.77362	NA
JG-MDN1-29	95.4566	14792.8	1.69699	20.5358	26.4143	0.103078	26.899	0.0153524	5.08346	0.188983		98.216	4.95493	99.6135	25.528	133.21	630.585	98.216	4.95493	NA
JG-MDN1-92	265.504	15712.2	1.98988	22.708	9.89216	0.0934883	10.095	0.0153969	2.01333	0.199439		98.4986	1.96803	90.7477	8.76373	-108.577	243.946	98.4986	1.96803	NA
JG-MDN1-90	532.975	25972.5	1.12637	20.1669	6.42754	0.105441	6.70578	0.0154223	1.91162	0.28507		98.6596	1.87163	101.787	6.49471	175.615	150.065	98.6596	1.87163	NA
JG-MDN1-24	349.225	15725	1.2155	22.2989	9.23897	0.0960458	9.30728	0.0155332	1.12557	0.120934		99.3637	1.10983	93.1197	8.28155	-64.032	225.821	99.3637	1.10983	NA
JG-MDN1-40	397.055	6326.74	1.16655	20.549	5.99631	0.104535	7.39577	0.0155794	4.32917	0.585357		99.6572	4.28115	100.954	7.10729	131.705	141.096	99.6572	4.28115	NA
JG-MDN1-94	1661.05	102887	1.72407	20.4195	1.52178	0.105534	1.63197	0.0156292	0.589512	0.361227		99.9731	0.584807	101.872	1.58184	146.555	35.6897	99.9731	0.584807	NA
JG-MDN1-95	186.577	11553.7	1.52694	20.3697	7.83703	0.106463	8.03109	0.0157284	1.75481	0.218502		100.602	1.75168	102.725	7.84649	152.271	183.838	100.602	1.75168	NA
JG-MDN1-13	205.344	11869.7	1.52756	19.5926	6.50139	0.111777	7.50362	0.0158834	3.7465	0.499292		101.587	3.77611	107.59	7.66029	242.599	149.94	101.587	3.77611	NA
JG-MDN1-39	293.085	11612.6	0.992914	20.4069	6.43064	0.108978	7.21287	0.0161293	3.26686	0.452921		103.147	3.34285	105.03	7.19719	147.996	150.889	103.147	3.34285	NA
JG-MDN1-38	333.101	21023.9	1.7835	21.8847	8.89192	0.10274	9.03648	0.0163072	1.60986	0.178151		104.275	1.66518	99.3028	8.54885	-18.4734	215.445	104.275	1.66518	NA
JG-MDN1-105	204.182	8054.66	1.84269	21.9341	13.8854	0.103001	14.0666	0.0163855	2.25062	0.159997		104.772	2.33896	99.5431	13.3387	-23.9307	337.573	104.772	2.33896	NA
JG-MDN1-80	534.951	18272	2.07131	20.5383	2.98062	0.111505	3.12628	0.0166096	0.943164	0.301688		106.193	0.993367	107.341	3.18452	132.93	70.0763	106.193	0.993367	NA
JG-MDN1-33	130.712	5479.01	1.71061	20.0894	11.1341	0.116921	11.9575	0.0170357	4.36057	0.364672		108.894	4.70852	112.277	12.7105	184.59	259.96	108.894	4.70852	NA
JG-MDN1-50	109.895	8682.94	1.25814	21.1453	15.1162	0.111198	15.4439	0.0170534	3.16469	0.204915		109.006	3.42071	107.061	15.6938	63.986	361.724	109.006	3.42071	NA
JG-MDN1-25	191.876	9179.57	5.6519	20.5125	12.5665	0.114897	12.803	0.0170933	2.44957	0.191328		109.259	2.65383	110.435	13.398	135.836	296.265	109.259	2.65383	NA
JG-MDN1-98	413.267	35932.3	1.37397	21.1535	5.09075	0.111557	5.91837	0.017115	3.01851	0.510024		109.397	3.27431	107.389	6.03118	63.041	121.3	109.397	3.27431	NA
JG-MDN1-43	1448.93	87434.2	0.805662	21.0737	1.15474	0.116886	1.61384	0.017865	1.1274	0.698586		114.149	1.27559	112.245	1.71492	72.0524	27.4621	114.149	1.27559	NA
JG-MDN1-19	560.403	101400	5.53415	20.7083	4.12106	0.121275	4.59576	0.0182143	2.03419	0.442623		116.36	2.34576	116.227	5.04718	113.49	97.2744	116.36	2.34576	NA
JG-MDN1-97	179.655	6147.65	0.632578	23.6141	13.6626	0.10867	13.9641	0.0186114	2.88603	0.206676		118.874	3.39931	104.748	13.8988	-205.799	344.027	118.874	3.39931	NA
JG-MDN1-79	101.228	5038.68	1.39581	20.0056	13.4592	0.128988	13.9558	0.0187155	3.68947	0.264369		119.533	4.3695	123.188	16.1913	194.361	314.086	119.533	4.3695	NA
JG-MDN1-34	651.273	39390	1.46426	20.7327	2.50609	0.127884	2.65846	0.0192297	0.887111	0.333693		122.786	1.07894	122.195	3.06065	110.685	59.1489	122.786	1.07894	NA
JG-MDN1-70	540.565	25685.6	0.82695	20.7289	3.78713	0.128427	3.8996	0.0193078	0.929823	0.23844		123.28	1.13539	122.684	4.50648	111.126	89.421	123.28	1.13539	NA
JG-MDN1-42	2290.2	190277	2.36218	20.6211	0.575755	0.134285	1.75675	0.0200835	1.65972	0.944768		128.184	2.10648	127.941	2.11177	123.412	13.5765	128.184	2.10648	NA
JG-MDN1-65	164.525	20960.6	1.58939	18.3772	7.14067	0.172665	7.64731	0.0230135	2.73719	0.357929		146.673	3.96939	161.729	11.4337	388.249	160.526	146.673	3.96939	NA
JG-MDN1-54	211.537	10987.6	1.70416	20.0941	7.88464	0.178655	7.95846	0.0260365	1.08146	0.135888		165.694	1.76908	166.903	12.2492	184.047	183.877	165.694	1.76908	NA
JG-MDN1-91	43.946	3471.6	2.40466	29.1853	44.1953	0.132174	44.7998	0.0279776	7.3346	0.163719		177.879	12.8683	126.05	53.1541	-768.14	1297.84	177.879	12.8683	NA
JG-MDN1-88	141.733	11561.2	1.74508	22.4173	10.1779	0.196676	10.3302	0.0319767	1.76729	0.171081		202.908	3.53012	182.31	17.2407	-76.9652	249.487	202.908	3.53012	NA
JG-MDN1-57	519.28	123979	4.40506	16.9877	0.697839	0.744907	0.813174	0.0917775	0.41746	0.513371		566.041	2.26222	565.265	3.52489	562.124	15.2232	566.041	2.26222	100.697
JG-MDN1-2	261.251	333734	2.10798	10.6219	0.498984	3.37473	0.578384	0.25998	0.292478	0.50568		1489.74	3.89034	1498.55	4.5304	1511.01	9.41934	1511.01	9.41934	98.5923
JG-MDN1-59	405.141	325588	0.813132	5.62648	0.089871	11.86	0.471789	0.483971	0.46315	0.981689		2544.54	9.7372	2593.41	4.41798	2631.8	1.49364	2631.8	1.49364	96.6844
JG-MDN2
JG-MDN2-100	167.689	627.093	4.26865	11.3171	201.894	0.0194476	203.047	0.00159624	21.6013	0.106386		10.2818	2.21923	19.5572	39.3499	1390.35	617.651	10.2818	2.21923	NA
JG-MDN2-7	178.834	707.438	3.86622	-11.3555	221.452	-0.020416	222.87	0.00168141	25.0999	0.112621		10.83	2.71603	-20.9446	-47.1979	NA	NA	10.83	2.71603	NA
JG-MDN2-15	786.635	4944.45	1.86168	22.2111	25.1203	0.0105698	25.9966	0.0017027	6.69272	0.257446		10.9669	0.733363	10.6761	2.76089	-54.4098	620.135	10.9669	0.733363	NA
JG-MDN2-37	477.37	2885.02	2.02745	32.3628	79.1958	0.00745157	79.6363	0.00174901	8.36495	0.105039		11.265	0.941489	7.53815	5.98095	-1069.01	1164.51	11.265	0.941489	NA
JG-MDN2-34	399.696	9243.06	1.87627	19.6415	29.5838	0.012553	31.6399	0.00178822	11.2197	0.354606		11.5173	1.29105	12.6668	3.98288	236.862	695.962	11.5173	1.29105	NA
JG-MDN2-45	474.913	3896.09	1.69329	32.8053	48.5385	0.00772392	49.1949	0.00183773	8.00919	0.162805		11.8359	0.947088	7.81261	3.82867	-1110.09	1549.87	11.8359	0.947088	NA
JG-MDN2-79	391.742	2424.64	2.10068	26.0677	32.8204	0.00973332	33.9058	0.00184019	8.51047	0.251003		11.8517	1.00771	9.83526	3.31864	-460.129	886.318	11.8517	1.00771	NA
JG-MDN2-109	843.532	2438.39	1.42644	25.1387	43.4862	0.0101006	43.7911	0.00184157	5.15846	0.117797		11.8606	0.611261	10.2045	4.44632	-365.237	1174.01	11.8606	0.611261	NA
JG-MDN2-22	289.6	1978.23	2.00177	20.9073	55.589	0.0121866	61.1611	0.00184791	25.5058	0.417026		11.9014	3.03274	12.2993	7.47714	90.8819	1422.67	11.9014	3.03274	NA
JG-MDN2-113	386.099	6946.96	1.58891	30.2974	119.361	0.00844237	120.298	0.0018551	14.9849	0.124565		11.9477	1.78869	8.53626	10.2262	-874.727	0	11.9477	1.78869	NA
JG-MDN2-10	259.69	672.398	2.12264	-6.3086	391.425	-0.0407207	391.579	0.00186315	10.9798	0.0280398		11.9994	1.31629	-42.2126	-170.36	NA	NA	11.9994	1.31629	NA
JG-MDN2-97	440.954	2239.19	2.33135	14.2434	22.9387	0.0181431	26.183	0.00187424	12.6241	0.482147		12.0708	1.5224	18.2571	4.73757	934.459	476.562	12.0708	1.5224	NA
JG-MDN2-38	161.699	781.58	1.15471	6.67256	197.333	0.0394611	198.836	0.00190968	24.4011	0.12272		12.2988	2.99819	39.2978	76.7915	2344.4	106.842	12.2988	2.99819	NA
JG-MDN2-11	194.446	3278.28	1.17325	13.6725	46.8281	0.0192888	50.2093	0.00191272	18.1138	0.360765		12.3184	2.2292	19.399	9.64794	1017.8	1005.17	12.3184	2.2292	NA
JG-MDN2-77	186.212	2259.55	1.23277	29.736	94.7022	0.00888574	97.0562	0.00191635	21.246	0.218904		12.3418	2.61962	8.98258	8.67991	-821.114	0	12.3418	2.61962	NA
JG-MDN2-17	410.401	6165.52	2.18037	25.4766	92.8892	0.0104059	93.5195	0.00192273	10.8394	0.115905		12.3828	1.34094	10.5114	9.77977	-399.941	3473.35	12.3828	1.34094	NA
JG-MDN2-78	180.617	1637.34	1.68113	1.6079	711.154	0.167619	711.324	0.00195471	15.556	0.0218691		12.5886	1.95638	157.351	#NUM!	NA	NA	12.5886	1.95638	NA
JG-MDN2-72	3362.62	1937.96	0.698835	18.965	14.2593	0.0147585	16.42	0.00202999	8.1417	0.495841		13.0729	1.06328	14.876	2.42484	317.118	325.667	13.0729	1.06328	NA
JG-MDN2-76	350.295	3396.36	1.35234	4.14354	581.995	0.0752123	582.024	0.00226026	5.8006	0.00996627		14.5541	0.843275	73.6337	438.816	3128.82	339.051	14.5541	0.843275	NA
JG-MDN2-99	265.605	2017.73	1.57899	23.8742	44.5153	0.015206	45.9721	0.00263295	11.4814	0.249747		16.9508	1.94363	15.3237	6.99183	-233.352	1173.82	16.9508	1.94363	NA
JG-MDN2-28	100.921	1607.04	0.40631	7.64872	251.163	0.0680681	252.138	0.00377599	22.1518	0.0878561		24.2958	5.37183	66.8645	164.586	2107.93	269.894	24.2958	5.37183	NA
JG-MDN2-86	147.908	1874.11	1.55026	119.123	134.527	0.00438963	134.812	0.00379246	8.76994	0.0650531		24.4015	2.13595	4.4474	5.9826	NA	NA	24.4015	2.13595	NA
JG-MDN2-73	148.186	2014.08	1.43297	-1.75166	1241.04	-0.298669	1241.08	0.00379437	9.98375	0.00804443		24.4138	2.4328	-360.233	#NUM!	NA	NA	24.4138	2.4328	NA
JG-MDN2-61	699.364	8647.73	0.661978	21.2368	13.0114	0.0251737	13.3165	0.00387734	2.83424	0.212836		24.9466	0.705679	25.2445	3.32026	53.7154	311.559	24.9466	0.705679	NA
JG-MDN2-92	1506.03	29137.9	1.88155	21.442	7.29245	0.0270844	7.52347	0.00421194	1.8501	0.24591		27.0949	0.500231	27.1352	2.01448	30.7259	174.946	27.0949	0.500231	NA
JG-MDN2-62	241.958	3072.25	0.496088	26.116	24.4731	0.0243392	24.8606	0.0046101	4.37266	0.175887		29.6503	1.29353	24.4176	5.99804	-465.019	654.78	29.6503	1.29353	NA
JG-MDN2-51	3963.85	65468.9	1.49773	21.6511	2.49882	0.0409798	3.95675	0.00643502	3.06786	0.775348		41.3499	1.2645	40.7802	1.5816	7.38936	60.1551	41.3499	1.2645	NA
JG-MDN2-30	140.958	3064.29	1.11893	21.6426	31.6049	0.0474359	32.3084	0.00744588	6.70559	0.207549		47.8214	3.19484	47.0581	14.8579	8.30995	777.469	47.8214	3.19484	NA
JG-MDN2-89	586.24	22239.4	1.15769	19.945	6.86475	0.053335	7.03527	0.00771518	1.53954	0.218832		49.5443	0.759833	52.7607	3.61708	201.367	159.539	49.5443	0.759833	NA
JG-MDN2-115	366.736	17241.3	5.41811	21.4933	5.27751	0.0907263	5.4112	0.0141428	1.19538	0.220909		90.5317	1.07463	88.1797	4.57029	24.9904	126.674	90.5317	1.07463	NA
JG-MDN2-47	312.119	17564.8	1.76505	21.7829	8.14116	0.0899577	8.40657	0.0142119	2.09569	0.249292		90.9711	1.89308	87.464	7.04505	-7.21397	196.78	90.9711	1.89308	NA
JG-MDN2-75	671.548	19250.7	17.4928	21.719	2.59255	0.091038	2.7707	0.0143404	0.977476	0.35279		91.7875	0.890844	88.4699	2.34749	-0.123785	62.5022	91.7875	0.890844	NA
JG-MDN2-108	189.326	8175.12	2.07787	21.311	10.0243	0.0932759	10.6675	0.0144169	3.64799	0.341974		92.2738	3.34216	90.5505	9.24151	45.3907	240.061	92.2738	3.34216	NA
JG-MDN2-6	161.709	12239.4	2.02177	26.4362	15.8435	0.0753937	16.0179	0.0144555	2.35719	0.147159		92.519	2.16527	73.805	11.4031	-497.337	423.692	92.519	2.16527	NA
JG-MDN2-14	132.537	6730.81	1.89751	22.7699	25.9728	0.0880673	26.2774	0.0145437	3.9892	0.151811		93.0793	3.68644	85.7014	21.5991	-115.283	649.337	93.0793	3.68644	NA
JG-MDN2-59	78.3233	4635.77	2.16061	24.4975	46.0358	0.0829259	46.4945	0.0147337	6.51492	0.140123		94.2864	6.09799	80.892	36.1665	-298.78	1233.66	94.2864	6.09799	NA
JG-MDN2-115	433.534	18850.8	2.00954	20.5549	4.80632	0.0990506	4.96417	0.0147663	1.24188	0.250168		94.4935	1.16493	95.8996	4.54275	131.033	113.092	94.4935	1.16493	NA
JG-MDN2-80	419.453	23954.2	1.05843	20.1688	4.70722	0.101106	5.84483	0.0147895	3.4647	0.59278		94.641	3.25508	97.7964	5.44945	175.406	109.871	94.641	3.25508	NA
JG-MDN2-21	349.535	17460.7	1.64042	20.7559	4.69868	0.0998095	5.02299	0.0150249	1.77564	0.353502		96.1364	1.69437	96.6005	4.6286	108.068	111.021	96.1364	1.69437	NA
JG-MDN2-49	828.787	38752.1	40.5747	20.2531	3.74178	0.102944	3.80452	0.0151214	0.688058	0.180853		96.7494	0.660722	99.4906	3.60563	165.66	87.4757	96.7494	0.660722	NA
JG-MDN2-106	325.601	11585.9	1.44633	20.75	4.29661	0.101579	4.44923	0.0152869	1.15533	0.25967		97.8003	1.12139	98.2329	4.16587	108.724	101.532	97.8003	1.12139	NA
JG-MDN2-35	736.766	48175.3	1.58971	20.6511	2.09491	0.102218	2.52199	0.0153097	1.40419	0.556781		97.9451	1.36494	98.8216	2.37484	120.001	49.3586	97.9451	1.36494	NA
JG-MDN2-41	278.309	12813.1	3.32308	20.0997	8.31572	0.105134	8.46683	0.015326	1.59254	0.188091		98.0483	1.54964	101.504	8.17875	183.405	193.964	98.0483	1.54964	NA
JG-MDN2-116	143.33	12208.9	1.70064	19.9473	15.4065	0.106104	16.0186	0.0153502	4.38573	0.27379		98.2018	4.27422	102.395	15.6035	201.108	359.549	98.2018	4.27422	NA
JG-MDN2-88	177.828	9516.5	1.43218	22.0663	13.4743	0.0977757	13.6849	0.015648	2.39194	0.174786		100.092	2.37566	94.7211	12.3769	-38.5046	328.422	100.092	2.37566	NA
JG-MDN2-16	90.9662	6160.37	1.42323	27.0876	30.763	0.0810522	31.08	0.0159233	4.42792	0.142468		101.84	4.47395	79.1337	23.6651	-562.547	846.004	101.84	4.47395	NA
JG-MDN2-48	111.042	4612.53	0.692075	27.4475	25.0422	0.0801177	25.2447	0.0159489	3.19174	0.126432		102.002	3.23002	78.2556	19.0156	-598.287	689.175	102.002	3.23002	NA
JG-MDN2-83	258.735	1646.2	1.64025	19.2053	15.668	0.115232	16.1822	0.0160508	4.04676	0.250074		102.648	4.12103	110.741	16.9792	288.437	360.004	102.648	4.12103	NA
JG-MDN2-36	295.431	11736.7	1.65163	18.3676	7.48612	0.121865	7.90325	0.0162342	2.53364	0.320582		103.812	2.60915	116.761	8.71734	389.424	168.258	103.812	2.60915	NA
JG-MDN2-42	228.904	16716.2	2.48207	21.7736	14.8569	0.103102	15.7267	0.0162816	5.15781	0.327964		104.113	5.32681	99.6361	14.9263	-6.18043	360.19	104.113	5.32681	NA
JG-MDN2-64	297.252	17293.7	2.59254	22.1801	9.01343	0.101785	9.09679	0.0163736	1.22864	0.135063		104.696	1.27595	98.4226	8.53325	-51.0088	219.739	104.696	1.27595	NA
JG-MDN2-9	161.363	10230.5	0.845444	22.2151	17.7096	0.103099	17.8205	0.0166112	1.98425	0.111347		106.203	2.09006	99.6327	16.9133	-54.8475	434.216	106.203	2.09006	NA
JG-MDN2-101	212.945	13605.3	1.11957	18.6123	8.33566	0.123511	8.59041	0.0166726	2.07652	0.241726		106.592	2.19521	118.25	9.58924	359.643	188.39	106.592	2.19521	NA
JG-MDN2-53	224.564	10263.1	1.20688	21.0987	10.9139	0.109377	11.0934	0.016737	1.98796	0.179202		107.001	2.10958	105.395	11.1061	69.2507	260.304	107.001	2.10958	NA
JG-MDN2-55	102.599	5657.17	1.8719	21.3527	23.2373	0.108219	23.8487	0.0167594	5.36534	0.224974		107.142	5.70105	104.335	23.6512	40.714	562.333	107.142	5.70105	NA
JG-MDN2-32	374.991	13941.6	1.88089	21.015	2.93239	0.110296	3.49432	0.0168108	1.90037	0.543844		107.469	2.02537	106.237	3.52466	78.6667	69.6616	107.469	2.02537	NA
JG-MDN2-87	69.7473	3121.11	1.88594	25.9529	36.1165	0.0899242	36.4853	0.0169263	5.17468	0.141829		108.201	5.55231	87.4328	30.5745	-448.494	977.941	108.201	5.55231	NA
JG-MDN2-110	355.246	21555.6	3.3057	20.141	4.44834	0.11625	4.70786	0.0169814	1.54151	0.327433		108.55	1.6593	111.667	4.9784	178.619	103.773	108.55	1.6593	NA
JG-MDN2-84	112.805	2219.67	1.77679	18.2712	16.5181	0.128152	17.9838	0.0169821	7.11112	0.395418		108.554	7.6548	122.436	20.7458	401.227	372.282	108.554	7.6548	NA
JG-MDN2-68	490.408	33670.2	1.59694	21.0137	2.42142	0.112156	2.63932	0.0170933	1.05011	0.39787		109.259	1.13767	107.936	2.70259	78.8101	57.4899	109.259	1.13767	NA
JG-MDN2-52	703.045	9363.72	1.51251	19.6727	2.45395	0.120643	4.11892	0.0172133	3.30812	0.803152		110.02	3.60871	115.655	4.50247	233.234	56.6658	110.02	3.60871	NA
JG-MDN2-81	81.8769	4528.5	1.64986	22.304	35.5672	0.109114	36.0228	0.0176507	5.71094	0.158537		112.791	6.3854	105.154	35.9992	-64.5865	892.549	112.791	6.3854	NA
JG-MDN2-104	136.512	6522.31	1.06683	26.5861	16.4918	0.0917181	16.6772	0.0176851	2.47968	0.148687		113.009	2.77785	89.1026	14.2274	-512.404	442.594	113.009	2.77785	NA
JG-MDN2-20	385.064	13022.7	0.981518	19.7324	9.64373	0.124441	9.74604	0.0178091	1.40849	0.144519		113.794	1.58871	119.09	10.9522	226.221	223.346	113.794	1.58871	NA
JG-MDN2-85	101.385	6615.69	1.52804	25.4573	29.2795	0.0979413	29.5181	0.0180833	3.74516	0.126877		115.531	4.28827	94.8743	26.7427	-397.968	777.038	115.531	4.28827	NA
JG-MDN2-50	82.5496	5819.49	1.13839	24.0857	22.9126	0.103667	23.2006	0.0181092	3.6441	0.15707		115.695	4.17844	100.156	22.131	-255.643	586.806	115.695	4.17844	NA
JG-MDN2-98	140.093	5488.16	2.35849	20.1989	9.49071	0.123859	9.93381	0.0181448	2.93377	0.295332		115.92	3.37044	118.564	11.1167	171.925	221.94	115.92	3.37044	NA
JG-MDN2-33	251.333	16888.4	1.01941	21.0794	5.00305	0.119385	5.24485	0.0182519	1.57415	0.300132		116.598	1.81893	114.515	5.67988	71.3949	119.044	116.598	1.81893	NA
JG-MDN2-54	124.2	4163.29	2.0373	23.8622	16.2863	0.105913	16.6026	0.0183299	3.22551	0.194277		117.092	3.74272	102.22	16.1462	-232.086	412.895	117.092	3.74272	NA
JG-MDN2-14	200.558	7720.11	2.05118	20.5445	9.72421	0.125671	9.87704	0.0187253	1.73078	0.175232		119.595	2.05084	120.2	11.1969	132.192	229.094	119.595	2.05084	NA
JG-MDN2-96	92.5313	5719.03	1.54807	35.9604	47.1509	0.0719118	48.0079	0.0187553	9.03023	0.188099		119.785	10.717	70.5121	32.714	NA	NA	119.785	10.717	NA
JG-MDN2-91	244.483	9095.71	1.12657	22.6351	9.74783	0.115924	9.84672	0.0190306	1.39204	0.141371		121.527	1.67585	111.37	10.3866	-100.675	239.997	121.527	1.67585	NA
JG-MDN2-23	129.138	379.702	0.877955	12.9592	16.4449	0.212533	16.6519	0.0199758	2.61785	0.15721		127.503	3.30505	195.676	29.645	1125.45	329.884	127.503	3.30505	NA
JG-MDN2-43	490.172	4480.16	0.830245	19.5921	7.25702	0.148364	7.51658	0.0210817	1.9582	0.260517		134.489	2.60628	140.466	9.86079	242.664	167.414	134.489	2.60628	NA
JG-MDN2-4	90.764	7044.8	2.50327	21.8723	21.7824	0.138848	22.5428	0.0220259	5.80565	0.257538		140.447	8.06568	132.018	27.914	-17.1078	532.106	140.447	8.06568	NA
JG-MDN2-3	97.1425	6192.91	2.07923	20.2153	22.9935	0.152066	23.281	0.0222951	3.64768	0.15668		142.145	5.12825	143.734	31.2121	170.031	543.137	142.145	5.12825	NA
JG-MDN2-25	112.527	5491.32	2.87856	18.7726	10.0377	0.169328	10.7237	0.0230544	3.77385	0.351916		146.931	5.48223	158.836	15.769	340.294	227.786	146.931	5.48223	NA
JG-MDN2-39	29.0276	1784.84	1.50671	26.5037	112.048	0.123225	112.214	0.0236867	6.11267	0.0544732		150.914	9.11772	117.992	125.637	-504.128	1592.74	150.914	9.11772	NA
JG-MDN2-13	91.3448	7226.16	0.851154	17.5949	14.17	0.187499	14.7423	0.0239268	4.06782	0.275929		152.426	6.12767	174.493	23.6395	485.111	314.269	152.426	6.12767	NA
JG-MDN2-66	60.1339	2463.01	3.1382	26.2324	24.1086	0.12629	24.4538	0.0240273	4.09456	0.16744		153.059	6.19326	120.759	27.8486	-476.789	646.347	153.059	6.19326	NA
JG-MDN2-60	52.2492	3661.84	2.87903	25.7144	60.0974	0.129452	60.5253	0.0241425	7.18387	0.118692		153.784	10.9169	123.605	70.5512	-424.234	1718.96	153.784	10.9169	NA
JG-MDN2-112	120.867	21063.5	1.2936	21.4705	14.4432	0.161898	14.7278	0.0252106	2.88128	0.195636		160.503	4.56746	152.363	20.8402	27.5368	347.845	160.503	4.56746	NA
JG-MDN2-63	160.592	20513	2.12523	21.464	11.1132	0.162731	11.2115	0.0253326	1.48152	0.132143		161.27	2.35962	153.091	15.9338	28.2402	267.124	161.27	2.35962	NA
JG-MDN2-46	428.624	32533.1	1.8043	20.979	3.13565	0.169028	3.31904	0.0257183	1.08799	0.327801		163.695	1.75856	158.575	4.87281	82.7341	74.4283	163.695	1.75856	NA
JG-MDN2-57	108.476	9324.91	1.58197	22.347	13.0625	0.158968	13.2464	0.025765	2.19942	0.166039		163.988	3.5613	149.8	18.4508	-69.2945	320.184	163.988	3.5613	NA
JG-MDN2-1	121.018	12434.7	1.69646	19.1858	11.545	0.186233	11.6973	0.025914	1.88133	0.160835		164.925	3.06342	173.41	18.6488	290.744	264.505	164.925	3.06342	NA
JG-MDN2-8	197.143	5700.31	1.55326	20.4987	8.061	0.175708	8.36169	0.0261226	2.22221	0.265761		166.235	3.64688	164.36	12.6893	137.461	189.612	166.235	3.64688	NA
JG-MDN2-44	92.2701	6883.04	1.83303	21.8254	20.5614	0.165747	20.7766	0.0262365	2.98299	0.143574		166.951	4.91619	155.721	30.0035	-11.9223	501.219	166.951	4.91619	NA
JG-MDN2-82	172.223	13131.7	1.12394	19.8733	5.65363	0.182624	7.03623	0.0263224	4.18867	0.595301		167.49	6.92527	170.316	11.0331	209.749	131.168	167.49	6.92527	NA
JG-MDN2-102	374.599	29237.9	1.07709	20.345	3.76195	0.180373	3.82657	0.0266151	0.700238	0.182994		169.329	1.17027	168.382	5.93741	155.118	88.0982	169.329	1.17027	NA
JG-MDN2-65	117.081	14612.9	1.48002	19.9944	12.2301	0.183921	12.6551	0.026671	3.25187	0.256962		169.68	5.44578	171.429	19.9646	195.661	285.138	169.68	5.44578	NA
JG-MDN2-90	167.811	10571.9	1.64433	20.9693	8.88889	0.178023	9.05806	0.0270744	1.74245	0.192365		172.212	2.96098	166.358	13.9	83.8319	211.254	172.212	2.96098	NA
JG-MDN2-74	160.966	15615.7	1.39928	20.4407	5.19155	0.188063	5.54797	0.0278804	1.95646	0.352645		177.269	3.42095	174.976	8.91743	144.093	121.862	177.269	3.42095	NA
JG-MDN2-12	219.819	41583.9	1.32945	20.8091	6.8831	0.185718	7.28527	0.0280289	2.38708	0.327658		178.2	4.19552	172.969	11.5869	102.019	162.9	178.2	4.19552	NA
JG-MDN2-58	55.3938	4573.65	1.4845	21.5961	14.8223	0.184429	15.1654	0.0288872	3.20752	0.211503		183.58	5.8053	171.865	23.982	13.4877	358.007	183.58	5.8053	NA
JG-MDN2-94	172.784	2033.2	1.41001	20.5999	4.06229	0.194182	5.05816	0.0290117	3.01377	0.595822		184.36	5.47747	180.191	8.35162	125.84	95.6702	184.36	5.47747	NA
JG-MDN2-5	235.975	4198.24	1.12714	17.5993	8.78914	0.229489	9.08816	0.0292924	2.31208	0.254405		186.118	4.24167	209.777	17.226	484.595	194.403	186.118	4.24167	NA
JG-MDN2-69	218.609	7589.46	2.11077	19.7619	4.51214	0.232331	4.86547	0.0332991	1.82027	0.374121		211.163	3.78148	212.121	9.3142	222.763	104.392	211.163	3.78148	NA
JG-MDN2-107	91.7261	13172.5	3.21619	20.8211	13.6165	0.240829	13.79	0.0363672	2.18039	0.158114		230.276	4.93228	219.099	27.1828	100.645	323.315	230.276	4.93228	NA
JG-MDN2-19	420.21	95993.3	0.716447	17.562	1.35172	0.623041	1.4053	0.0793578	0.384353	0.273502		492.289	1.82168	491.751	5.4776	489.239	29.811	492.289	1.82168	100.623
JG-MDN2-31	317.008	33249.7	2.21599	10.9033	1.3626	1.02459	9.68261	0.0810227	9.58625	0.990049		502.224	46.3176	716.216	49.7946	1461.48	25.8981	1461.48	25.8981	34.3642
JG-MDN2-105	147.49	98635.1	0.611976	10.7696	0.721805	3.26385	1.29546	0.254936	1.07574	0.830392		1463.88	14.0876	1472.48	10.0693	1484.89	13.6755	1484.89	13.6755	98.5854
JG-MDN2-1	124.724	174951	2.34065	9.19697	0.56887	3.98369	3.71707	0.265723	3.67329	0.98822		1519.05	49.7132	1630.88	30.1782	1778.26	10.3766	1778.26	10.3766	85.4238
JG-MDN4
JG-MDN4-96	426.577	7010.38	1.05873	24.963	29.4834	0.0346995	29.6497	0.00628231	3.13625	0.105777		40.3717	1.2622	34.6358	10.0966	-347.113	774.713	40.3717	1.2622	NA
JG-MDN4-106	531.021	9267.83	1.56602	19.9822	10.9476	0.0437542	11.0748	0.00634105	1.67357	0.151116		40.748	0.679795	43.4827	4.71399	197.075	255.002	40.748	0.679795	NA
JG-MDN4-67	559.067	7104.42	1.27063	22.7765	13.6697	0.0384009	13.8962	0.00634348	2.4984	0.17979		40.7635	1.01522	38.2616	5.21802	-115.999	338.237	40.7635	1.01522	NA
JG-MDN4-77	524.087	6809.68	1.09495	21.4887	18.2956	0.040917	18.4017	0.00637693	1.97338	0.107239		40.9778	0.806085	40.7189	7.34485	25.4677	442.017	40.9778	0.806085	NA
JG-MDN4-80	1200.52	2572.61	0.661028	21.5799	7.26001	0.0407979	7.28378	0.00638536	0.587951	0.0807206		41.0318	0.240481	40.6028	2.89907	15.3172	174.683	41.0318	0.240481	NA
JG-MDN4-66	616.682	3247.23	1.47131	21.6278	13.3324	0.0407801	13.4574	0.00639674	1.82957	0.135953		41.1047	0.749647	40.5854	5.35407	9.98767	321.95	41.1047	0.749647	NA
JG-MDN4-98	793.982	11163	1.23875	21.2275	11.271	0.0417902	11.3266	0.00643385	1.12132	0.0989986		41.3424	0.462098	41.5703	4.61347	54.7612	269.602	41.3424	0.462098	NA
JG-MDN4-25	2430.91	20141.7	0.510289	21.2582	1.77028	0.0417405	1.87374	0.00643551	0.614026	0.3277		41.353	0.253106	41.5219	0.762322	51.2908	42.2683	41.353	0.253106	NA
JG-MDN4-103	473.762	6343.32	1.02295	19.8857	12.7458	0.0447677	12.8575	0.00645659	1.69102	0.13152		41.4881	0.699319	44.4682	5.59418	208.326	296.56	41.4881	0.699319	NA
JG-MDN4-88	1029.92	13155.2	0.755396	21.8214	10.5951	0.0409153	10.6579	0.00647541	1.15569	0.108435		41.6086	0.479318	40.7173	4.2538	-11.4736	256.55	41.6086	0.479318	NA
JG-MDN4-74	702.867	18074.2	0.953691	19.8364	5.94287	0.0450214	6.06729	0.0064771	1.22241	0.201476		41.6194	0.507122	44.7148	2.65411	214.072	137.767	41.6194	0.507122	NA
JG-MDN4-28	386.728	10873.9	1.04862	20.0313	10.5186	0.0446839	10.9289	0.00649171	2.96644	0.27143		41.713	1.2334	44.3868	4.74653	191.38	245.217	41.713	1.2334	NA
JG-MDN4-53	2653.46	36212.6	1.93495	21.1929	2.05713	0.0423738	2.208	0.00651307	0.802153	0.363294		41.8498	0.334612	42.139	0.911386	58.6577	49.0377	41.8498	0.334612	NA
JG-MDN4-95	839.462	17155.4	1.03454	21.6416	7.97054	0.0415391	8.05842	0.00651997	1.1868	0.147274		41.894	0.495584	41.3256	3.26334	8.42215	192.072	41.894	0.495584	NA
JG-MDN4-82	505.549	14136.6	1.13213	22.3608	14.4569	0.0402499	14.6051	0.00652755	2.0758	0.142128		41.9426	0.867818	40.068	5.73808	-70.7984	354.752	41.9426	0.867818	NA
JG-MDN4-5	390.574	5061.89	1.42245	24.0859	21.0824	0.0374993	21.2122	0.00655065	2.34297	0.110454		42.0905	0.982956	37.3796	7.78499	-255.665	539.014	42.0905	0.982956	NA
JG-MDN4-50	562.842	10602.5	0.805329	22.4232	11.2	0.0404235	11.4316	0.006574	2.28913	0.200246		42.2401	0.963768	40.2374	4.50985	-77.6107	274.726	42.2401	0.963768	NA
JG-MDN4-1	437.725	3263.25	1.12836	21.7434	15.4764	0.0417337	15.8393	0.00658132	3.37122	0.212839		42.2869	1.42092	41.5153	6.4432	-2.83383	375.123	42.2869	1.42092	NA
JG-MDN4-87	320.101	5811.3	1.23677	24.4078	19.7602	0.0371861	20.066	0.00658275	3.48992	0.173922		42.2961	1.47127	37.073	7.30503	-289.407	508.047	42.2961	1.47127	NA
JG-MDN4-92	468.055	7507.45	0.819177	23.2995	11.7497	0.0389587	11.7984	0.0065834	1.0711	0.0907832		42.3003	0.451595	38.8069	4.49224	-172.269	293.618	42.3003	0.451595	NA
JG-MDN4-105	449.509	7694.57	1.37581	19.2973	8.59393	0.0470523	9.02549	0.0065853	2.7575	0.305524		42.3124	1.16294	46.6861	4.11827	277.53	197.083	42.3124	1.16294	NA
JG-MDN4-45	284.145	4714.17	1.22321	21.1554	16.4304	0.042922	16.7111	0.00658566	3.05044	0.182539		42.3147	1.28656	42.6729	6.98346	62.8537	393.621	42.3147	1.28656	NA
JG-MDN4-102	518.63	9820.1	1.01451	24.1318	11.3554	0.0376485	11.4668	0.00658926	1.59446	0.13905		42.3378	0.672848	37.5256	4.22447	-260.494	288.686	42.3378	0.672848	NA
JG-MDN4-52	393.541	7399.51	1.13521	23.4286	10.5413	0.0390482	10.6742	0.00663508	1.6796	0.157351		42.6312	0.71367	38.8943	4.07318	-186.054	263.998	42.6312	0.71367	NA
JG-MDN4-21	313.199	6468.78	1.14114	24.3498	26.9349	0.0375718	27.061	0.00663523	2.60997	0.0964474		42.6321	1.10901	37.4506	9.95021	-283.345	696.614	42.6321	1.10901	NA
JG-MDN4-76	839.909	16073	1.28996	19.7687	5.63473	0.0463047	5.78096	0.00663899	1.29203	0.223497		42.6562	0.549311	45.9609	2.59775	221.985	130.405	42.6562	0.549311	NA
JG-MDN4-47	322.412	10824.3	1.31292	20.2824	17.7844	0.0453355	18.6912	0.00666894	5.75139	0.307705		42.8481	2.45619	45.0199	8.23113	162.297	418.7	42.8481	2.45619	NA
JG-MDN4-119	254.214	5137.2	1.32095	22.7294	29.3421	0.0406291	30.6872	0.00669766	8.98566	0.292815		43.0319	3.85383	40.4381	12.166	-110.897	735.994	43.0319	3.85383	NA
JG-MDN4-22	305.153	3918.29	1.60617	23.9874	15.5561	0.0385756	15.8376	0.0067111	2.97268	0.187698		43.118	1.27749	38.4324	5.97308	-245.29	395.217	43.118	1.27749	NA
JG-MDN4-12	2964.69	62857	1.68516	21.0528	1.53728	0.0440522	1.6122	0.00672631	0.485766	0.301305		43.2154	0.209223	43.7726	0.690709	74.4377	36.5406	43.2154	0.209223	NA
JG-MDN4-93	336.985	1877.22	1.0697	23.3188	18.0553	0.0398165	18.1523	0.00673392	1.87396	0.103235		43.2641	0.808038	39.6449	7.05789	-174.328	453.153	43.2641	0.808038	NA
JG-MDN4-71	334.363	5761.16	0.976432	17.0779	17.3153	0.054402	17.7859	0.00673827	4.06456	0.228527		43.292	1.75374	53.7886	9.31809	550.573	380.589	43.292	1.75374	NA
JG-MDN4-24	381.578	10337.7	1.23561	24.1791	19.3399	0.0386535	19.4664	0.0067784	2.21592	0.113833		43.5489	0.961759	38.5086	7.35599	-265.456	494.699	43.5489	0.961759	NA
JG-MDN4-73	430.627	10678.1	2.46149	21.0896	12.1732	0.0444707	12.3634	0.00680206	2.1601	0.174718		43.7004	0.940782	44.1795	5.345	70.2882	290.451	43.7004	0.940782	NA
JG-MDN4-13	271.338	8023.9	1.31614	22.9097	23.6948	0.0409951	23.9067	0.00681164	3.17593	0.132847		43.7617	1.38514	40.7952	9.55975	-130.397	592.627	43.7617	1.38514	NA
JG-MDN4-56	185.531	1594.69	1.66603	23.0847	38.7083	0.0406861	39.2307	0.00681191	6.38056	0.162642		43.7635	2.7829	40.4937	15.5746	-149.233	992.576	43.7635	2.7829	NA
JG-MDN4-26	1265.36	23761.2	0.489248	20.9346	3.2453	0.045191	3.52956	0.00686144	1.38774	0.393178		44.0806	0.60964	44.8795	1.54955	87.8076	76.954	44.0806	0.60964	NA
JG-MDN4-113	88.9958	1505.25	1.60896	15.1323	439.653	0.0629419	439.722	0.00690784	7.74813	0.0176205		44.3777	3.42663	61.9794	270.616	809.017	0	44.3777	3.42663	NA
JG-MDN4-35	437.144	2902.94	0.965626	21.7975	17.1181	0.0441601	17.2978	0.00698127	2.48746	0.143802		44.8478	1.1117	43.8776	7.42836	-8.82534	415.865	44.8478	1.1117	NA
JG-MDN4-54	227.615	4448.57	1.8072	25.782	19.0233	0.0373577	19.4003	0.00698548	3.80599	0.196182		44.8747	1.702	37.2411	7.09409	-431.118	502.975	44.8747	1.702	NA
JG-MDN4-83	255.792	337.705	0.816609	18.0381	32.8519	0.0544129	33.3529	0.00711853	5.75945	0.172682		45.7264	2.62427	53.7991	17.4782	429.922	750.849	45.7264	2.62427	NA
JG-MDN4-8	436.946	5174.7	1.35124	20.1324	11.9662	0.0492238	12.0138	0.00718737	1.06786	0.0888862		46.1671	0.491238	48.7898	5.72296	179.607	279.772	46.1671	0.491238	NA
JG-MDN4-86	172.818	5313.12	0.814783	32.4152	46.3098	0.0307713	46.7018	0.00723424	6.03811	0.129291		46.4671	2.79565	30.7736	14.1571	-1073.89	1459.61	46.4671	2.79565	NA
JG-MDN4-112	267.83	4072.09	1.38998	21.3083	18.6148	0.0469537	20.1117	0.00725634	7.61386	0.378578		46.6085	3.5359	46.5906	9.15868	45.6783	448.123	46.6085	3.5359	NA
JG-MDN4-65	300.34	6496.84	0.925123	22.0191	10.7189	0.0463179	11.0662	0.00739685	2.7504	0.248541		47.5076	1.30185	45.9737	4.97411	-33.309	260.645	47.5076	1.30185	NA
JG-MDN4-14	523.078	8328.5	1.37073	22.3846	10.6525	0.0460921	11.0687	0.00748296	3.00658	0.27163		48.0587	1.43955	45.7545	4.95205	-73.3958	261.019	48.0587	1.43955	NA
JG-MDN4-109	269.429	8696.71	1.31202	19.2537	18.3671	0.0537618	18.6095	0.00750735	2.99391	0.160881		48.2147	1.43812	53.172	9.64069	282.706	423.319	48.2147	1.43812	NA
JG-MDN4-108	177.991	3361.76	1.6173	22.4701	28.4028	0.0461871	28.8179	0.00752706	4.87354	0.169115		48.3408	2.3471	45.8468	12.919	-82.7284	707.724	48.3408	2.3471	NA
JG-MDN4-9	361.467	6081.05	1.39916	22.7358	18.9488	0.0462418	18.9979	0.00762508	1.36456	0.0718269		48.968	0.665666	45.8999	8.52606	-111.598	470.149	48.968	0.665666	NA
JG-MDN4-3	185.662	3187.91	0.946685	22.95	24.6859	0.0488356	24.9385	0.00812864	3.54043	0.141966		52.1888	1.84025	48.4141	11.791	-134.737	618.579	52.1888	1.84025	NA
JG-MDN4-44	83.9592	1238.69	0.813737	27.0587	33.2283	0.0424004	34.553	0.00832101	9.4756	0.274234		53.4187	5.04083	42.1649	14.2718	-559.673	916.371	53.4187	5.04083	NA
JG-MDN4-40	4145.46	70945.6	1.26481	21.193	1.56771	0.0564214	9.84919	0.0086723	9.72362	0.987251		55.6642	5.38928	55.7314	5.34122	58.6455	37.3856	55.6642	5.38928	NA
JG-MDN4-43	118.505	3375.45	1.62732	22.4262	16.7948	0.0792331	17.9789	0.0128873	6.41681	0.356908		82.5459	5.26304	77.4236	13.4032	-77.939	413.338	82.5459	5.26304	NA
JG-MDN4-90	287.97	9140.52	3.60793	21.1282	11.4936	0.0864696	11.6756	0.0132503	2.05344	0.175874		84.8558	1.73104	84.2093	9.43556	65.9266	274.386	84.8558	1.73104	NA
JG-MDN4-23	707.733	8400.59	1.27913	21.1905	7.14696	0.0892264	7.17259	0.013713	0.605814	0.0844624		87.7992	0.528294	86.7825	5.96604	58.9264	170.527	87.7992	0.528294	NA
JG-MDN4-70	203.524	12940.3	1.31039	20.0474	13.4277	0.0945914	14.1922	0.0137533	4.59514	0.32378		88.0556	4.01877	91.7714	12.4538	189.464	313.621	88.0556	4.01877	NA
JG-MDN4-64	607.25	48082.3	1.12169	20.3668	4.84302	0.096129	4.96811	0.0141996	1.10783	0.222989		90.8928	0.999875	93.1968	4.42401	152.583	113.484	90.8928	0.999875	NA
JG-MDN4-60	153.955	4740.83	1.40405	24.7974	17.8279	0.0814858	18.1716	0.014655	3.51756	0.193575		93.7869	3.27513	79.5409	13.9031	-329.967	461.384	93.7869	3.27513	NA
JG-MDN4-107	140.807	4375.85	3.10389	23.187	16.0998	0.087401	16.3491	0.014698	2.84428	0.173972		94.0599	2.6559	85.0794	13.3437	-160.212	402.412	94.0599	2.6559	NA
JG-MDN4-20	754.776	29722	0.849683	20.4869	5.81862	0.0991339	5.95841	0.0147299	1.28308	0.215339		94.2622	1.20066	95.9766	5.45677	138.811	136.752	94.2622	1.20066	NA
JG-MDN4-37	353.342	17221.3	2.56965	22.0765	8.92998	0.0929263	9.75957	0.0148788	3.93758	0.403459		95.2082	3.72135	90.2257	8.42593	-39.6262	217.224	95.2082	3.72135	NA
JG-MDN4-63	267.595	13829.3	2.03486	21.0272	5.71011	0.0980671	5.99508	0.0149556	1.82637	0.304645		95.6961	1.73486	94.9906	5.43655	77.2894	135.723	95.6961	1.73486	NA
JG-MDN4-19	491.513	13145.6	1.48154	21.0859	5.07564	0.100974	5.22867	0.015442	1.25573	0.240163		98.7845	1.23101	97.6752	4.8692	70.6791	120.789	98.7845	1.23101	NA
JG-MDN4-91	559.629	21869.6	0.843855	20.1612	2.77196	0.106476	2.88806	0.0155693	0.810622	0.28068		99.5928	0.801116	102.737	2.82195	176.28	64.6562	99.5928	0.801116	NA
JG-MDN4-10	310.426	40443.8	1.37659	21.1738	4.89054	0.101785	5.0861	0.0156308	1.39678	0.274627		99.9829	1.38577	98.4226	4.77094	60.7979	116.573	99.9829	1.38577	NA
JG-MDN4-120	293.711	22903.5	2.18081	20.4015	6.10113	0.107114	6.21328	0.0158492	1.17521	0.189145		101.369	1.18199	103.322	6.10393	148.617	143.16	101.369	1.18199	NA
JG-MDN4-6	819.834	39777.1	0.92887	20.5019	4.39701	0.107511	4.45658	0.0159862	0.726225	0.162955		102.239	0.736624	103.686	4.39277	137.096	103.328	102.239	0.736624	NA
JG-MDN4-85	247.921	17109.5	2.00013	20.4688	12.2814	0.107915	12.4015	0.0160205	1.72236	0.138882		102.456	1.75071	104.057	12.266	140.888	289.231	102.456	1.75071	NA
JG-MDN4-42	477.433	16206.9	2.46547	22.1991	6.55284	0.100466	6.68019	0.0161753	1.29818	0.194332		103.439	1.3321	97.2064	6.19251	-53.0986	159.681	103.439	1.3321	NA
JG-MDN4-117	113.834	5561.07	2.23712	22.3515	19.534	0.0998642	20.1742	0.0161888	5.04202	0.249924		103.524	5.17802	96.651	18.6014	-69.7823	481.02	103.524	5.17802	NA
JG-MDN4-49	173.524	5798.96	1.97622	23.25	10.4128	0.0964054	10.6557	0.0162564	2.26232	0.212311		103.953	2.33288	93.4528	9.51382	-166.97	259.77	103.953	2.33288	NA
JG-MDN4-48	236.828	28567.6	1.84862	22.204	8.40545	0.101538	8.52554	0.0163516	1.42594	0.167255		104.556	1.47889	98.1952	7.97978	-53.6325	204.985	104.556	1.47889	NA
JG-MDN4-110	422.395	12356.8	1.25543	21.9198	4.60665	0.103758	4.86766	0.0164952	1.57255	0.323061		105.467	1.64503	100.239	4.64624	-22.3522	111.563	105.467	1.64503	NA
JG-MDN4-94	197.506	10101.8	1.10099	21.0912	10.1656	0.109561	10.3046	0.0167593	1.68728	0.16374		107.142	1.79285	105.564	10.332	70.1059	242.322	107.142	1.79285	NA
JG-MDN4-84	70.7935	3433.51	1.57965	26.6547	37.0324	0.0872836	37.8983	0.0168735	8.05504	0.212544		107.866	8.61639	84.9698	30.9011	-519.295	1018.85	107.866	8.61639	NA
JG-MDN4-55	207.596	11254.2	1.69364	22.2588	10.9774	0.107718	11.1514	0.0173896	1.96252	0.175988		111.137	2.16239	103.876	11.0112	-59.6426	268.31	111.137	2.16239	NA
JG-MDN4-104	810.139	49611.5	1.93821	20.7267	1.9012	0.115829	2.05922	0.0174119	0.791107	0.384177		111.278	0.872777	111.284	2.17048	111.423	44.8964	111.278	0.872777	NA
JG-MDN4-4	141.207	5596.08	1.63955	25.7631	25.2566	0.0940061	25.4009	0.0175652	2.70396	0.106451		112.25	3.00891	91.2284	22.1659	-429.196	671.391	112.25	3.00891	NA
JG-MDN4-69	180.324	13503.6	1.77316	22.0652	10.8553	0.114184	11.0636	0.018273	2.13669	0.193129		116.732	2.47176	109.785	11.5131	-38.3835	264.233	116.732	2.47176	NA
JG-MDN4-81	507.472	25759.2	0.908027	20.6692	3.00042	0.124409	3.12477	0.0186498	0.872716	0.27929		119.117	1.03001	119.061	3.51055	117.951	70.7483	119.117	1.03001	NA
JG-MDN4-72	4158.26	165682	1.35883	20.6658	0.728176	0.134994	1.90872	0.0202333	1.76436	0.924369		129.13	2.25565	128.576	2.30513	118.349	17.1682	129.13	2.25565	NA
JG-MDN4-111	61.6699	5035.83	2.41387	29.8838	36.7849	0.11622	37.3704	0.0251893	6.58912	0.176319		160.369	10.4366	111.64	39.5284	-835.262	1081.11	160.369	10.4366	NA
JG-MDN4-59	338.928	26670.6	0.950272	20.8094	3.80073	0.169273	3.93979	0.0255473	1.0375	0.263338		162.62	1.66608	158.788	5.79133	101.989	89.8999	162.62	1.66608	NA
JG-MDN4-118	124.429	7828.61	1.53362	22.2209	8.87647	0.160372	9.52855	0.0258458	3.46433	0.363573		164.496	5.62658	151.029	13.3726	-55.4823	216.574	164.496	5.62658	NA
JG-MDN4-33	156.503	10333.8	1.02123	19.8395	5.37808	0.179707	5.76109	0.025858	2.06553	0.358531		164.572	3.35627	167.808	8.91121	213.712	124.679	164.572	3.35627	NA
JG-MDN4-29	187.768	8580.43	1.03178	20.2854	7.05144	0.177998	7.12654	0.0261878	1.03193	0.1448		166.645	1.69761	166.337	10.9344	161.951	165.065	166.645	1.69761	NA
JG-MDN4-116	303.567	29376.3	1.39478	21.0645	6.50714	0.173204	6.59443	0.026461	1.06944	0.162173		168.361	1.7772	162.195	9.88563	73.0798	154.817	168.361	1.7772	NA
JG-MDN4-30	472.288	30372.7	0.900165	20.9469	3.50877	0.176661	3.54303	0.0268386	0.491533	0.138732		170.732	0.828187	165.183	5.4013	86.4143	83.2335	170.732	0.828187	NA
JG-MDN4-100	938.632	97219.1	0.760444	20.4878	1.6137	0.183799	1.66817	0.027311	0.422802	0.253452		173.697	0.724587	171.325	2.62989	138.7	37.892	173.697	0.724587	NA
JG-MDN4-18	413.042	25962	1.04347	19.6127	3.82494	0.192433	3.93083	0.0273726	0.906251	0.23055		174.083	1.55652	178.703	6.44119	240.269	88.1996	174.083	1.55652	NA
JG-MDN4-39	195.268	9423.71	1.19731	20.5282	5.86492	0.185669	5.98463	0.0276433	1.19103	0.199016		175.781	2.06533	172.927	9.51602	134.082	137.938	175.781	2.06533	NA
JG-MDN4-62	231.28	17822.9	0.74463	20.5033	4.4411	0.187472	4.54613	0.0278778	0.971523	0.213704		177.253	1.69859	174.47	7.28772	136.935	104.374	177.253	1.69859	NA
JG-MDN4-38	328.92	25026	1.38861	20.1504	3.9845	0.196546	4.09096	0.0287242	0.927219	0.226651		182.558	1.66897	182.199	6.82333	177.526	92.9203	182.558	1.66897	NA
JG-MDN4-61	550.548	79625.6	0.976375	19.9543	2.50399	0.201408	2.54818	0.0291482	0.472522	0.185435		185.215	0.86273	186.317	4.33759	200.328	58.142	185.215	0.86273	NA
JG-MDN4-32	156.177	12906.3	1.1623	19.933	12.9781	0.203109	13.0313	0.029363	1.17666	0.0902948		186.56	2.16371	187.753	22.3414	202.806	302.306	186.56	2.16371	NA
JG-MDN4-2	1070.84	44240.6	0.800218	20.0396	1.35053	0.203705	1.69862	0.0296068	1.03024	0.606514		188.087	1.90975	188.257	2.91884	190.41	31.4193	188.087	1.90975	NA
JG-MDN4-97	98.8625	10106.1	1.78825	21.2798	11.6041	0.192172	11.7984	0.0296589	2.13227	0.180725		188.413	3.95934	178.481	19.3133	48.8467	277.918	188.413	3.95934	NA
JG-MDN4-58	126.201	13770	2.01039	20.5167	7.8362	0.200437	7.94659	0.0298253	1.32	0.166109		189.455	2.46441	185.496	13.4733	135.36	184.385	189.455	2.46441	NA
JG-MDN4-78	110.089	14220.1	1.51082	20.1675	12.3983	0.203924	12.5375	0.0298277	1.86312	0.148604		189.47	3.47867	188.441	21.5663	175.552	290.155	189.47	3.47867	NA
JG-MDN4-7	154.004	14229.4	1.19752	21.5479	8.05519	0.191771	8.3004	0.0299701	2.00261	0.241267		190.361	3.75645	178.14	13.5627	18.9036	193.722	190.361	3.75645	NA
JG-MDN4-51	137.829	6782.01	2.25111	21.6756	13.45	0.195619	14.5611	0.0307526	5.57867	0.383123		195.257	10.7294	181.412	24.1949	4.66299	325.148	195.257	10.7294	NA
JG-MDN4-115	294.656	22965.6	1.65144	19.0568	4.69826	0.263318	4.79066	0.0363939	0.936353	0.195454		230.442	2.11964	237.337	10.1393	306.155	107.064	230.442	2.11964	NA
JG-MDN4-75	84.8627	11594.6	3.50953	22.1553	20.9217	0.230453	21.1089	0.0370305	2.80499	0.132882		234.4	6.45681	210.573	40.1642	-48.2924	513.712	234.4	6.45681	NA
JG-MDN4-57	177.887	23442.5	1.5987	19.2665	3.88697	0.275846	4.75529	0.038545	2.73938	0.57607		243.808	6.55411	247.357	10.4397	281.181	88.9548	243.808	6.55411	NA
JG-MDN4-114	440.078	46523.8	0.795414	19.3623	2.40477	0.322952	2.63549	0.0453517	1.07837	0.409172		285.921	3.0159	284.171	6.53268	269.781	55.1513	285.921	3.0159	NA
JG-MDN4-99	73.6504	14022	1.82651	17.3937	9.01302	0.637582	9.18142	0.0804318	1.75037	0.190643		498.699	8.40001	500.808	36.3126	510.47	198.502	498.699	8.40001	97.6942
JG-MDN4-89	365.163	127117	0.987463	16.2518	0.55098	0.882975	0.715883	0.104076	0.457067	0.638465		638.25	2.77747	642.588	3.40861	657.869	11.8152	638.25	2.77747	97.0178
JG-MDN4-34	262.08	101497	4.12307	11.3504	0.579606	2.68178	1.05011	0.220766	0.875666	0.833879		1285.92	10.2084	1323.45	7.76675	1384.71	11.1311	1384.71	11.1311	92.8655
JG-MDN4-46	298.354	156739	1.45945	11.0069	0.487688	3.14838	0.625139	0.251334	0.391099	0.625619		1445.35	5.06388	1444.6	4.81746	1443.48	9.29135	1443.48	9.29135	100.129
JG-MDN4-36	344.741	327724	16.974	9.37194	0.341909	3.84212	1.21176	0.261155	1.16252	0.959367		1495.75	15.5185	1601.62	9.76323	1743.8	6.26273	1743.8	6.26273	85.7753
JG-MDN4-31	210.725	191505	2.9057	9.1757	0.475675	4.76122	0.96696	0.316852	0.84187	0.870636		1774.34	13.0582	1778.09	8.11431	1782.47	8.67187	1782.47	8.67187	99.5435
JG-MDN4-79	86.5855	98355.1	1.37819	8.83824	0.84491	4.96796	1.17493	0.318451	0.816444	0.694889		1782.16	12.7123	1813.89	9.93132	1850.51	15.2772	1850.51	15.2772	96.3063
JG-MDN4-68	30.2176	30490.5	2.02594	8.7436	1.31508	5.36351	1.89093	0.340125	1.35875	0.71856		1887.27	22.2306	1879.05	16.1843	1869.95	23.7224	1869.95	23.7224	100.926
JG-MDN4-27	182.114	46390.4	2.90529	8.35545	2.72951	1.06231	10.3125	0.0643754	9.94469	0.964336		402.18	38.774	734.962	53.9883	1951.47	48.771	1951.47	48.771	20.6091
JG-MDN4-15	208.314	87046.1	2.12435	6.41414	2.72706	9.62836	3.10045	0.447909	1.47511	0.475772		2385.95	29.4166	2399.88	28.5269	2411.72	46.3257	2411.72	46.3257	98.9315
JG-MDN4-11	178.489	297519	1.79347	5.04244	0.0978164	14.9496	0.269702	0.546725	0.251338	0.931912		2811.54	5.72708	2812.04	2.56681	2812.38	1.59867	2812.38	1.59867	99.9701
† 900 Ma cutoff used between 206Pb*/238U and 206Pb*/207Pb* ages									Data reduction methods follow Gehrels et al. (2008).
Best age values were rejected for high discordance (>20%)									Age uncertainties are reported at the 1-sigma level

## Sheet: Table S2
This Supplemental Material accompanies Gooley, J.T., Grove, M., and Graham, S.A., 2021,
Tectonic evolution of the central California margin as reflected by detrital zircon composition
in the Mount Diablo region, in Sullivan, R., Sloan, D., Unruh, J.R., and Schwartz, D.P., eds.,
Regional Geology of Mount Diablo, California: Its Tectonic Evolution on the North America
Plate Boundary: Geological Society of America Memoir 217, https://doi.org/10.1130/2021.1217(14).
Table S2. Relative abundance of dominant U-Pb age components
Age	N	0-23 Ma	23-34 Ma	34-65 Ma	65-85 Ma	85-100 Ma	100-135 Ma	135-200 Ma	200-300 Ma	>300 Ma
modern	322	0.022	0.009	0.009	0.012	0.255	0.304	0.286	0.019	0.084
Mohnian (Contra Costa Grp)	102	0.01	0.02	0.01	0.01	0.137	0.333	0.333	0.029	0.118
Mohnian (San Pablo Grp.)	625	0.19	0.05	0.024	0.01	0.221	0.306	0.139	0.008	0.053
Luisian (Hambre)	117	0.145	0.085	0.026	0	0.188	0.265	0.205	0.009	0.077
Saucesian–Relizian (Sobrante)	111	0	0.009	0.009	0.036	0.216	0.414	0.234	0.018	0.063
Saucesian (Mont. Undiff.)	142	0.035	0.387	0.056	0.049	0.085	0.141	0.183	0	0.063
Mid–Upper Eocene	116	0	0	0.448	0.017	0.095	0.138	0.172	0.034	0.095
Middle Eocene	177	0	0	0.119	0.04	0.09	0.198	0.215	0.006	0.333
Lower Eocene	364	0	0	0.003	0.014	0.297	0.418	0.206	0.016	0.047
Paleocene	188	0	0	0	0.005	0.388	0.41	0.165	0	0.032
upper Cretaeous	282	0	0	0	0.021	0.252	0.348	0.273	0.025	0.082
Mid Cretaceous	93	0	0	0	0	0	0.151	0.817	0	0.032
Sample	N	0-23 Ma	23-34 Ma	34-65 Ma	65-85 Ma	85-100 Ma	100-135 Ma	135-200 Ma	200-300 Ma	>300 Ma
JG-BH5	102	0.00980392	0.0196078	0.00980392	0.00980392	0.137255	0.333333	0.333333	0.0294118	0.117647
JG-MDN1	103	0.0291262	0.0582524	0.0291262	0.00970874	0.640777	0.165049	0.0291262	0.00970874	0.0291262
JG-MDS13	117	0.401709	0.025641	0.00854701	0.017094	0.042735	0.401709	0.0769231	0	0.025641
JG-MDS12	108	0.324074	0.0555556	0	0.00925926	0.157407	0.25	0.157407	0	0.0462963
JG-MDN2	103	0.194175	0.0582524	0.0291262	0	0.145631	0.291262	0.223301	0.0194175	0.038835
JG-MDS10	79	0.0379747	0.0506329	0.0253165	0	0.164557	0.43038	0.202532	0.0126582	0.0759494
JG-BH8	115	0.0956522	0.0521739	0.0521739	0.0173913	0.191304	0.313043	0.165217	0.00869565	0.104348
JG-BH7	117	0.145299	0.0854701	0.025641	0	0.188034	0.264957	0.205128	0.00854701	0.0769231
JG-MDS9	142	0.0352113	0.387324	0.056338	0.0492958	0.084507	0.140845	0.183099	0	0.0633803
JG-BH6	111	0	0.00900901	0.00900901	0.036036	0.216216	0.414414	0.234234	0.018018	0.0630631
JG-MDN4	116	0	0	0.448276	0.0172414	0.0948276	0.137931	0.172414	0.0344828	0.0948276
GVG09-18	87	0	0	0.172414	0.045977	0.0574713	0.183908	0.183908	0.0114943	0.344828
TD1F-105	90	0	0	0.0666667	0.0333333	0.122222	0.211111	0.244444	0	0.322222
GVG09-22	85	0	0	0.0117647	0.0235294	0.211765	0.447059	0.223529	0.0117647	0.0705882
GVG09-23	94	0	0	0	0.0212766	0.265957	0.425532	0.212766	0	0.0744681
GVG09-24	96	0	0	0	0	0.302083	0.364583	0.260417	0.03125	0.0416667
GVG09-0.5	89	0	0	0	0.011236	0.404494	0.438202	0.123596	0.0224719	0
GVG09-16	94	0	0	0	0	0.297872	0.489362	0.191489	0	0.0212766
GVG09-17	94	0	0	0	0.0106383	0.478723	0.329787	0.138298	0	0.0425532
GVG09-15	100	0	0	0	0.02	0.33	0.33	0.21	0.02	0.09
GVG09-14	89	0	0	0	0.011236	0.224719	0.483146	0.224719	0.011236	0.0449438
GVG09-13	93	0	0	0	0.0322581	0.193548	0.236559	0.387097	0.0430108	0.107527
GVG09-12	93	0	0	0	0	0	0.150538	0.817204	0	0.0322581
GVG09-12	93	0	0	0	0	0	0.150538	0.817204	0	0.0322581
